# Supplementary material for: Palladium-catalysed imidoylative spirocyclization of 3-(2-isocyanoethyl)indoles
Source: Royal Society of Chemistry journal article supplement (doi:10.1039/d1cc03240b), 2021-01-01

## *Supporting Information*

# **Palladium-Catalyzed Imidoylative Spirocyclization of 3-(2-Isocyanoethyl)indoles**

Shi Tang,<sup>†‡#</sup> Shumin Ding,<sup>†#</sup> Dan Li,<sup>†</sup> Lianjie Li,<sup>†</sup> Haixia Zhao,<sup>†</sup> Minxue Chai,<sup>†</sup> and  
Jian Wang<sup>\*†</sup>

### Contents

|                                                                         |      |
|-------------------------------------------------------------------------|------|
| 1. General considerations .....                                         | S2   |
| 2. Experimental section .....                                           | S2   |
| 3. Characterization data .....                                          | S8   |
| 4. <sup>1</sup> H and <sup>13</sup> C NMR spectra of all products ..... | S45  |
| 5. X-ray Crystallographic Data .....                                    | S108 |

## 1. General considerations

The reactions were carried out under air or argon atmosphere.  $^1\text{H}$  NMR and  $^{13}\text{C}$  NMR spectra were measured on a Bruker Avance NMR spectrometer (400 MHz or 100 MHz, respectively) in  $\text{CDCl}_3$  as solvent and recorded in ppm relative to internal standard tetramethylsilane.  $^1\text{H}$  NMR data are reported as follows:  $\delta$ , chemical shift; coupling constants ( $J$  are given in Hertz, Hz) and integration. Abbreviations to denote the multiplicity of a particular signal were s (singlet), d (doublet), t (triplet), q (quartet), m (multiplet), and br (broad singlet). High resolution mass spectroscopic data of the products were collected on an Agilent Technologies 6540 UHD Accurate-Mass Q-TOF LC/MS using ESI. The chemicals and solvents were purchased from commercial suppliers either from Aldrich (USA) or Shanghai Chemical Company (China) without further purification unless otherwise specified. Products were purified by flash chromatography on 200-300 mesh silica gels,  $\text{SiO}_2$ .

## 2. Experimental section

### Synthesis of starting materials:

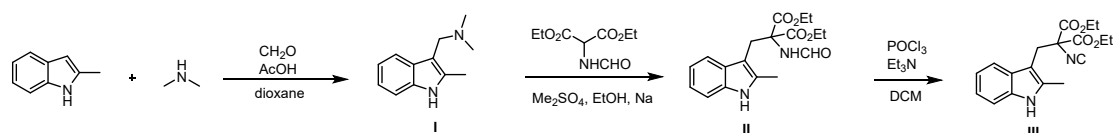

**Step 1:** In a two-necked round bottom flask equipped with a dropping funnel, 2.1 mL formaldehyde (37 wt% in water, 28 mmol) were dissolved in 24 mL dioxane together with 2 mL  $\text{H}_2\text{O}$  and 26 mL glacial acetic acid. The flask was immersed in an ice bath and dimethylamine (40 wt% in water, 3.47 mL, 28 mmol) was added at once. To this mixture, 26 mmol of the desired indole, dissolved in 24 mL dioxane, were added dropwise. After the addition of the indole, the mixture was allowed to stir for 2 h at  $0^\circ\text{C}$ , then for 12 h at rt. The mixture was then diluted with 32 mL water and 1.5 g of Celite was added. After stirring for 10 minutes, the mixture was filtered off over Celite and the filtrate was treated with 2N NaOH. The precipitate was recovered by filtration, washed with water and dried under vacuum to afford the product **I**.<sup>1</sup>

**Step 2:** Sodium (0.23 g, 10 mmol) was dissolved in absolute ethanol (30 mL). diethyl 2-formamidomalonate (1.74 g, 10 mmol) and ethyl formamidomalonate **I** (2.03 g, 10 mmol) were added to this solution followed by the slow addition of dimethyl sulfate (2.52 g). The solution was allowed to stand at room temperature for 4 h, and the white precipitate that formed was poured into water, filtered, and dried. The yield of the title compound **II** was 90-99%.<sup>2</sup>

**Step 3:** **II** (3 mmol, 1.0 equiv) was dissolved in dry DCM (30 mL) and Et<sub>3</sub>N (4 equiv), cooled to -20 °C. To mixture POCl<sub>3</sub> (1.2 equiv) was added, dropwise slowly. The reaction mixture was stirred for 2 h. Then, 10 mL of H<sub>2</sub>O was added slowly to the reaction mixture at -20 °C The crude reaction mixture was extracted with DCM (100 mL × 3) and washed with brine (100 mL). The organic phase was concentrated in *vacuo* and the residue was purified by silica gel flash column chromatography to afford the product **III** as a colourless oil in 90-98% yield.<sup>3</sup>

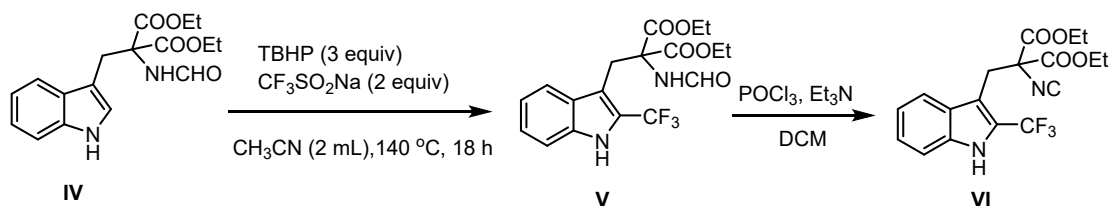

Similar procedures (**IV**) according to the above general procedure (step 1, step 2). **IV** (0.3 mmol), CF<sub>3</sub>SO<sub>2</sub>Na (0.6 mmol, 2 equiv), TBHP (0.9 mmol, 3 equiv) and CH<sub>3</sub>CN (2 mL) were added into a sealed Pyrex test tube stirred at 140 °C under air. The reaction was stopped about 18 h and cooled to room temperature. Then, the crude product was purified by column chromatography on silica gel using ethyl acetate and petroleum ether as the developing solvent to give the products **V**.<sup>4</sup>

Similar procedures (**VI**) according to the above general procedure (step 3), and the substrate **VI** was obtained as colorless oil.

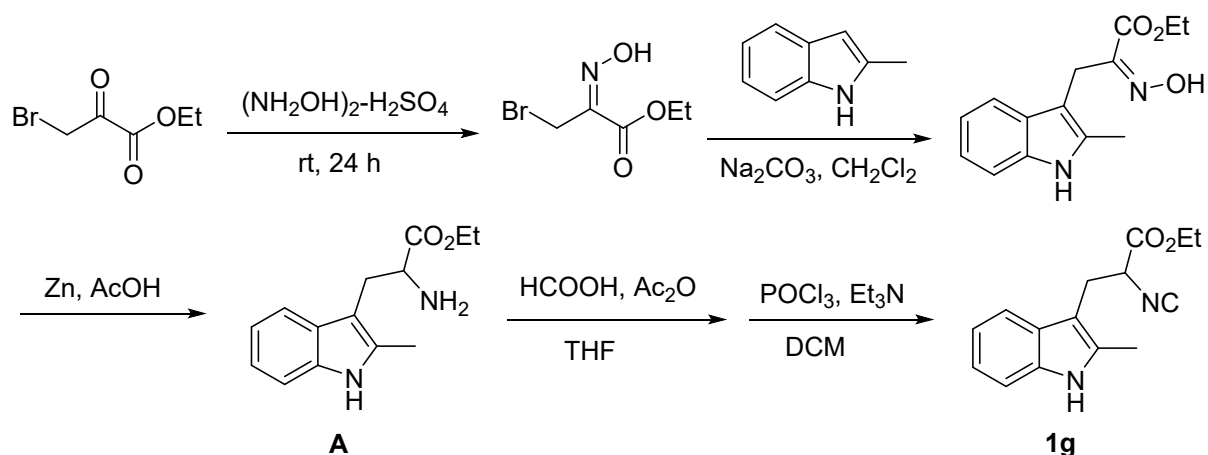

**Step 1:** A solution of hydroxylamine sulfate (0.5 g, 3.1 mmol) in water (3.0 mL) was added to a solution of ethylbromopyruvate (90%) (0.65 g, 3.0 mmol) in  $\text{CHCl}_3$  (1.0 mL). The two-phase system was rapidly stirred for 24 h at room temperature. The mixture was extracted with  $\text{CHCl}_3$  (30 mL). The combined extracts were dried over  $\text{Na}_2\text{SO}_4$  and concentrated to give the title compound (0.62 g, 99%) as a white solid.

**Step 2:** A solution of 3-bromo-2-hydroxy-yimino-propionic acid ethyl ester (0.38 g, 1.8 mmol) in  $\text{CH}_2\text{Cl}_2$  (2.0 mL) was slowly added dropwise to a stirring mixture of 2-methyl-1*H*-indole (0.24 g, 1.8 mmol) and  $\text{Na}_2\text{CO}_3$  (1.05 g, 9.9 mmol) in  $\text{CH}_2\text{Cl}_2$  (3.0 mL) at room temperature. The mixture was stirred for 20 h, filtered through celite and concentrated to give the title compound (0.41 g, 87%).

**Step 3:** Zinc powder (0.39 g, 6.0 mmol) was added portionwise to a stirred solution of ethyl(*Z*)-2-(hydroxyimino)-3-(2-methyl-1*H*-indol-3-yl)-propanoate (0.39 g, 1.5 mmol) in acetic acid (10 mL) over 30 min. After stirring overnight, the mixture was filtered through celite and concentrated. The residue was dissolved in HCl (1.0 M) and reevaporated to give the title compound (0.35 g, 95%).

**Step 4:** A mixture of  $\text{HCO}_2\text{H}$  (3.5 equiv),  $\text{Ac}_2\text{O}$  (1.5 equiv) was stirred at rt for 30 min. To this mixture, a solution of **A** (1.4 mmol, 1.0 equiv) in THF was added slowly. After completion of the reaction, the reaction was quenched by adding saturated aqueous  $\text{NaHCO}_3$ . The organic layer was separated, and the aqueous layer was extracted with  $\text{CH}_2\text{Cl}_2$  (40 mL  $\times$  3). The combined organic phase was washed with brine (40 mL), dried over  $\text{MgSO}_4$ . The concentrated residue was used for next step without further purification. The product was dissolved in dry DCM (30 mL) and  $\text{Et}_3\text{N}$  (4.0 equiv), cooled to  $-20\text{ }^\circ\text{C}$ . To mixture  $\text{POCl}_3$  (1.2 equiv) was added, dropwise slowly. The reaction mixture was stirred for 2 h. Then, 10 mL of  $\text{H}_2\text{O}$  was

added slowly to the reaction mixture at -20 °C The crude reaction mixture was extracted with DCM (100 mL×3) and washed with brine (100 mL). The organic phase was concentrated in vacuo and the residue was purified by silica gel flash column chromatography to afford the product **1g** (1.05 mmol, 75%) as a colorless liquid.

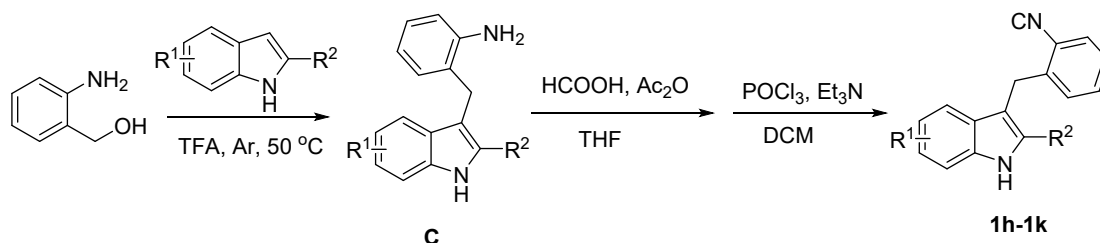

**Step 1:** To a solution of (2-aminophenyl)methanol (9.8 mmol) and 2-methyl-1H-indole (12.74 mmol) in 1,2-dichloroethane (40 mL). After degassing with argon and four evacuation/backfill cycles with argon, trifluoroacetic acid (3.92 mmol) was added dropwise, then the mixture was heated with heating mantle and stirred at 50 °C. When the reaction was complete as monitored by TLC, aqueous solution of saturated Na<sub>2</sub>CO<sub>3</sub> was added, concentrated under reduced pressure, dilute hydrochloric acid was added, and the mixture was extracted with dichloromethane three times. The combined organic layer was dried over anhydrous Na<sub>2</sub>SO<sub>4</sub>, filtered, and evaporated, and the resulting mixture was purified by column chromatography on silica gel to afford the product 2-((2-methyl-1H-indol-3-yl)methyl)aniline (1.618 g, 70%)

**Step 2:** A mixture of HCO<sub>2</sub>H (3.5 equiv), Ac<sub>2</sub>O (1.5 equiv) was stirred at rt for 30 min. To this mixture, a solution of **C** (1.0 equiv) in THF was added slowly. After completion of the reaction, the reaction was quenched by adding saturated aqueous NaHCO<sub>3</sub>. The organic layer was separated, and the aqueous layer was extracted with CH<sub>2</sub>Cl<sub>2</sub> (40 mL × 3). The combined organic phase was washed with brine (40 mL), dried over MgSO<sub>4</sub>. The concentrated residue was used for next step without further purification. The product was dissolved in dry DCM (30 mL) and Et<sub>3</sub>N (4.0 equiv), cooled to -20 °C. To mixture POCl<sub>3</sub> (1.2 equiv) was added, dropwise slowly. The reaction mixture was stirred for 2 h. Then, 10 mL of H<sub>2</sub>O was added slowly to the reaction mixture at -20 °C The crude reaction mixture was extracted with DCM (100 mL×3) and washed with brine (100 mL). The organic phase was concentrated in *vacuo* and the residue was purified by silica gel flash column chromatography to

afford the product **1h-1k** as a colourless oil.

### General procedure for the spirocyclization reaction

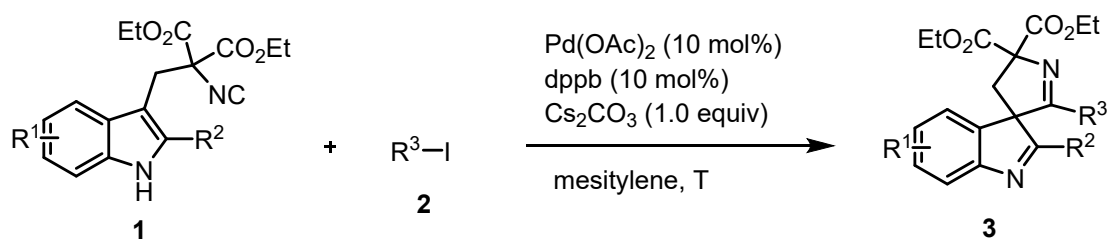

To a mixture of R<sup>3</sup>I (0.15 mmol), Pd(OAc)<sub>2</sub> (10 mol%), dppb (10 mol%), Cs<sub>2</sub>CO<sub>3</sub> (0.1 mmol) in mesitylene (1 mL) was added of **1** (1.0 mol) in mesitylene (1 mL) via a syringe pump during a period of 1.5 h under Ar at 75 °C. The reaction mixture was quenched with water and the aqueous layer was extracted with ethyl acetate. The combined organic layers were dried over anhydrous Na<sub>2</sub>SO<sub>4</sub> and evaporated under *vacuo*. The residue was purified by silica gel flash column chromatography to afford the product **3**.

### Ligand screening for enantioselective synthesis of spiroindolines

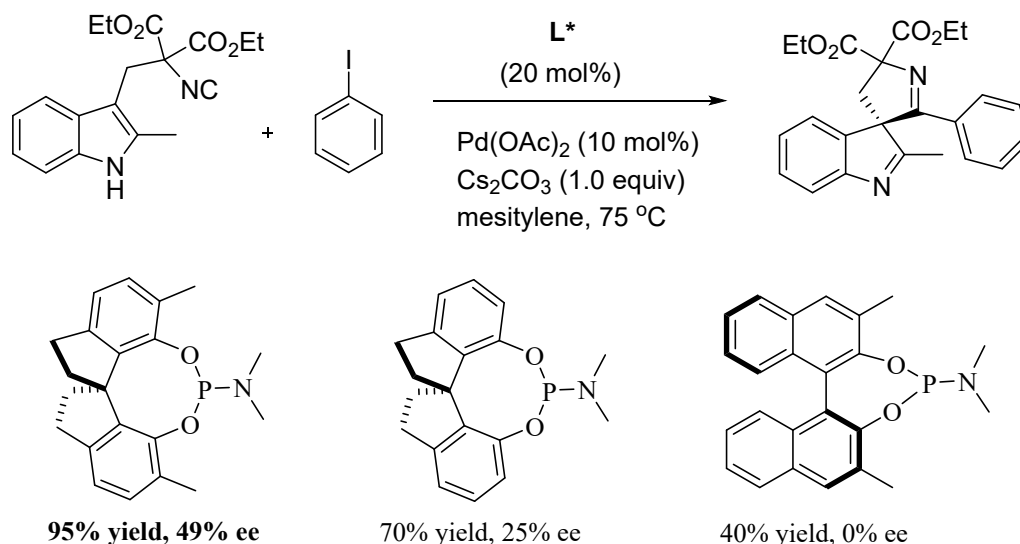

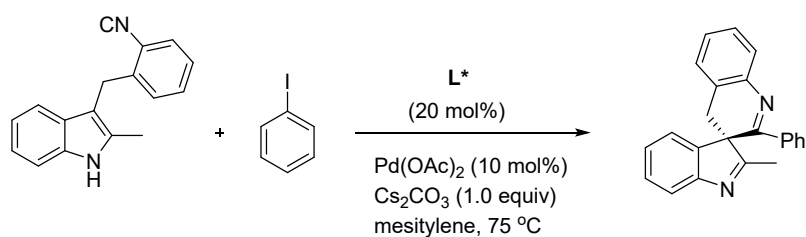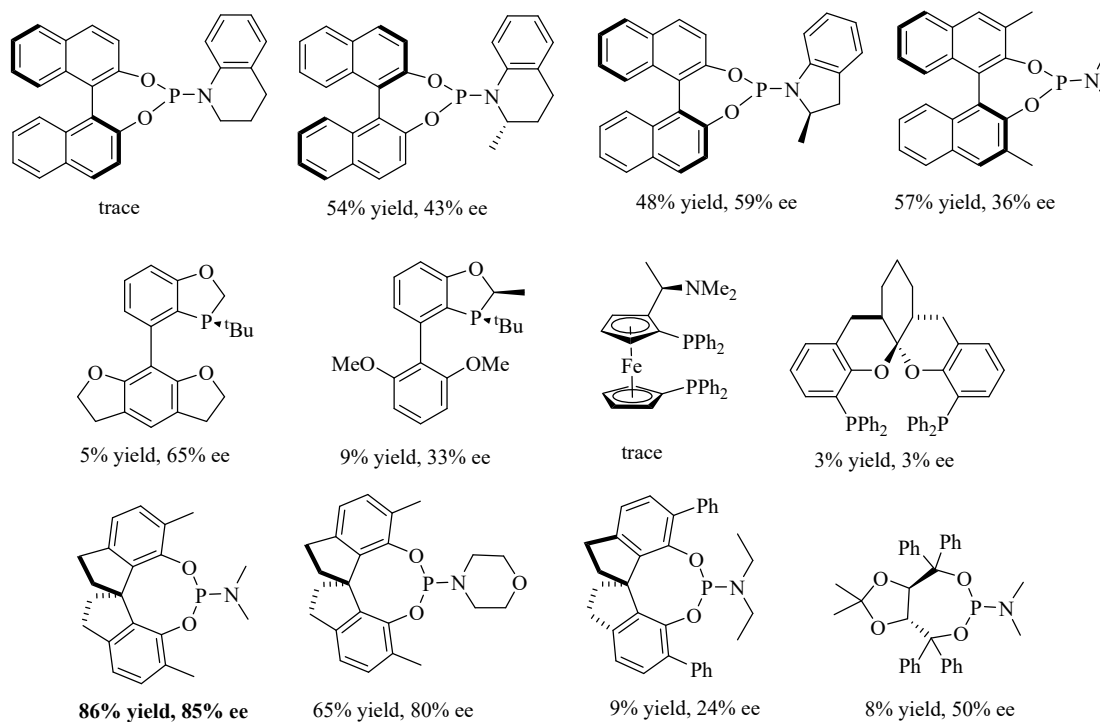

## References:

- (1) S. Li, S. Zard, *Org. Lett.* 2013, **15**, 5898–5901.
- (2) T. Hagen, K. Narayanan, J. Names, J. Cook, *J. Org. Chem.* 1989, **54**, 2170–2178.
- (3) S. Tang, S. Yang, H. Sun, Y. Zhou, J. Li, Q. Zhu, *Org. Lett.* 2018, **20**, 1832–1836.
- (4) J. Xie, Z. Wang, G. Jiang, *RSC Adv.*, 2019, **9**, 35098–35101.

### 3. Characterization data

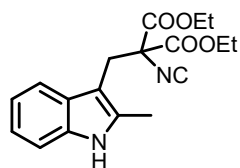

#### diethyl 2-isocyano-2-((2-methyl-1H-indol-3-yl)methyl)malonate (**1a**):

Prepared from diethyl 2-formamido-2-((2-methyl-1H-indol-3-yl)methyl)malonate (1.04 g, 3 mmol, 1.0 equiv) and Et<sub>3</sub>N (1.21 g, 12 mmol, 4.0 equiv), and POCl<sub>3</sub> (0.34 ml, 3.6 mmol, 1.2 equiv) according to the general procedure. The product **1a** was isolated as colorless oil (905 mg, 2.76 mmol, 92% yield). (new compound). **<sup>1</sup>H NMR** (400 MHz, CDCl<sub>3</sub>) δ: 8.04 (s, 1H), 7.45 (d, *J* = 7.6 Hz, 1H), 7.22 (d, *J* = 8.0 Hz, 1H), 7.10-7.02 (m, 2H), 4.22 (q, *J* = 7.1 Hz, 4H), 3.70 (s, 2H), 2.46 (s, 3H), 1.20 (t, *J* = 7.2 Hz, 6H); **<sup>13</sup>C NMR** (100 MHz, CDCl<sub>3</sub>) δ: 164.3, 163.5, 135.1, 134.9, 128.3, 121.3, 119.4, 118.2, 110.3, 102.7, 70.0, 63.7, 31.5, 13.6, 12.6. **HRMS (ESI)** ([M+H]<sup>+</sup>) calculated for C<sub>18</sub>H<sub>21</sub>N<sub>2</sub>O<sub>4</sub>: 329.1496, found: 329.1491.

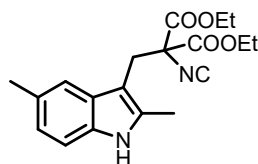

#### diethyl 2-((2,5-dimethyl-1H-indol-3-yl)methyl)-2-isocyanomalonate (**1b**):

Prepared from diethyl 2-((2,5-dimethyl-1H-indol-3-yl)methyl)-2-formamidomalonate (1.08 g, 3 mmol, 1.0 equiv) and Et<sub>3</sub>N (1.21 g, 12 mmol, 4.0 equiv), and POCl<sub>3</sub> (0.34 ml, 3.6 mmol, 1.2 equiv) according to the general procedure. The product **1b** was isolated as colorless oil (902 mg, 2.64 mmol, 88% yield). (new compound). **<sup>1</sup>H NMR** (400 MHz, CDCl<sub>3</sub>) δ: 8.30 (s, 1H), 7.00 (d, *J* = 8.2 Hz, 1H), 6.84 (dd, *J* = 8.3, 1.2 Hz, 1H), 4.19 (q, *J* = 7.1 Hz, 4H), 3.65 (s, 2H), 2.38 (s, 3H), 2.33 (s, 3H), 1.18 (t, *J* = 7.1 Hz, 6H); **<sup>13</sup>C NMR** (100 MHz, CDCl<sub>3</sub>) δ: 164.0, 163.1, 135.0, 133.3, 128.9, 127.8, 122.2, 117.4, 109.9, 101.4, 69.9, 63.4, 31.3, 21.2, 13.3, 12.1. **HRMS (ESI)** ([M+H]<sup>+</sup>) calculated for C<sub>19</sub>H<sub>23</sub>N<sub>2</sub>O<sub>4</sub>: 343.1652, found: 343.1654.



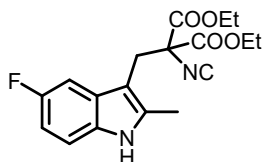

**diethyl 2-((5-fluoro-2-methyl-1H-indol-3-yl)methyl)-2-isocyanomalonate (1c):**

Prepared from diethyl 2-((5-fluoro-2-methyl-1H-indol-3-yl)methyl)-2-formamidomalonate (1.09 g, 3 mmol, 1.0 equiv) and Et<sub>3</sub>N (1.21 g, 12 mmol, 4.0 equiv), and POCl<sub>3</sub> (0.34 ml, 3.6 mmol, 1.2 equiv) according to the general procedure. The product **1c** was isolated as colorless oil (913 mg, 2.64 mmol, 88% yield). (new compound). <sup>1</sup>H NMR (400 MHz, CDCl<sub>3</sub>) δ: 8.31 (s, 1H), 7.07 (dd, *J* = 10.0, 2.4 Hz, 1H), 7.02 (dd, *J* = 8.7, 4.5 Hz, 1H), 6.75 (td, *J* = 9.1, 2.6 Hz, 1H), 4.27-4.22 (m, 4H), 3.64 (s, 2H), 2.37 (s, 3H), 1.23 (t, *J* = 7.2 Hz, 6H); <sup>13</sup>C NMR (100 MHz, CDCl<sub>3</sub>) δ: 164.0, 163.3, 157.6 (d, *J* = 232.1 Hz), 137.0, 131.5, 128.5 (d, *J* = 9.8 Hz), 110.9 (d, *J* = 9.6 Hz), 109.0 (d, *J* = 25.9 Hz), 102.9 (d, *J* = 24.1 Hz), 102.4 (d, *J* = 4.3 Hz), 70.0, 63.7, 31.3, 13.5, 12.3. HRMS (ESI) ([M+H]<sup>+</sup>) calculated for C<sub>18</sub>H<sub>20</sub>FN<sub>2</sub>O<sub>4</sub>: 347.1402, found: 347.1400.

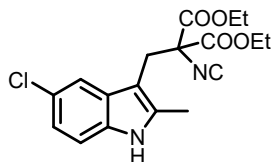

**diethyl 2-((5-chloro-2-methyl-1H-indol-3-yl)methyl)-2-isocyanomalonate (1d):**

Prepared from diethyl 2-((5-chloro-2-methyl-1H-indol-3-yl)methyl)-2-formamidomalonate (1.14 g, 3 mmol, 1.0 equiv) and Et<sub>3</sub>N (1.21 g, 12 mmol, 4.0 equiv), and POCl<sub>3</sub> (0.34 ml, 3.6 mmol, 1.2 equiv) according to the general procedure. The product **1d** was isolated as colorless oil (958 mg, 2.52 mmol, 84% yield). (new compound). <sup>1</sup>H NMR (400 MHz, CDCl<sub>3</sub>) δ: 8.17 (s, 1H), 7.35 (d, *J* = 1.8 Hz, 1H), 7.06 (d, *J* = 8.6 Hz, 1H), 6.98 (dd, *J* = 8.6, 1.9 Hz, 1H), 4.30-4.24 (m, 4H), 3.64 (s, 2H), 2.43 (s, 3H), 1.27 (t, *J* = 7.2 Hz, 6H); <sup>13</sup>C NMR (100 MHz, CDCl<sub>3</sub>) δ: 164.1, 163.5, 136.7, 133.4, 129.3, 125.1, 121.3, 117.3, 111.4, 102.3, 70.1, 63.9, 31.2, 13.6, 12.6. HRMS (ESI) ([M+H]<sup>+</sup>) calculated for C<sub>18</sub>H<sub>20</sub>ClN<sub>2</sub>O<sub>4</sub>: 363.1106, found: 363.1113.

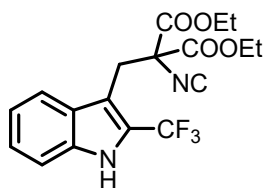

**diethyl 2-isocyano-2-((2-(trifluoromethyl)-1H-indol-3-yl)methyl)malonate (1e):**

Prepared from diethyl 2-formamido-2-((2-(trifluoromethyl)-1H-indol-3-yl)methyl)malonate (0.40 g, 1.0 mmol, 1.0 equiv) and Et<sub>3</sub>N (0.40 g, 4.0 mmol, 4.0 equiv), and POCl<sub>3</sub> (0.11 ml, 1.2 mmol, 1.2 equiv) according to the general procedure. The product **1e** was isolated as colorless oil (357 mg, 0.93 mmol, 93% yield). (new compound). <sup>1</sup>H NMR (400 MHz, CDCl<sub>3</sub>) δ: 9.01, 7.62 (d, *J* = 8.1 Hz, 1H), 7.29 (d, *J* = 8.2 Hz, 1H), 7.25-7.21 (m, 1H), 7.15-7.11 (m, 1H), 4.29-4.24 (m, 4H), 3.90 (s, 2H), 1.22 (t, *J* = 7.1 Hz, 6H); <sup>13</sup>C NMR (100 MHz, CDCl<sub>3</sub>) δ: 164.1, 135.3, 126.8, 124.9, 124.0 (q, *J* = 36.7 Hz), 121.5 (q, *J* = 267.9 Hz), 120.7, 120.2, 117.5, 108.2, 108.2, 69.6, 64.0, 30.1, 13.5. **HRMS (ESI)** ([M+H]<sup>+</sup>) calculated for C<sub>18</sub>H<sub>18</sub>F<sub>3</sub>N<sub>2</sub>O<sub>4</sub>: 383.1213, found: 383.1214.

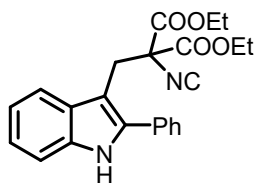

**diethyl 2-isocyano-2-((2-phenyl-1H-indol-3-yl)methyl)malonate (1f):**

Prepared from diethyl 2-formamido-2-((2-phenyl-1H-indol-3-yl)methyl)malonate (0.41 g, 1.0 mmol, 1.0 equiv) and Et<sub>3</sub>N (0.40 g, 4.0 mmol, 4.0 equiv), and POCl<sub>3</sub> (0.11 ml, 1.2 mmol, 1.2 equiv) according to the general procedure. The product **1f** was isolated as colorless oil (323 mg, 0.83 mmol, 83% yield). (new compound). <sup>1</sup>H NMR (400 MHz, CDCl<sub>3</sub>) δ: 8.24 (s, 1H), 7.64 (d, *J* = 7.9 Hz, 1H), 7.56-7.54 (m, 2H), 7.45-7.32 (m, 4H), 7.20-7.10 (m, 2H), 4.12-4.04 (m, 2H), 4.00-3.92 (m, 4H), 1.12 (t, *J* = 7.1 Hz, 6H); <sup>13</sup>C NMR (100 MHz, CDCl<sub>3</sub>) δ: 164.0, 163.7, 137.7, 135.5, 132.7, 128.8, 128.8, 128.7, 128.0, 122.3, 119.7, 119.3, 111.0, 103.0, 69.6, 63.4, 30.5, 13.5. **HRMS (ESI)** ([M+H]<sup>+</sup>) calculated for C<sub>23</sub>H<sub>23</sub>N<sub>2</sub>O<sub>4</sub>: 391.1652, found: 391.1649.

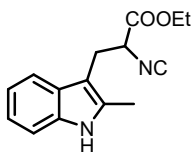

**ethyl 2-isocyano-3-(2-methyl-1H-indol-3-yl)propanoate (1g):**

The product **1g** was isolated as a colorless liquid (192.2 mg, 0.75 mmol, 75% yield). (new compound). <sup>1</sup>H NMR (400 MHz, CDCl<sub>3</sub>) δ: 8.00 (s, 1H), 7.49 (d, *J* = 7.2 Hz, 1H), 7.31 (d, *J* = 7.2 Hz, 1H), 7.19-7.11 (m, 2H), 4.51 (dd, *J* = 8.6, 5.0 Hz, 1H), 4.26 (q, *J* = 7.1 Hz, 2H), 3.48-3.42 (m, 1H), 3.34 (dd, *J* = 14.6, 8.6 Hz, 1H), 2.49 (s, 3H), 1.28 (t, *J* = 7.1 Hz, 3H). <sup>13</sup>C NMR (100 MHz, CDCl<sub>3</sub>) δ: 166.7, 160.2, 135.2, 133.8, 127.8, 121.5, 119.6, 117.3, 110.5, 104.7, 62.7, 57.2, 28.9, 13.9, 11.9. HRMS (ESI) ([M+H]<sup>+</sup>) calculated for C<sub>15</sub>H<sub>17</sub>N<sub>2</sub>O<sub>2</sub>: 257.1285, found: 257.1282.

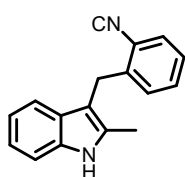

### 3-(2-isocyanobenzyl)-2-methyl-1H-indole (**1h**):

The product **1h** was isolated as a colorless liquid (197 mg, 0.80 mmol, 80% yield). (new compound). <sup>1</sup>H NMR (400 MHz, CDCl<sub>3</sub>) δ: 7.75 (s, 1H), 7.40 (d, *J* = 7.8 Hz, 1H), 7.27 (d, *J* = 7.5 Hz, 1H), 7.18 (dd, *J* = 23.4, 9.3 Hz, 4H), 7.02 (t, *J* = 7.2 Hz, 1H), 6.92 (t, *J* = 7.0 Hz, 1H), 4.28 (s, 2H), 2.37 (s, 3H). <sup>13</sup>C NMR (100 MHz, CDCl<sub>3</sub>) δ: 166.2, 137.8, 135.3, 132.4, 129.5, 129.3, 128.6, 126.7, 126.6, 125.9, 121.2, 119.4, 118.1, 110.3, 107.9, 26.3, 11.8. HRMS (ESI) ([M+H]<sup>+</sup>) calculated for C<sub>17</sub>H<sub>15</sub>N<sub>2</sub>: 247.1230, found: 247.1227.

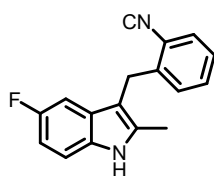

### 5-fluoro-3-(2-isocyanobenzyl)-2-methyl-1H-indole (**1i**):

The product **1i** was isolated as a colorless liquid (208 mg, 0.80 mmol, 80% yield). (new compound) <sup>1</sup>H NMR (400 MHz, CDCl<sub>3</sub>) δ: 7.90 (s, 1H), 7.41-7.38 (m, 1H), 7.21 (ddd, *J* = 8.3, 4.9, 3.4 Hz, 3H), 7.05-7.02 (m, 1H), 6.92 (dd, *J* = 9.8, 2.5 Hz, 1H), 6.88- 6.82 (m, 1H), 4.14 (s, 2H), 2.40 (s, 3H). <sup>13</sup>C NMR (100 MHz, CDCl<sub>3</sub>) δ: 166.3, 157.8 (d, *J* = 232.6 Hz), 137.4, 134.5 (d, *J* = 3.6 Hz), 131.7, 129.4 (d, *J* = 4.4

Hz), 129.1, 129.0, 126.9, 126.8, 110.9, 110.8, 109.2 (d,  $J = 26.0$  Hz), 108.1 (d,  $J = 4.3$  Hz), 103.2 (d,  $J = 25.5$  Hz), 26.4, 11.9.  $^{19}\text{F}$  NMR (376 MHz,  $\text{CDCl}_3$ )  $\delta$ : -124.57. **HRMS (ESI)** ( $[\text{M}+\text{H}]^+$ ) calculated for  $\text{C}_{17}\text{H}_{14}\text{FN}_2$ : 265.1136, found: 265.1131.

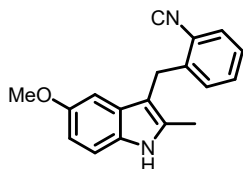

### 3-(2-isocyanobenzyl)-5-methoxy-2-methyl-1H-indole (1j):

The product **1j** was isolated as colorless oil (180 mg, 0.76 mmol, 75% yield). (new compound)  $^1\text{H}$ NMR (400 MHz,  $\text{CDCl}_3$ )  $\delta$ : 7.83 (s, 1H), 7.42-7.37 (m, 1H), 7.23-7.16 (m, 3H), 7.09-.04 (m, 1H), 6.79 (dd,  $J = 5.5, 2.3$  Hz, 2H), 4.16 (s, 2H), 3.78 (s, 3H), 2.38 (s, 3H).  $^{13}\text{C}$  NMR (100 MHz,  $\text{CDCl}_3$ )  $\delta$ : 166.2, 154.0, 137.7, 133.3, 130.4, 129.5, 129.3, 129.1, 126.7, 126.7, 125.9, 110.9, 110.8, 107.8, 100.6, 55.9, 26.4, 11.9. **HRMS (ESI)** ( $[\text{M}+\text{H}]^+$ ) calculated for  $\text{C}_{18}\text{H}_{17}\text{N}_2\text{O}$ : 277.1335, found: 277.1327.

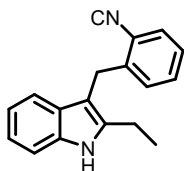

### 2-ethyl-3-(2-isocyanobenzyl)-1H-indole (1k):

The product **1k** was isolated as colorless oil (198 mg, 0.76 mmol, 76% yield). (new compound).  $^1\text{H}$ NMR (400 MHz,  $\text{CDCl}_3$ )  $\delta$ : 8.06 (s, 1H), 7.44-7.41 (m, 1H), 7.36 (d,  $J = 8.7$  Hz, 2H), 7.22-7.16 (m, 3H), 7.11-7.05 (m, 2H), 4.25 (s, 2H), 2.80 (q,  $J = 7.6$  Hz, 2H), 1.29 (t,  $J = 7.6$  Hz, 3H).  $^{13}\text{C}$  NMR (100 MHz,  $\text{CDCl}_3$ )  $\delta$ : 166.3, 138.5, 138.0, 135.5, 129.5, 129.5, 128.7, 126.8, 126.7, 126.0, 121.3, 119.5, 118.4, 110.6, 106.9, 26.2, 19.6, 14.2. **HRMS (ESI)** ( $[\text{M}+\text{H}]^+$ ) calculated for  $\text{C}_{18}\text{H}_{17}\text{N}_2$ : 261.1386, found: 265.1131.

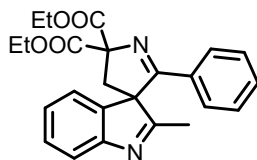

**diethyl 2-methyl-2'-(phenyl)spiro[indole-3,3'-pyrrole]-5',5'(4'H)-dicarboxylate (3a):**

Prepared from diethyl 2-isocyano-2-((2-methyl-1H-indol-3-yl)methyl)malonate (32.8 mg, 0.1 mmol, 1.0 equiv) and iodobenzene (30.6 mg, 0.15 mmol, 1.5 equiv) according to the general procedure. The product **3a** was isolated as colorless oil (39.6 mg, 0.098 mmol, 98% yield). (new compound). **<sup>1</sup>H NMR** (400 MHz, CDCl<sub>3</sub>)  $\delta$ : 7.63 (d,  $J = 7.7$  Hz, 1H), 7.40 (t,  $J = 7.6$  Hz, 1H), 7.34-7.28 (m, 4H), 7.21-7.14 (m, 3H), 7.45-7.36 (m, 4H), 3.23 (d,  $J = 14.7$  Hz, 1H), 2.85 (d,  $J = 14.7$  Hz, 1H), 2.23 (s, 3H), 1.37 (q,  $J = 6.6$  Hz, 6H); **<sup>13</sup>C NMR** (100 MHz, CDCl<sub>3</sub>)  $\delta$ : 182.0, 174.7, 169.8, 169.3, 154.6, 141.9, 131.6, 131.5, 129.0, 128.5, 127.9, 126.6, 122.7, 120.6, 85.9, 75.0, 62.7, 62.6, 40.2, 16.4, 16.1. **HRMS (ESI)** ( $[M+H]^+$ ) calculated for C<sub>24</sub>H<sub>25</sub>N<sub>2</sub>O<sub>4</sub>: 405.1809, found: 405.1806.

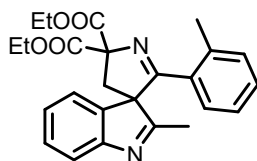

**diethyl 2-methyl-2'-(o-tolyl)spiro[indole-3,3'-pyrrole]-5',5'(4'H)-dicarboxylate (3b):**

Prepared from diethyl 2-isocyano-2-((2-methyl-1H-indol-3-yl)methyl)malonate (32.8 mg, 0.1 mmol, 1.0 equiv) and 1-iodo-2-methylbenzene (32.7 mg, 0.15 mmol, 1.5 equiv) according to the general procedure. The product **3b** was isolated as colorless oil (28.8 mg, 0.069 mmol, 69% yield). (new compound). **<sup>1</sup>H NMR** (400 MHz, CDCl<sub>3</sub>)  $\delta$ : 7.50 (d,  $J = 8.3$  Hz, 1H), 7.37-7.33 (m, 2H), 7.23-7.19 (m, 1H), 7.14-7.11 (m, 2H), 6.82-6.77 (m, 1H), 6.33 (d,  $J = 7.8$  Hz, 1H), 4.43-4.37 (m, 4H), 6.45 (d,  $J = 14.7$  Hz, 1H), 2.92 (d,  $J = 14.7$  Hz, 1H), 2.51 (s, 3H), 2.28 (s, 3H), 1.38 (t,  $J = 7.2$  Hz, 6H); **<sup>13</sup>C NMR** (100 MHz, CDCl<sub>3</sub>)  $\delta$ : 180.3, 176.2, 169.8, 169.4, 154.9, 141.0, 137.9, 131.4, 131.0, 129.9, 129.0, 126.4, 126.1, 125.3, 122.4, 120.3, 87.1, 62.6, 38.9, 20.9, 16.6, 14.1. **HRMS (ESI)** ( $[M+H]^+$ ) calculated for C<sub>25</sub>H<sub>27</sub>N<sub>2</sub>O<sub>4</sub>: 419.1965, found: 419.1971.

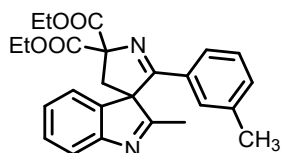

**diethyl 2-methyl-2'-(m-tolyl)spiro[indole-3,3'-pyrrole]-5',5'(4'H)-dicarboxylate (3c):**

Prepared from diethyl 2-isocyano-2-((2-methyl-1H-indol-3-yl)methyl)malonate (32.8 mg, 0.1 mmol, 1.0 equiv) and 1-iodo-3-methylbenzene (32.7 mg, 0.15 mmol, 1.5 equiv) according to the general procedure. The product **3c** was isolated as colorless oil (37.2 mg, 0.089 mmol, 89% yield). (new compound). **<sup>1</sup>H NMR** (400 MHz, CDCl<sub>3</sub>)  $\delta$ : 7.63 (d,  $J = 7.7$  Hz, 1H), 7.41-7.38 (m, 2H), 7.27 (d,  $J = 5.3$  Hz, 1H), 7.21-7.17 (m, 1H), 7.13 (d,  $J = 7.6$  Hz, 1H), 6.99 (t,  $J = 7.7$  Hz, 1H), 6.80 (d,  $J = 7.9$  Hz, 1H), 4.43-4.36 (m, 4H), 3.23 (d,  $J = 14.7$  Hz, 1H), 2.84 (d,  $J = 14.7$  Hz, 1H), 2.23 (s, 3H), 2.21 (s, 3H), 1.37 (q,  $J = 6.9$  Hz, 6H); **<sup>13</sup>C NMR** (100 MHz, CDCl<sub>3</sub>)  $\delta$ : 182.0, 174.8, 169.8, 169.3, 154.6, 142.0, 138.2, 132.5, 131.3, 129.0, 128.7, 128.4, 126.6, 124.6, 122.6, 120.5, 85.8, 74.9, 62.7, 62.6, 40.1, 21.1, 16.4, 14.0. **HRMS (ESI)** ( $[M+H]^+$ ) calculated for C<sub>25</sub>H<sub>27</sub>N<sub>2</sub>O<sub>4</sub>: 419.1965, found: 419.1967.

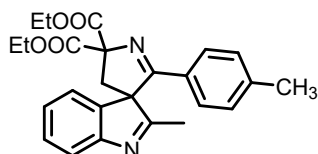

**diethyl 2-methyl-2'-(p-tolyl)spiro[indole-3,3'-pyrrole]-5',5'(4'H)-dicarboxylate (3d):**

Prepared from diethyl 2-isocyano-2-((2-methyl-1H-indol-3-yl)methyl)malonate (32.8 mg, 0.1 mmol, 1.0 equiv) and 1-iodo-4-methylbenzene (32.7 mg, 0.15 mmol, 1.5 equiv) according to the general procedure. The product **3d** was isolated as colorless oil (40.1 mg, 0.096 mmol, 96% yield). (new compound). **<sup>1</sup>H NMR** (400 MHz, CDCl<sub>3</sub>)  $\delta$ : 7.54 (d,  $J = 7.7$  Hz, 1H), 7.73-7.28 (m, 1H), 7.18 (d,  $J = 7.7$  Hz, 1H), 7.13-7.08 (m, 3H), 6.85 (d,  $J = 8.1$  Hz, 2H), 4.35-4.27 (m, 4H), 3.14 (d,  $J = 14.7$  Hz, 1H), 2.75 (d,  $J = 14.7$  Hz, 1H), 2.17 (s, 3H), 2.14 (s, 3H), 1.29 (td,  $J = 7.2, 5.7$  Hz, 6H); **<sup>13</sup>C NMR** (100 MHz, CDCl<sub>3</sub>)  $\delta$ : 182.1, 174.4, 169.8, 269.4, 154.7, 142.2, 142.1, 129.2, 128.9, 128.8, 127.9, 126.5, 122.6, 120.5, 85.8, 74.9, 62.6, 62.5, 40.2, 21.3, 16.3, 14.0. **HRMS (ESI)** ( $[M+H]^+$ ) calculated for C<sub>25</sub>H<sub>27</sub>N<sub>2</sub>O<sub>4</sub>: 419.1965, found: 419.1967.

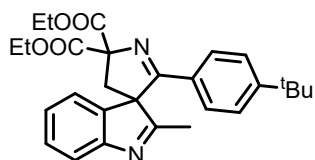

**diethyl 2'-((4-(tert-butyl)phenyl)methyl)-2-methylspiro[indole-3,3'-pyrrole]-5',5'-(4'H)-dicarboxylate (3e):**

Prepared from diethyl 2-isocyano-2-((2-methyl-1H-indol-3-yl)methyl)malonate (32.8 mg, 0.1 mmol, 1.0 equiv) and 1-(tert-butyl)-4-iodobenzene (39.0 mg, 0.15 mmol, 1.5 equiv) according to the general procedure. The product **3e** was isolated as colorless oil (33.1 mg, 0.072 mmol, 72% yield). (new compound). <sup>1</sup>H NMR (400 MHz, CDCl<sub>3</sub>) δ: 7.64 (d, *J* = 7.7 Hz, 1H), 7.40 (t, *J* = 7.2 Hz, 1H), 7.29-7.24 (m, 4H), 7.21-7.16 (m, 3H), 4.41-4.35 (m, 4H), 3.22 (d, *J* = 14.7 Hz, 1H), 2.83 (d, *J* = 14.7 Hz, 1H), 2.23 (s, 3H), 1.37 (q, *J* = 6.5 Hz, 6H), 1.21 (s, 9H); <sup>13</sup>C NMR (100 MHz, CDCl<sub>3</sub>) δ: 182.3, 174.6, 169.8, 169.4, 155.1, 154.6, 142.2, 128.9, 128.6, 127.7, 126.5, 125.5, 122.5, 120.5, 85.8, 74.8, 62.6, 62.5, 40.3, 30.9, 16.4, 14.1. HRMS (ESI) ([M+H]<sup>+</sup>) calculated for C<sub>28</sub>H<sub>33</sub>N<sub>2</sub>O<sub>4</sub>: 461.2435, found: 461.2438.

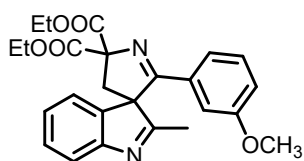

**diethyl 2'-((3-methoxyphenyl)methyl)-2-methylspiro[indole-3,3'-pyrrole]-5',5'-(4'H)-dicarboxylate (3f):**

Prepared from diethyl 2-isocyano-2-((2-methyl-1H-indol-3-yl)methyl)malonate (32.8 mg, 0.1 mmol, 1.0 equiv) and 1-iodo-3-methoxybenzene (35.1 mg, 0.15 mmol, 1.5 equiv) according to the general procedure. The product **3f** was isolated as colorless oil (33.5 mg, 0.077 mmol, 77% yield). (new compound). <sup>1</sup>H NMR (400 MHz, CDCl<sub>3</sub>) δ: 7.63 (d, *J* = 7.7 Hz, 1H), 7.40 (td, *J* = 7.6, 1.2 Hz, 1H), 7.31-7.29 (m, 1H), 7.23-7.19 (m, 1H), 7.06 (t, *J* = 8.0 Hz, 1H), 6.90-6.85 (m, 2H), 6.79-6.78 (m, 1H), 4.44-4.35 (m, 4H), 3.57 (s, 3H), 3.24 (d, *J* = 14.7 Hz, 1H), 2.85 (d, *J* = 14.7 Hz, 1H), 2.23 (s, 3H), 1.37 (q, *J* = 6.9 Hz, 6H); <sup>13</sup>C NMR (100 MHz, CDCl<sub>3</sub>) δ: 182.1, 174.6, 169.7, 169.2, 159.3, 154.6, 142.1, 132.6, 129.5, 129.0, 126.6, 122.7, 120.5, 120.3, 118.7, 111.7, 85.8, 75.0, 62.7, 62.6, 55.1, 40.1, 16.4, 14.0. HRMS (ESI) ([M+H]<sup>+</sup>) calculated for C<sub>25</sub>H<sub>27</sub>N<sub>2</sub>O<sub>5</sub>: 435.1914, found: 435.1916.

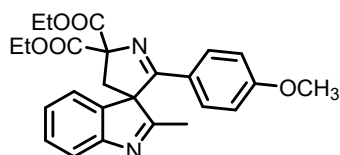

**diethyl 2'-((4-methoxyphenyl)-2-methylspiro[indole-3,3'-pyrrole]-5',5'(4'H)-dicarboxylate (3g):**

Prepared from diethyl 2-isocyano-2-((2-methyl-1H-indol-3-yl)methyl)malonate (32.8 mg, 0.1 mmol, 1.0 equiv) and 1-iodo-4-methoxybenzene (35.1 mg, 0.15 mmol, 1.5 equiv) according to the general procedure. The product **3g** was isolated as colorless oil (17.8 mg, 0.041 mmol, 41% yield). (new compound). <sup>1</sup>HNMR (400 MHz, CDCl<sub>3</sub>)  $\delta$ : 7.55 (d,  $J$  = 7.7 Hz, 1H), 7.31 (td,  $J$  = 7.6, 1.1 Hz, 1H), 7.21-7.18 (m, 3H), 7.11 (t,  $J$  = 7.5 Hz, 1H), 6.58 (d,  $J$  = 8.9 Hz, 2H), 4.35-4.27 (m, 4H), 3.65 (s, 3H), 3.14 (d,  $J$  = 14.6 Hz, 1H), 2.49 (d,  $J$  = 14.6 Hz, 1H), 2.15 (s, 3H), 1.29 (q,  $J$  = 6.6 Hz, 6H); <sup>13</sup>C NMR (100 MHz, CDCl<sub>3</sub>)  $\delta$ : 182.4, 173.7, 170.0, 169.5, 162.3, 154.6, 142.3, 129.8, 128.9, 126.6, 124.1, 122.7, 120.6, 113.9, 85.7, 74.8, 62.6, 62.5, 55.2, 40.4, 16.3, 14.1. **HRMS (ESI)** ([M+H]<sup>+</sup>) calculated for C<sub>25</sub>H<sub>27</sub>N<sub>2</sub>O<sub>5</sub>: 435.1914, found: 435.1906.

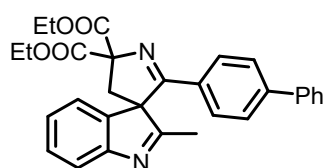

**diethyl 2'-((1,1'-biphenyl)-4-yl)-2-methylspiro[indole-3,3'-pyrrole]-5',5'(4'H)-dicarboxylate (3h):**

Prepared from diethyl 2-isocyano-2-((2-methyl-1H-indol-3-yl)methyl)malonate (32.8 mg, 0.1 mmol, 1.0 equiv) and 4-iodo-1,1'-biphenyl (42.0 mg, 0.15 mmol, 1.5 equiv) according to the general procedure. The product **3h** was isolated as colorless oil (40.4 mg, 0.084 mmol, 84% yield). (new compound). <sup>1</sup>HNMR (400 MHz, CDCl<sub>3</sub>)  $\delta$ : 7.65 (d,  $J$  = 7.7 Hz, 1H), 7.49-7.47 (m, 2H), 7.43-7.36 (m, 7H), 7.33-7.29 (m, 2H), 7.20 (td,  $J$  = 7.4, 1.0 Hz, 1H), 4.45-4.34 (m, 4H), 3.25 (d,  $J$  = 14.7 Hz, 1H), 2.87 (d,  $J$  = 14.7 Hz, 1H), 2.26 (s, 3H), 1.38 (td,  $J$  = 7.1, 6.0 Hz, 6H); <sup>13</sup>C NMR (100 MHz, CDCl<sub>3</sub>)  $\delta$ : 182.0, 174.2, 169.8, 169.3, 154.7, 144.3, 142.0, 139.8, 130.3, 129.0, 128.8, 128.4, 127.9, 127.1, 127.0, 126.6, 122.7, 120.6, 85.9, 74.9, 62.6, 62.6, 40.3, 16.4, 14.1. **HRMS (ESI)** ([M+H]<sup>+</sup>) calculated for C<sub>30</sub>H<sub>29</sub>N<sub>2</sub>O<sub>4</sub>: 481.2122, found: 481.2124.



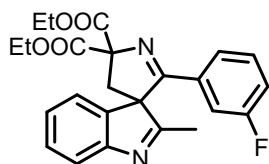

**diethyl 2'-(3-fluorophenyl)-2-methylspiro[indole-3,3'-pyrrole]-5',5'(4'H)-dicarboxylate (3i):**

Prepared from diethyl 2-isocyano-2-((2-methyl-1H-indol-3-yl)methyl)malonate (32.8 mg, 0.1 mmol, 1.0 equiv) and 1-fluoro-3-iodobenzene (33.3 mg, 0.15 mmol, 1.5 equiv) according to the general procedure. The product **3i** was isolated as colorless oil (38.0 mg, 0.090 mmol, 90% yield). (new compound). <sup>1</sup>H NMR (400 MHz, CDCl<sub>3</sub>) δ: 7.64 (d, *J* = 7.7 Hz, 1H), 7.42 (td, *J* = 7.6, 1.2 Hz, 1H), 7.28 (s, 1H), 7.23-7.19 (m, 2H), 7.13-7.08 (m, 1H), 7.05-7.00 (m, 1H), 6.87 (d, *J* = 7.8 Hz, 1H), 4.45-4.36 (m, 4H), 3.25 (d, *J* = 14.8 Hz, 1H), 2.86 (d, *J* = 14.8 Hz, 1H), 2.23 (s, 3H), 1.38 (q, *J* = 6.7 Hz, 6H); <sup>13</sup>C NMR (100 MHz, CDCl<sub>3</sub>) δ: 181.5, 173.7 (d, *J* = 2.7 Hz), 169.5, 169.1, 162.4 (d, *J* = 245.5 Hz), 154.6, 141.5, 133.4 (d, *J* = 7.8 Hz), 130.1 (d, *J* = 7.9 Hz), 129.2, 126.7, 123.3 (d, *J* = 3.1 Hz), 122.6, 120.7, 118.7 (d, *J* = 21.1 Hz), 115.0 (d, *J* = 23.2 Hz), 85.8, 62.8, 62.7, 40.1, 16.3, 14.0. **HRMS (ESI)** ([M+H]<sup>+</sup>) calculated for C<sub>24</sub>H<sub>24</sub>N<sub>2</sub>O<sub>4</sub>: 423.1715, found: 423.1714.

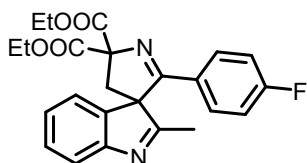

**diethyl 2'-(4-fluorophenyl)-2-methylspiro[indole-3,3'-pyrrole]-5',5'(4'H)-dicarboxylate (3j):**

Prepared from diethyl 2-isocyano-2-((2-methyl-1H-indol-3-yl)methyl)malonate (32.8 mg, 0.1 mmol, 1.0 equiv) and 1-fluoro-4-iodobenzene (33.3 mg, 0.15 mmol, 1.5 equiv) according to the general procedure. The product **3j** was isolated as colorless oil (34.2 mg, 0.081 mmol, 81% yield). (new compound). <sup>1</sup>H NMR (400 MHz, CDCl<sub>3</sub>) δ: 7.64 (d, *J* = 7.7 Hz, 1H), 7.41 (td, *J* = 7.6, 1.3 Hz, 1H), 7.33-7.28 (m, 3H), 7.22-7.18 (m, 1H), 6.85 (t, *J* = 8.7 Hz, 1H), 4.42-4.36 (m, 4H), 3.24 (d, *J* = 14.8 Hz, 1H), 2.85 (d, *J* = 14.8 Hz, 1H), 2.23 (s, 3H), 1.37 (q, *J* = 6.7 Hz, 6H); <sup>13</sup>C NMR (100 MHz, CDCl<sub>3</sub>) δ: 181.8, 173.5, 169.7, 169.2, 164.7 (d, *J* = 251.6 Hz), 154.5, 141.7, 130.2 (d, *J* = 8.8 Hz), 129.1, 127.6 (d, *J* = 3.2 Hz), 126.7, 122.6, 120.7, 115.6 (d, *J* = 21.6 Hz), 85.7, 74.8, 62.7, 62.6, 40.2, 16.3, 14.0. **HRMS (ESI)** ([M+H]<sup>+</sup>) calculated for

C<sub>24</sub>H<sub>24</sub>N<sub>2</sub>O<sub>4</sub>: 423.1715, found: 423.1720.

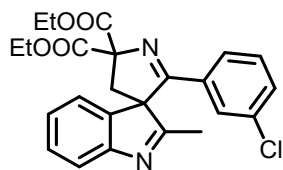

**diethyl 2'-(3-chlorophenyl)-2-methylspiro[indole-3,3'-pyrrole]-5',5'(4'H)-dicarboxylate (3k):**

Prepared from diethyl 2-isocyano-2-((2-methyl-1H-indol-3-yl)methyl)malonate (32.8 mg, 0.1 mmol, 1.0 equiv) and 1-chloro-3-iodobenzene (35.8 mg, 0.15 mmol, 1.5 equiv) according to the general procedure. The product **3k** was isolated as colorless oil (30.3 mg, 0.069 mmol, 69% yield). (new compound). **<sup>1</sup>H NMR** (400 MHz, CDCl<sub>3</sub>)  $\delta$ : 7.65-7.63 (m, 2H), 7.42 (td,  $J = 7.5, 1.2$  Hz, 1H), 7.31-7.26 (m, 3H), 7.21 (t,  $J = 7.4$  Hz, 1H), 7.04 (t,  $J = 8.0$  Hz, 1H), 6.81 (d,  $J = 7.9$  Hz, 1H), 4.45-4.36 (m, 4H), 3.24 (d,  $J = 14.8$  Hz, 1H), 2.86 (d,  $J = 14.8$  Hz, 1H), 2.23 (s, 3H), 1.38 (q,  $J = 6.8$  Hz, 6H); **<sup>13</sup>C NMR** (100 MHz, CDCl<sub>3</sub>)  $\delta$ : 181.4, 173.6, 169.5, 169.0, 154.6, 141.4, 134.7, 133.0, 131.7, 129.8, 129.3, 128.3, 126.8, 125.4, 122.6, 120.7, 85.9, 74.8, 62.8, 62.7, 40.1, 16.4, 14.1. **HRMS (ESI)** ( $[M+H]^+$ ) calculated for C<sub>24</sub>H<sub>24</sub>ClN<sub>2</sub>O<sub>4</sub>: 439.1419, found: 439.1418.

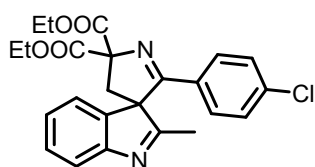

**diethyl 2'-(4-chlorophenyl)-2-methylspiro[indole-3,3'-pyrrole]-5',5'(4'H)-dicarboxylate (3l):**

Prepared from diethyl 2-isocyano-2-((2-methyl-1H-indol-3-yl)methyl)malonate (32.8 mg, 0.1 mmol, 1.0 equiv) and 1-chloro-4-iodobenzene (35.8 mg, 0.15 mmol, 1.5 equiv) according to the general procedure. The product **3l** was isolated as colorless oil (34.6 mg, 0.079 mmol, 79% yield). (new compound). **<sup>1</sup>H NMR** (400 MHz, CDCl<sub>3</sub>)  $\delta$ : 7.55 (d,  $J = 7.7$  Hz, 1H), 7.32 (td,  $J = 7.6, 1.0$  Hz, 1H), 7.20-7.15 (m, 3H), 7.14-7.09 (m, 1H), 7.07-7.04 (m, 2H), 4.36-4.27 (m, 4H), 3.15 (d,  $J = 14.7$  Hz, 1H), 2.77 (d,  $J = 14.7$  Hz, 1H), 2.14 (s, 3H), 1.29 (td,  $J = 7.1, 5.4$  Hz, 6H); **<sup>13</sup>C NMR** (100 MHz, CDCl<sub>3</sub>)  $\delta$ : 181.6, 173.6, 169.6, 169.1, 154.7, 141.6, 138.0, 129.9, 129.2, 129.2, 128.8, 126.7, 122.6, 120.7, 85.9, 74.9, 62.7, 62.6, 40.2, 16.3, 14.0. **HRMS (ESI)** ( $[M+H]^+$ )

calculated for C<sub>24</sub>H<sub>24</sub>ClN<sub>2</sub>O<sub>4</sub>: 439.1419, found: 439.1418.

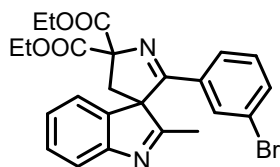

**diethyl 2'-(3-bromophenyl)-2-methylspiro[indole-3,3'-pyrrole]-5',5'(4'H)-dicarboxylate (3m):**

Prepared from diethyl 2-isocyano-2-((2-methyl-1H-indol-3-yl)methyl)malonate (32.8 mg, 0.1 mmol, 1.0 equiv) and 1-bromo-3-iodobenzene (42.4 mg, 0.15 mmol, 1.5 equiv) according to the general procedure. The product **3m** was isolated as colorless oil (39.6 mg, 0.082 mmol, 82% yield). (new compound). **<sup>1</sup>H NMR** (400 MHz, CDCl<sub>3</sub>)  $\delta$ : 7.83 (t,  $J$  = 1.8 Hz, 1H), 7.64 (d,  $J$  = 7.7 Hz, 1H), 7.46-7.40 (m, 2H), 7.28 (s, 1H), 7.23-7.19 (m, 1H), 6.97 (t,  $J$  = 7.9 Hz, 1H), 6.82 (d,  $J$  = 8.0 Hz, 1H), 4.45-4.36 (m, 4H), 3.26 (d,  $J$  = 14.7 Hz, 1H), 2.86 (d,  $J$  = 14.7 Hz, 1H), 2.23 (s, 3H), 1.38 (q,  $J$  = 6.8 Hz, 6H); **<sup>13</sup>C NMR** (100 MHz, CDCl<sub>3</sub>)  $\delta$ : 181.4, 173.5, 169.5, 169.0, 154.6, 141.4, 134.6, 133.2, 131.1, 130.0, 129.3, 126.7, 125.8, 122.8, 122.6, 120.7, 85.8, 74.8, 62.8, 62.7, 40.1, 16.4, 14.0. **HRMS (ESI)** ( $[M+H]^+$ ) calculated for C<sub>24</sub>H<sub>24</sub>BrN<sub>2</sub>O<sub>4</sub>: 483.0914, found: 483.0911.

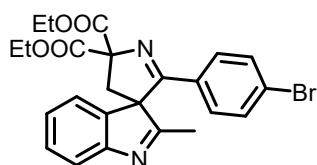

**diethyl 2'-(4-bromophenyl)-2-methylspiro[indole-3,3'-pyrrole]-5',5'(4'H)-dicarboxylate (3n):**

Prepared from diethyl 2-isocyano-2-((2-methyl-1H-indol-3-yl)methyl)malonate (32.8 mg, 0.1 mmol, 1.0 equiv) and 1-bromo-4-iodobenzene (42.4 mg, 0.15 mmol, 1.5 equiv) according to the general procedure. The product **3n** was isolated as colorless oil (39.2 mg, 0.081 mmol, 81% yield). (new compound). **<sup>1</sup>H NMR** (400 MHz, CDCl<sub>3</sub>)  $\delta$ : 7.62(d,  $J$  = 7.7 Hz, 1H), 7.40 (td,  $J$  = 7.6, 1.3 Hz, 1H), 7.31-7.28 (m, 2H), 7.26-7.25 (m, 1H), 7.21-7.19 (m, 1H), 7.17-7.15 (m, 2H), 4.43-4.35 (m, 4H), 3.23 (d,  $J$  = 14.8 Hz, 1H), 2.85 (d,  $J$  = 14.8 Hz, 1H), 2.22(s, 3H), 1.37 (td,  $J$  = 7.1, 5.5 Hz, 6H); **<sup>13</sup>C NMR** (100 MHz, CDCl<sub>3</sub>)  $\delta$ : 181.6, 173.8, 169.6, 169.1, 154.6, 141.6, 131.8, 130.3, 129.4, 129.2, 126.7, 126.6, 122.6, 120.7, 85.9, 74.8, 62.7, 62.7, 40.2, 16.3, 14.0.

**HRMS (ESI)** ( $[M+H]^+$ ) calculated for  $C_{24}H_{24}BrN_2O_4$ : 483.0914, found: 483.0916.

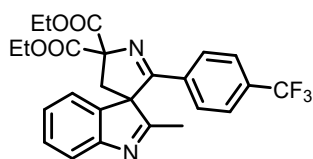

**diethyl 2-methyl-2'-(4-(trifluoromethyl)phenyl)spiro[indole-3,3'-pyrrole]-5',5'(4'H)-dicarboxylate (3o):**

Prepared from diethyl 2-isocyano-2-((2-methyl-1H-indol-3-yl)methyl)malonate (32.8 mg, 0.1 mmol, 1.0 equiv) and 1-iodo-4-(trifluoromethyl)benzene (40.8 mg, 0.15 mmol, 1.5 equiv) according to the general procedure. The product **3o** was isolated as colorless oil (43.9 mg, 0.093 mmol, 93% yield). (new compound).  $^1\text{H NMR}$  (400 MHz,  $\text{CDCl}_3$ )  $\delta$ : 7.65 (d,  $J = 7.8$  Hz, 1H), 7.45-7.40 (m, 5H), 7.29-2.27 (m, 1H), 7.23-7.20 (m, 1H), 4.45-4.37 (m, 4H), 3.26 (d,  $J = 14.8$  Hz, 1H), 2.89 (d,  $J = 14.8$  Hz, 1H), 2.23 (s, 3H), 1.38 (q,  $J = 6.6$  Hz, 6H);  $^{13}\text{C NMR}$  (100 MHz,  $\text{CDCl}_3$ )  $\delta$ : 181.3, 173.7, 169.4, 168.9, 154.6, 141.3, 134.6, 133.1 (q,  $J = 32.5$ ), 129.4, 128.2, 127.5, 126.8, 125.5 (q,  $J = 3.6$  Hz), 123.5 (q,  $J = 270.9$  Hz), 122.6, 120.8, 86.0, 74.9, 62.8, 62.8, 40.1, 16.4, 14.0. **HRMS (ESI)** ( $[M+H]^+$ ) calculated for  $C_{25}H_{24}F_3N_2O_4$ : 473.1683, found: 473.1675.

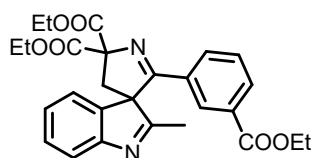

**diethyl 2'-(3-(ethoxycarbonyl)phenyl)-2-methylspiro[indole-3,3'-pyrrole]-5',5'(4'H)-dicarboxylate (3p):**

Prepared from diethyl 2-isocyano-2-((2-methyl-1H-indol-3-yl)methyl)malonate (32.8 mg, 0.1 mmol, 1.0 equiv) and ethyl 3-iodobenzoate (41.4 mg, 0.15 mmol, 1.5 equiv) according to the general procedure. The product **3p** was isolated as colorless oil (40.5 mg, 0.085 mmol, 85% yield). (new compound).  $^1\text{H NMR}$  (400 MHz,  $\text{CDCl}_3$ )  $\delta$ : 8.01 (d,  $J = 7.8$  Hz, 1H), 7.86 (s, 1H), 7.66 (d,  $J = 7.7$  Hz, 1H), 7.51-7.49 (m, 1H), 7.45-7.41 (m, 1H), 7.31-7.28 (m, 2H), 7.24-7.20 (m, 1H), 4.46-4.37 (m, 4H), 4.28 (q,  $J = 7.1$  Hz, 2H), 3.27 (d,  $J = 14.7$  Hz, 1H), 2.88 (d,  $J = 14.7$  Hz, 1H), 2.21 (s, 3H), 1.41-1.36 (m, 6H), 1.33 (t,  $J = 7.1$  Hz, 3H);  $^{13}\text{C NMR}$  (100 MHz,  $\text{CDCl}_3$ )  $\delta$ : 181.3, 174.2, 169.6, 169.1, 165.5, 154.8, 141.5, 132.5, 131.9, 131.7, 130.9, 129.2, 128.9, 128.7,

126.7, 122.6, 120.7, 86.0, 75.0, 62.7, 62.7, 61.1, 40.1, 16.3, 14.2, 14.0. **HRMS (ESI)** ( $[M+H]^+$ ) calculated for  $C_{27}H_{29}N_2O_6$ : 477.2020, found: 477.2019.

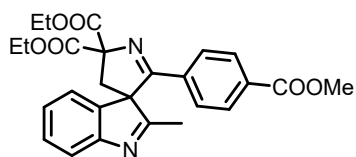

**diethyl 2'-(4-(methoxycarbonyl)phenyl)-2-methylspiro[indole-3,3'-pyrrole]-5',5'(4'H)-dicarboxylate (3q):**

Prepared from diethyl 2-isocyano-2-((2-methyl-1H-indol-3-yl)methyl)malonate (32.8 mg, 0.1 mmol, 1.0 equiv) and methyl 4-iodobenzoate (39.3 mg, 0.15 mmol, 1.5 equiv) according to the general procedure. The product **3q** was isolated as white solid (38.8 mg, 0.084 mmol, 84% yield): mp 86–87 °C. (new compound). **<sup>1</sup>H NMR** (400 MHz,  $CDCl_3$ )  $\delta$ : 7.74 (d,  $J = 8.6$  Hz, 2H), 7.55 (d,  $J = 7.7$  Hz, 1H), 7.33 (td,  $J = 7.6$ , 1.2 Hz, 1H), 7.29-7.26 (m, 2H), 7.19 (d,  $J = 7.4$  Hz, 1H), 7.12 (td,  $J = 7.4$ , 0.7 Hz, 1H), 4.37-4.20 (m, 4H), 3.78 (s, 3H), 3.17 (d,  $J = 14.7$  Hz, 1H), 2.80 (d,  $J = 14.7$  Hz, 1H), 2.15 (s, 3H), 1.33-1.28 (m, 6H); **<sup>13</sup>C NMR** (100 MHz,  $CDCl_3$ )  $\delta$ : 181.3, 174.2, 169.5, 169.0, 166.1, 154.8, 141.5, 135.4, 132.7, 129.6, 129.3, 127.8, 126.7, 122.6, 120.7, 86.1, 75.0, 62.8, 62.7, 52.2, 40.1, 16.3, 14.0. **HRMS (ESI)** ( $[M+H]^+$ ) calculated for  $C_{26}H_{27}N_2O_6$ : 463.1864, found: 463.1857.

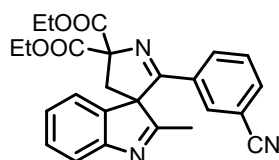

**diethyl 2'-(3-cyanophenyl)-2-methylspiro[indole-3,3'-pyrrole]-5',5'(4'H)-dicarboxylate (3r):**

Prepared from diethyl 2-isocyano-2-((2-methyl-1H-indol-3-yl)methyl)malonate (32.8 mg, 0.1 mmol, 1.0 equiv) and 3-iodobenzonitrile (34.4 mg, 0.15 mmol, 1.5 equiv) according to the general procedure. The product **3r** was isolated as colorless oil (40.8 mg, 0.095 mmol, 95% yield). (new compound). **<sup>1</sup>H NMR** (400 MHz,  $CDCl_3$ )  $\delta$ : 7.87 (s, 1H), 7.66 (d,  $J = 7.7$  Hz, 1H), 7.60 (d,  $J = 7.4$  Hz, 1H), 7.44 (d,  $J = 7.5$ , 1.3 Hz, 1H), 7.27-7.20 (m, 4H), 4.46-4.34 (m, 4H), 3.27 (d,  $J = 14.8$  Hz, 1H), 2.98 (d,  $J = 14.8$  Hz, 1H), 2.23 (s, 3H), 1.39 (q,  $J = 7.0$  Hz, 6H); **<sup>13</sup>C NMR** (100 MHz,  $CDCl_3$ )  $\delta$ : 180.9, 173.0, 169.3, 168.8, 154.6, 140.9, 134.6, 132.5, 131.8, 131.4, 129.5, 129.5,

126.9, 122.6, 120.9, 117.7, 113.1, 85.9, 74.7, 72.9, 62.8, 40.0, 16.4, 14.0. **HRMS (ESI)** ( $[M+H]^+$ ) calculated for  $C_{25}H_{24}N_3O_4$ : 430.1761, found: 430.1763.

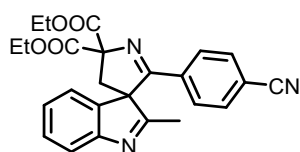

**diethyl 2'-(4-cyanophenyl)-2-methylspiro[indole-3,3'-pyrrole]-5',5'(4'H)-dicarboxylate (3s):**

Prepared from diethyl 2-isocyano-2-((2-methyl-1H-indol-3-yl)methyl)malonate (32.8 mg, 0.1 mmol, 1.0 equiv) and 4-iodobenzonitrile (34.4 mg, 0.15 mmol, 1.5 equiv) according to the general procedure. The product **3s** was isolated as colorless oil (37.8 mg, 0.088 mmol, 88% yield). (new compound). **<sup>1</sup>H NMR** (400 MHz,  $CDCl_3$ )  $\delta$ : 7.64 (d,  $J = 7.8$  Hz, 1H), 7.47-7.38 (m, 5H), 7.27-7.25 (m, 1H), 7.23-7.19 (m, 1H), 4.45-4.36 (m, 4H), 3.26 (d,  $J = 14.8$  Hz, 1H), 2.89 (d,  $J = 14.8$  Hz, 1H), 2.22 (s, 3H), 1.38 (td,  $J = 7.1, 5.6$  Hz, 6H); **<sup>13</sup>C NMR** (100 MHz,  $CDCl_3$ )  $\delta$ : 181.0, 173.4, 169.3, 168.8, 154.7, 141.1, 135.4, 132.2, 129.5, 126.9, 122.6, 120.9, 117.9, 115.0, 86.1, 74.9, 62.8, 62.8, 40.1, 16.3, 14.0. **HRMS (ESI)** ( $[M+H]^+$ ) calculated for  $C_{25}H_{24}N_3O_4$ : 430.1761, found: 430.1769.

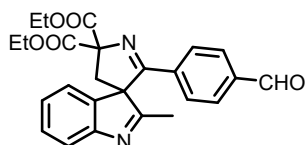

**diethyl 2'-(4-formylphenyl)-2-methylspiro[indole-3,3'-pyrrole]-5',5'(4'H)-dicarboxylate (3t):**

Prepared from diethyl 2-isocyano-2-((2-methyl-1H-indol-3-yl)methyl)malonate (32.8 mg, 0.1 mmol, 1.0 equiv) and 4-iodobenzaldehyde (34.8 mg, 0.15 mmol, 1.5 equiv) according to the general procedure. The product **3t** was isolated as colorless oil (34.6 mg, 0.080 mmol, 80% yield). (new compound). **<sup>1</sup>H NMR** (400 MHz,  $CDCl_3$ )  $\delta$ : 9.23 (s, 1H), 7.69-7.64 (m, 3H), 7.46-7.40 (m, 3H), 7.29-7.27 (m, 1H), 7.21 (t,  $J = 7.4$  Hz, 1H), 4.44-4.37 (m, 4H), 3.26 (d,  $J = 14.8$  Hz, 1H), 2.89 (d,  $J = 14.8$  Hz, 1H), 2.24 (s, 3H), 1.38 (q,  $J = 6.6$  Hz, 6H); **<sup>13</sup>C NMR** (100 MHz,  $CDCl_3$ )  $\delta$ : 191.4, 181.2, 174.0, 169.4, 168.9, 154.7, 141.3, 138.0, 136.6, 129.6, 129.4, 128.5, 126.8, 122.6, 120.8, 86.1, 75.0, 62.8, 62.8, 40.1, 16.4, 14.0. **HRMS (ESI)** ( $[M+H]^+$ ) calculated for

C<sub>25</sub>H<sub>25</sub>N<sub>2</sub>O<sub>5</sub>: 433.1758, found: 433.1756.

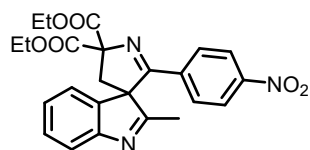

**diethyl 2-methyl-2'-(4-nitrophenyl)spiro[indole-3,3'-pyrrole]-5',5'-(4'H)-dicarboxylate (3u):**

Prepared from diethyl 2-isocyano-2-((2-methyl-1H-indol-3-yl)methyl)malonate (32.8 mg, 0.1 mmol, 1.0 equiv) and 1-iodo-4-nitrobenzene (37.4 mg, 0.15 mmol, 1.5 equiv) according to the general procedure. The product **3u** was isolated as colorless oil (38.7 mg, 0.086 mmol, 86% yield). (new compound). <sup>1</sup>H NMR (400 MHz, CDCl<sub>3</sub>) δ: 8.01 (d, *J* = 8.9 Hz, 2H), 7.65 (d, *J* = 7.7 Hz, 1H), 7.47-7.41 (m, 3H), 7.28-7.26 (m, 1H), 7.22 (t, *J* = 7.4 Hz, 1H), 4.47-4.37 (m, 4H), 3.27 (d, *J* = 14.8 Hz, 1H), 2.91 (d, *J* = 14.8 Hz, 1H), 2.23 (s, 3H), 1.39 (q, *J* = 6.5 Hz, 6H); <sup>13</sup>C NMR (100 MHz, CDCl<sub>3</sub>) δ: 180.8, 173.2, 169.2, 168.8, 154.7, 149.5, 141.0, 137.0, 129.6, 128.9, 126.9, 123.6, 122.6, 120.9, 86.2, 75.0, 62.9, 62.8, 40.1, 16.4, 14.0. HRMS (ESI) ([M+H]<sup>+</sup>) calculated for C<sub>24</sub>H<sub>24</sub>N<sub>3</sub>O<sub>6</sub>: 450.1660, found: 450.1653.

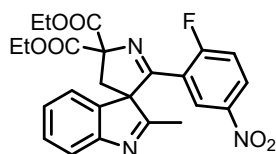

**diethyl 2'-(2-fluoro-5-nitrophenyl)-2-methylspiro[indole-3,3'-pyrrole]-5',5'-(4'H)-dicarboxylate (3v):**

Prepared from diethyl 2-isocyano-2-((2-methyl-1H-indol-3-yl)methyl)malonate (32.8 mg, 0.1 mmol, 1.0 equiv) and 1-fluoro-2-iodo-4-nitrobenzene (40.1 mg, 0.15 mmol, 1.5 equiv) according to the general procedure. The product **3v** was isolated as colorless oil (41.1 mg, 0.088 mmol, 88% yield). (new compound). <sup>1</sup>H NMR (400 MHz, CDCl<sub>3</sub>) δ: 8.17-8.13 (m, 1H), 7.54-7.51 (m, 2H), 7.45-7.40 (m, 2H), 7.32-7.28 (m, 1H), 7.14 (t, *J* = 9.0 Hz, 1H), 4.47-4.39 (m, 4H), 3.31 (d, *J* = 14.9 Hz, 1H), 3.03 (d, *J* = 14.9 Hz, 1H), 2.30 (s, 3H), 1.40 (td, *J* = 7.1, 0.8 Hz, 6H); <sup>13</sup>C NMR (100 MHz, CDCl<sub>3</sub>) δ: 178.8, 170.7 (d, *J* = 3.3 Hz), 168.9, 161.9, 163.2 (d, *J* = 263.3 Hz), 155.3, 143.5, 139.1, 129.87, 127.5 (d, *J* = 10.4 Hz), 126.8, 125.3 (d, *J* = 4.1 Hz), 122.6, 121.2 (d, *J* = 15.7 Hz), 120.7, 117.4 (d, *J* = 24.6 Hz), 87.4, 77.0, 63.0, 63.0,

38.4, 16.4, 16.3, 14.0, 14.0. **HRMS (ESI)** ( $[M+H]^+$ ) calculated for  $C_{24}H_{23}FN_3O_6$ : 468.1565, found: 468.1568.

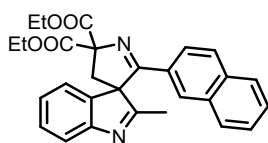

**diethyl 2-methyl-2'-(naphthalen-2-yl)spiro[indole-3,3'-pyrrole]-5',5'-(4'H)-dicarboxylate (3w):**

Prepared from diethyl 2-isocyano-2-((2-methyl-1H-indol-3-yl)methyl)malonate (32.8 mg, 0.1 mmol, 1.0 equiv) and 2-iodonaphthalene (38.1 mg, 0.15 mmol, 1.5 equiv) according to the general procedure. The product **3w** was isolated as colorless oil (19.5 mg, 0.043 mmol, 43% yield). (new compound).  **$^1H$ NMR** (400 MHz,  $CDCl_3$ )  $\delta$ : 7.73-7.62 (m, 4H), 7.57 (d,  $J = 7.0$  Hz, 1H), 7.48-7.37 (m, 3H), 7.30 (d,  $J = 7.0$  Hz, 1H), 7.19 (td,  $J = 7.5, 0.8$  Hz, 1H), 4.47-4.38 (m, 4H), 3.29 (d,  $J = 14.7$  Hz, 1H), 2.90 (d,  $J = 14.7$  Hz, 1H), 2.26 (s, 3H), 1.39 (q,  $J = 7.4$  Hz, 6H);  **$^{13}C$  NMR** (100 MHz,  $CDCl_3$ )  $\delta$ : 182.2, 174.5, 169.8, 169.4, 154.7, 142.2, 134.7, 132.5, 129.1, 129.1, 128.9, 128.6, 128.2, 127.7, 127.4, 126.7, 126.4, 124.7, 122.7, 120.6, 86.0, 75.0, 62.7, 62.7, 40.3, 16.4, 14.1. **HRMS (ESI)** ( $[M+H]^+$ ) calculated for  $C_{28}H_{27}N_2O_4$ : 455.1965, found: 455.1963.

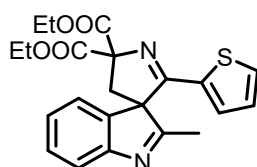

**diethyl 2-methyl-2'-(thiophen-2-yl)spiro[indole-3,3'-pyrrole]-5',5'-(4'H)-dicarboxylate (3x):**

Prepared from diethyl 2-isocyano-2-((2-methyl-1H-indol-3-yl)methyl)malonate (32.8 mg, 0.1 mmol, 1.0 equiv) and 2-iodothiophene (31.5 mg, 0.15 mmol, 1.5 equiv) according to the general procedure. The product **3x** was isolated as colorless oil (30.4 mg, 0.074 mmol, 74% yield). (new compound).  **$^1H$ NMR** (400 MHz,  $CDCl_3$ )  $\delta$ : 7.63 (d,  $J = 7.7$  Hz, 1H), 7.43-7.39 (m, 1H), 7.35 (d,  $J = 5.0$  Hz, 1H), 7.31 (d,  $J = 7.2$  Hz, 1H), 7.20 (t,  $J = 7.5$  Hz, 1H), 6.77 (t,  $J = 4.4$  Hz, 1H), 6.53 (d,  $J = 5.8$  Hz, 1H), 4.43-4.35 (m, 4H), 3.25 (d,  $J = 14.8$  Hz, 1H), 2.90 (d,  $J = 14.8$  Hz, 1H), 2.26 (s, 3H), 1.37 (td,  $J = 7.1, 2.7$  Hz, 6H);  **$^{13}C$  NMR** (100 MHz,  $CDCl_3$ )  $\delta$ : 181.8, 169.6, 169.2, 168.7,



154.8, 141.6, 134.5, 131.1, 129.9, 129.2, 127.9, 126.6, 122.8, 120.4, 86.1, 74.8, 62.6, 62.6, 40.1, 16.2, 14.0, 14.0. **HRMS (ESI)** ( $[M+H]^+$ ) calculated for  $C_{22}H_{23}N_2O_4S$ : 411.1373, found: 411.1375.

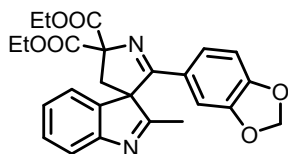

**diethyl 2'-(benzo[d][1,3]dioxol-5-yl)-2-methylspiro[indole-3,3'-pyrrole]-5',5'(4'H)-dicarboxylate (3y):**

Prepared from diethyl 2-isocyano-2-((2-methyl-1H-indol-3-yl)methyl)malonate (32.8 mg, 0.1 mmol, 1.0 equiv) and 5-iodobenzo[d][1,3]dioxole (37.2 mg, 0.15 mmol, 1.5 equiv) according to the general procedure. The product **3y** was isolated as colorless oil (34.1 mg, 0.076 mmol, 76% yield). (new compound). **<sup>1</sup>H NMR** (400 MHz,  $CDCl_3$ )  $\delta$ : 7.62 (d,  $J = 7.7$  Hz, 1H), 7.40 (td,  $J = 7.6, 1.2$  Hz, 1H), 7.27 (d,  $J = 8.3$  Hz, 1H), 7.19 (t,  $J = 7.4$  Hz, 1H), 7.07 (d,  $J = 1.7$  Hz, 1H), 6.59 (dd,  $J = 8.2, 1.8$  Hz, 1H), 6.51 (d,  $J = 8.2$  Hz, 1H), 5.90 (s, 2H), 4.44-4.34 (m, 4H), 3.22 (d,  $J = 14.7$  Hz, 1H), 2.80 (d,  $J = 14.7$  Hz, 1H), 2.23 (s, 3H), 1.37 (q,  $J = 6.8$  Hz, 6H); **<sup>13</sup>C NMR** (100 MHz,  $CDCl_3$ )  $\delta$ : 182.2, 173.5, 169.9, 169.4, 154.5, 150.5, 147.9, 142.2, 129.0, 126.6, 125.6, 122.9, 122.6, 120.6, 108.2, 108.0, 101.4, 85.5, 74.7, 62.6, 62.5, 40.4, 16.3, 14.0. **HRMS (ESI)** ( $[M+H]^+$ ) calculated for  $C_{25}H_{25}N_2O_6$ : 449.1707, found: 449.1711.

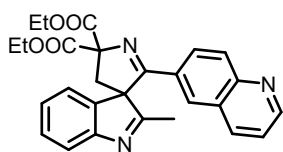

**diethyl 2-methyl-2'-(quinolin-6-yl)spiro[indole-3,3'-pyrrole]-5',5'(4'H)-dicarboxylate (3z):**

Prepared from diethyl 2-isocyano-2-((2-methyl-1H-indol-3-yl)methyl)malonate (32.8 mg, 0.1 mmol, 1.0 equiv) and 7-iodoquinoline (38.3 mg, 0.15 mmol, 1.5 equiv) according to the general procedure. The product **3z** was isolated as colorless oil (34.6 mg, 0.076 mmol, 76% yield). (new compound). **<sup>1</sup>H NMR** (400 MHz,  $CDCl_3$ )  $\delta$ : 8.88-8.87 (m, 1H), 7.95-7.86 (m, 3H), 7.70 (d,  $J = 7.7$  Hz, 1H), 7.55 (d,  $J = 1.7$  Hz, 1H), 7.44 (t,  $J = 7.6$  Hz, 1H), 7.34-7.31 (m, 2H), 7.21 (t,  $J = 7.4$  Hz, 1H), 4.48-4.39 (m, 4H), 3.30 (d,  $J = 14.7$  Hz, 1H), 2.92 (d,  $J = 14.7$  Hz, 1H), 2.26 (s, 3H), 1.40 (q,  $J = 7.2$

Hz, 6H);  $^{13}\text{C}$  NMR (100 MHz,  $\text{CDCl}_3$ )  $\delta$ : 181.8, 174.0, 169.6, 169.1, 154.7, 151.8, 149.3, 141.8, 137.1, 129.8, 129.6, 129.3, 128.5, 128.3, 127.5, 126.8, 122.7, 120.7, 86.0, 75.0, 62.8, 62.7, 40.2, 16.4, 14.1. **HRMS (ESI)** ( $[\text{M}+\text{H}]^+$ ) calculated for  $\text{C}_{27}\text{H}_{26}\text{N}_3\text{O}_4$ : 456.1918, found: 456.1913.

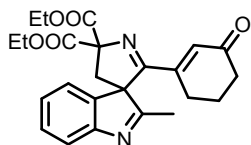

**diethyl 2-methyl-2'-(3-oxocyclohex-1-en-1-yl)spiro[indole-3,3'-pyrrole]-5',5'(4'H)-dicarboxylate (3aa):**

Prepared from diethyl 2-isocyano-2-((2-methyl-1H-indol-3-yl)methyl)malonate (32.8 mg, 0.1 mmol, 1.0 equiv) and 3-iodocyclohex-2-en-1-one (33.3 mg, 0.15 mmol, 1.5 equiv) according to the general procedure. The product **3aa** was isolated as colorless oil (37.6 mg, 0.089 mmol, 89% yield). (new compound).  $^1\text{H}$ NMR (400 MHz,  $\text{CDCl}_3$ )  $\delta$ : 7.59 (d,  $J = 7.7$  Hz, 1H), 7.41-7.36 (m, 1H), 7.20 (d,  $J = 3.9$  Hz, 2H), 5.36 (s, 1H), 4.43-4.33 (m, 4H), 3.25 (d,  $J = 11.0$  Hz, 1H), 2.77 (d,  $J = 11.0$  Hz, 1H), 2.65-2.62 (m, 2H), 2.31-2.27 (m, 2H), 2.25 (s, 3H), 1.96-1.89 (m, 2H), 1.38-1.33 (m, 6H);  $^{13}\text{C}$  NMR (100 MHz,  $\text{CDCl}_3$ )  $\delta$ : 199.4, 180.5, 175.2, 169.1, 168.6, 154.4, 150.5, 141.2, 130.3, 129.4, 126.7, 122.1, 121.0, 86.1, 74.5, 62.9, 62.8, 40.0, 37.5, 26.6, 21.9, 16.3, 14.0. **HRMS (ESI)** ( $[\text{M}+\text{H}]^+$ ) calculated for  $\text{C}_{24}\text{H}_{27}\text{N}_2\text{O}_5$ : 423.1914, found: 423.1911.

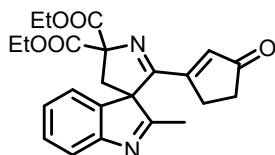

**diethyl 2-methyl-2'-(3-oxocyclopent-1-en-1-yl)spiro[indole-3,3'-pyrrole]-5',5'(4'H)-dicarboxylate (3ab):**

Prepared from diethyl 2-isocyano-2-((2-methyl-1H-indol-3-yl)methyl)malonate (32.8 mg, 0.1 mmol, 1.0 equiv) and 3-iodocyclopent-2-en-1-one (31.2 mg, 0.15 mmol, 1.5 equiv) according to the general procedure. The product **3ab** was isolated as colorless oil (31.5 mg, 0.077 mmol, 77% yield). (new compound).  $^1\text{H}$ NMR (400 MHz,  $\text{CDCl}_3$ )  $\delta$ : 7.59 (d,  $J = 7.7$  Hz, 1H), 7.42-7.38 (m, 1H), 7.23-7.19 (m, 2H), 5.51 (t,  $J = 1.84$  Hz, 1H), 4.45-4.35 (m, 4H), 3.20 (d,  $J = 14.9$  Hz, 1H), 3.02-2.92 (m, 2H), 2.86 (d,  $J = 14.9$  Hz, 1H), 2.36-2.33 (m, 2H), 2.24 (s, 3H), 1.37 (td,  $J = 7.1, 1.6$  Hz, 6H);  $^{13}\text{C}$  NMR (100 MHz,  $\text{CDCl}_3$ )  $\delta$ : 209.4, 180.3, 172.2, 169.0, 168.5, 154.7, 140.8, 134.8,

129.6, 126.8, 122.4, 120.9, 86.9, 74.9, 63.0, 62.9, 39.4, 34.4, 28.9, 16.2, 14.0. **HRMS (ESI)** ( $[M+H]^+$ ) calculated for  $C_{23}H_{25}N_2O_5$ : 409.1758, found: 409.1752.

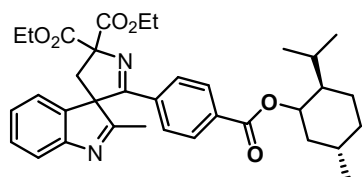

**diethyl 2'-((2R,5S)-2-isopropyl-5-methylcyclohexyl)oxy carbonyl phenyl-2-methylspiro[indole-3,3'-pyrrole]-5',5'-(4'H)-dicarboxylate (3ac):**

Prepared from diethyl 2-isocyano-2-((2-methyl-1H-indol-3-yl)methyl)malonate (32.8 mg, 0.1 mmol, 1.0 equiv) and (2R,5S)-2-isopropyl-5-methylcyclohexyl 4-iodobenzoate (57.9 mg, 0.15 mmol, 1.5 equiv) according to the general procedure. The product **3ac** was isolated as colorless oil (45.8 mg, 0.078 mmol, 78% yield). (new compound).  $^1\text{H NMR}$  (400 MHz,  $\text{CDCl}_3$ )  $\delta$ : 7.83 (d,  $J = 8.6$  Hz, 2H), 7.64 (d,  $J = 7.7$  Hz, 1H), 7.44-7.39 (m, 1H), 7.38-7.34 (m, 2H), 7.29-7.27 (m, 1H), 7.23-7.18 (m, 1H), 4.91-4.83 (m, 1H), 4.46-4.37 (m, 4H), 3.25 (dd,  $J = 14.7, 5.0$  Hz, 1H), 2.87 (dd,  $J = 14.7, 6.6$  Hz, 1H), 2.22 (d,  $J = 6.6$  Hz, 3H), 2.04 (d,  $J = 12.0$  Hz, 1H), 1.88-1.83 (m, 1H), 1.70 (d,  $J = 11.4$  Hz, 2H), 1.53-1.45 (m, 2H), 1.38 (td,  $J = 13.3, 6.8$  Hz, 6H), 1.10-1.00 (m, 2H), 0.91-0.86 (m, 7H), 0.73 (dd,  $J = 6.9, 2.6$  Hz, 3H);  $^{13}\text{C NMR}$  (100 MHz,  $\text{CDCl}_3$ )  $\delta$ : 181.5, 181.4, 174.2, 174.1, 169.5, 169.5, 169.1, 169.0, 165.1, 154.7, 141.6, 141.6, 135.1, 133.4, 133.4, 129.6, 129.2, 127.8, 126.7, 122.6, 120.7, 86.0, 75.1, 75.0, 62.8, 62.7, 47.1, 47.1, 40.8, 40.1, 34.2, 31.4, 26.4, 26.3, 23.5, 23.4, 22.0, 20.7, 20.7, 16.4, 16.4, 16.3, 14.1. **HRMS (APCI)** ( $[M+H]^+$ ) calculated for  $C_{35}H_{43}N_2O_6$ : 587.3116, found: 587.3111.

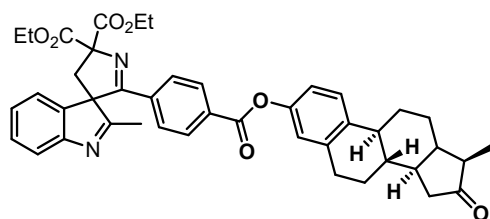

**diethyl 2'-((8S,9S,14S,17R)-17-methyl-16-oxo-7,8,9,11,12,13,14,15,16,17-decahydro-6H-cyclopenta[a]phenanthren-3-yl)oxy carbonyl phenylspiro[indole-3,3'-pyrrole]-5',5'-(4'H)-dicarboxylate (3ad):**

Prepared from diethyl 2-isocyano-2-((2-methyl-1H-indol-3-yl)methyl)malonate (32.8 mg, 0.1 mmol, 1.0 equiv) and (8S,9S,14S,17R)-17-methyl-16-oxo-

7,8,9,11,12,13,14,15,16,17-decahydro-6H-cyclopenta[a]phenanthren-3-yl 4-iodobenzoate (75.0 mg, 0.15 mmol, 1.5 equiv) according to the general procedure. The product **3ad** was isolated as colorless oil (52.6 mg, 0.075 mmol, 75% yield). (new compound). <sup>1</sup>H NMR (400 MHz, CDCl<sub>3</sub>) δ: 7.98 (d, *J* = 8.6 Hz), 7.64 (d, *J* = 7.7 Hz, 1H), 7.43-7.41 (m, 3H), 7.32-7.27 (m, 2H), 7.21 (t, *J* = 7.4 Hz, 1H), 6.92-6.87 (m, 2H), 4.47-4.37 (m, 4H), 3.27 (d, *J* = 14.7 Hz, 1H), 3.92-2.88 (m, 3H), 2.51 (dd, *J* = 19.1, 8.8 Hz, 1H), 2.43-2.39 (m, 1H), 2.32-2.28 (m, 1H), 2.25 (s, 3H), 2.19-2.15 (m, 1H), 2.10-1.95 (m, 3H), 1.66-1.60 (m, 2H), 1.57-1.45 (m, 4H), 1.39 (td, 13.2, 7.1 Hz, 6H), 0.91 (s, 3H); <sup>13</sup>C NMR (100 MHz, CDCl<sub>3</sub>) δ: 181.2, 174.12, 169.4, 169.0, 164.5, 154.7, 148.5, 141.4, 138.0, 137.5, 135.9, 132.1, 130.2, 129.3, 128.0, 126.7, 126.4, 122.6, 121.4, 120.7, 118.6, 86.1, 75.0, 62.8, 62.7, 50.3, 47.9, 44.1, 40.0, 37.9, 35.8, 31.5, 29.3, 26.2, 25.7, 21.5, 16.4, 14.0, 13.8. HRMS (APCI) ([M+H]<sup>+</sup>) calculated for C<sub>43</sub>H<sub>45</sub>N<sub>2</sub>O<sub>7</sub>: 701.3221, found: 701.3223.

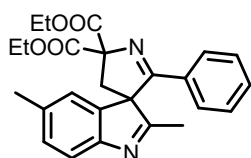

**diethyl 2,5-dimethyl-2'-phenylspiro[indole-3,3'-pyrrole]-5',5'(4'H)-dicarboxylate (3ae):**

Prepared from diethyl 2-((2,5-dimethyl-1H-indol-3-yl)methyl)-2-isocyanomalonate (34.2 mg, 0.1 mmol, 1.0 equiv) and iodobenzene (30.6 mg, 0.15 mmol, 1.5 equiv) according to the general procedure. The product **3ae** was isolated as colorless oil (38.1 mg, 0.091 mmol, 91% yield). (new compound). <sup>1</sup>H NMR (400 MHz, CDCl<sub>3</sub>) δ: 7.50 (d, *J* = 7.8 Hz, 1H), 7.34-7.31 (m, 3H), 7.20-7.15 (m, 3H), 7.06 (s, 1H), 4.44-4.35 (m, 4H), 3.23 (d, *J* = 14.7 Hz, 1H), 2.83 (d, *J* = 14.7 Hz, 1H), 2.32 (s, 3H), 2.20 (s, 3H), 1.38 (t, *J* = 7.1 Hz, 6H); <sup>13</sup>C NMR (100 MHz, CDCl<sub>3</sub>) δ: 180.9, 174.8, 169.8, 169.3, 152.4, 142.1, 136.6, 131.6, 131.5, 129.6, 128.5, 127.9, 123.3, 120.1, 85.8, 74.8, 62.7, 62.6, 40.4, 21.4, 16.3, 14.1, 14.1. HRMS (ESI) ([M+H]<sup>+</sup>) calculated for C<sub>25</sub>H<sub>27</sub>N<sub>2</sub>O<sub>4</sub>: 419.1965, found: 419.1960.

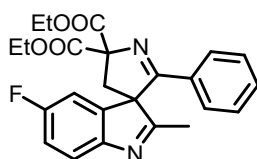

**diethyl 5-fluoro-2-methyl-2'-phenylspiro[indole-3,3'-pyrrole]-5',5'(4'H)-dicarboxylate (3af):**

Prepared from diethyl 2-((5-fluoro-2-methyl-1H-indol-3-yl)methyl)-2-isocyanomalonate (34.6 mg, 0.1 mmol, 1.0 equiv) and iodobenzene (30.6 mg, 0.15 mmol, 1.5 equiv) according to the general procedure. The product **3af** was isolated as colorless oil (35.5 mg, 0.084 mmol, 84% yield). (new compound). <sup>1</sup>H NMR (400 MHz, CDCl<sub>3</sub>) δ: 7.56 (dd, *J* = 8.5, 4.6 Hz, 1H), 7.36-7.31 (m, 3H), 7.19 (t, *J* = 7.5 Hz, 2H), 7.08 (td, *J* = 8.9, 2.6 Hz, 1H), 7.02 (dd, *J* = 7.8, 2.5 Hz, 1H), 4.44-4.35 (m, 4H), 3.23 (d, *J* = 14.8 Hz, 1H), 2.82 (d, *J* = 14.8 Hz, 1H), 2.21 (s, 3H), 1.38 (td, *J* = 7.1, 2.3 Hz, 6H); <sup>13</sup>C NMR (100 MHz, CDCl<sub>3</sub>) δ: 181.8 (d, *J* = 3.6 Hz), 174.0, 169.6, 169.1, 161.6 (d, *J* = 244.7 Hz), 150.7 (d, *J* = 2.4 Hz), 143.7 (d, *J* = 9.1 Hz), 131.8, 131.3, 128.6, 127.8, 121.3 (d, *J* = 8.7 Hz), 115.7 (d, *J* = 23.7 Hz), 110.6 (d, *J* = 25.2 Hz), 85.9, 62.7, 62.7, 40.2, 16.3, 14.0. **HRMS (ESI)** ([M+H]<sup>+</sup>) calculated for C<sub>24</sub>H<sub>24</sub>FN<sub>2</sub>O<sub>4</sub>: 423.1715, found: 423.1712.

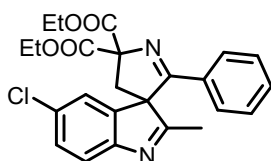

**diethyl 5-chloro-2-methyl-2'-phenylspiro[indole-3,3'-pyrrole]-5',5'(4'H)-dicarboxylate (3ag):**

Prepared from diethyl 2-((5-chloro-2-methyl-1H-indol-3-yl)methyl)-2-isocyanomalonate (36.3 mg, 0.1 mmol, 1.0 equiv) and iodobenzene (30.6 mg, 0.15 mmol, 1.5 equiv) according to the general procedure. The product **3ag** was isolated as colorless oil (37.7 mg, 0.086 mmol, 86% yield). (new compound). <sup>1</sup>H NMR (400 MHz, CDCl<sub>3</sub>) δ: 7.55 (d, *J* = 8.2 Hz, 1H), 7.38-7.30 (m, 4H), 7.26 (d, *J* = 2.0 Hz, 1H), 7.19 (t, *J* = 7.7 Hz, 2H), 4.45-4.35 (m, 4H), 3.24 (d, *J* = 14.8 Hz, 1H), 2.82 (d, *J* = 14.8 Hz, 1H), 2.22 (s, 3H), 1.38 (td, *J* = 7.1, 2.4 Hz, 6H); <sup>13</sup>C NMR (100 MHz, CDCl<sub>3</sub>) δ: 182.5, 173.8, 169.6, 169.1, 153.2, 143.6, 132.3, 131.8, 131.2, 129.2, 128.6, 127.8, 123.2, 121.4, 85.9, 75.1, 62.8, 62.7, 40.2, 16.4, 14.0. **HRMS (ESI)** ([M+H]<sup>+</sup>) calculated for C<sub>24</sub>H<sub>24</sub>ClN<sub>2</sub>O<sub>4</sub>: 439.1419, found: 439.1417.

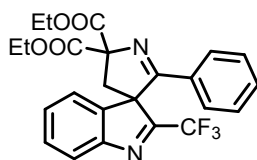

**diethyl 2'-phenyl-2-(trifluoromethyl)spiro[indole-3,3'-pyrrole]-5',5'(4'H)-dicarboxylate (3ah):**

Prepared from diethyl 2-isocyano-2-((2-(trifluoromethyl)-1H-indol-3-yl)methyl)malonate (38.2 mg, 0.1 mmol, 1.0 equiv) and iodobenzene (30.6 mg, 0.15 mmol, 1.5 equiv) according to the general procedure. The product **3ah** was isolated as colorless oil (43.1 mg, 0.094 mmol, 94% yield). (new compound). <sup>1</sup>H NMR (400 MHz, CDCl<sub>3</sub>) δ: 7.87 (d, *J* = 7.8 Hz, 1H), 7.55-7.51 (m, 1H), 7.47-7.40 (m, 2H), 7.34-7.30 (m, 1H), 7.18-7.13 (m, 4H), 4.44-4.35 (m, 4H), 3.55 (d, *J* = 14.9 Hz, 1H), 3.01 (d, *J* = 14.9 Hz, 1H), 1.37 (t, *J* = 7.1 Hz, 6H); <sup>13</sup>C NMR (100 MHz, CDCl<sub>3</sub>) δ: 172.1, 169.5, 168.6, 168.5 (q, *J* = 34.8 Hz), 151.6, 141.6, 131.8, 131.4, 130.0, 129.8, 128.5, 127.5, 123.5, 123.0, 119.9 (q, *J* = 274.0 Hz), 86.4, 72.9, 62.9, 62.7, 38.5, 14.0, 13.9. **HRMS (ESI)** ([M+H]<sup>+</sup>) calculated for C<sub>24</sub>H<sub>22</sub>F<sub>3</sub>N<sub>2</sub>O<sub>4</sub>: 459.1526, found: 459.1525.

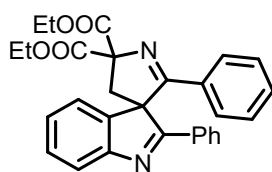

**diethyl 2,2'-diphenylspiro[indole-3,3'-pyrrole]-5',5'(4'H)-dicarboxylate (3ai):**

Prepared from diethyl 2-isocyano-2-((2-phenyl-1H-indol-3-yl)methyl)malonate (39.0 mg, 0.1 mmol, 1.0 equiv) and iodobenzene (30.6 mg, 0.15 mmol, 1.5 equiv) according to the general procedure. The product **3ai** was isolated as white solid (45.3mg, 0.097 mmol, 97% yield): mp 95–97 °C. (new compound). <sup>1</sup>H NMR (400 MHz, CDCl<sub>3</sub>) δ: 7.94 (d, *J* = 6.7 Hz, 2H), 7.78 (d, *J* = 7.7 Hz, 1H), 7.44-7.36 (m, 6H), 7.29 (d, *J* = 7.3 Hz, 1H), 7.24-7.18 (m, 2H), 7.11 (t, *J* = 7.8 Hz, 2H), 4.44-4.30 (m, 4H), 3.28 (d, *J* = 14.4 Hz, 1H), 2.96 (d, *J* = 14.4 Hz, 1H), 1.38-1.31 (m, 6H); <sup>13</sup>C NMR (100 MHz, CDCl<sub>3</sub>) δ: 178.1, 176.1, 169.7, 169.1, 153.9, 142.2, 131.7, 131.6, 131.6, 131.3, 129.2, 128.8, 128.5, 128.4, 128.1, 126.9, 122.6, 121.4, 86.0, 73.2, 62.6, 62.5, 41.9, 14.0, 14.0. **HRMS (ESI)** ([M+H]<sup>+</sup>) calculated for C<sub>29</sub>H<sub>27</sub>N<sub>2</sub>O<sub>4</sub>: 467.1965, found: 467.1966.

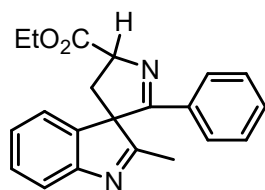

**ethyl 2-methyl-2'-phenyl-4',5'-dihydrospiro[indole-3,3'-pyrrole]-5'-carboxylate(3aj):**

Prepared from diethyl ethyl 2-isocyano-3-(2-methyl-1H-indol-3-yl)propanoate (25.6 mg, 0.1 mmol, 1.0 equiv) and iodobenzene (30.6 mg, 0.15 mmol, 1.5 equiv) according to the general procedure. The product **3aj** was isolated as colorless oil (16.0 mg, 49% yield). (new compound). <sup>1</sup>H NMR (500 MHz, CDCl<sub>3</sub>) δ: 7.67 (d, *J* = 7.8 Hz, 1H), 7.41-7.38 (m, 1H), 7.24 (t, *J* = 7.3 Hz, 1H), 7.24-7.14 (m, 7H), 5.27 (t, *J* = 8.0 Hz, 1H), 4.32 (q, *J* = 7.1 Hz, 2H), 2.82 (dd, *J* = 13.5, 8.0 Hz, 1H), 2.43 (dd, *J* = 13.5, 8.0 Hz, 1H), 2.27 (s, 3H), 1.36 (t, *J* = 7.1 Hz, 3H). <sup>13</sup>C NMR (125 MHz, CDCl<sub>3</sub>) δ: 183.2, 172.8, 171.8, 153.2, 141.4, 131.7, 131.4, 129.1, 128.6, 127.4, 126.7, 121.7, 120.7, 74.4, 73.2, 61.8, 38.2, 16.5, 14.2. HRMS (ESI) ([M+H]<sup>+</sup>) calculated for C<sub>21</sub>H<sub>21</sub>N<sub>2</sub>O<sub>2</sub>: 333.1598, found: 333.1592.

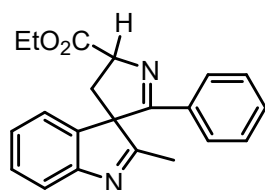

**ethyl 2-methyl-2'-phenyl-4',5'-dihydrospiro[indole-3,3'-pyrrole]-5'-carboxylate(3aj'):**

Prepared from diethyl ethyl 2-isocyano-3-(2-methyl-1H-indol-3-yl)propanoate (25.6 mg, 0.1 mmol, 1.0 equiv) and iodobenzene (30.6 mg, 0.15 mmol, 1.5 equiv) according to the general procedure. The product **3aj'** was isolated as colorless oil (15.9 mg, 48% yield). (new compound). <sup>1</sup>H NMR (500 MHz, CDCl<sub>3</sub>) δ: 7.67 (d, *J* = 7.7 Hz, 1H), 7.43 -7.36 (m, 2H), 7.30 (t, *J* = 7.3 Hz, 1H), 7.22 (d, *J* = 7.7 Hz, 3H), 7.15 (t, *J* = 7.7 Hz, 2H), 5.23 (dd, *J* = 8.5, 6.8 Hz, 1H), 4.34 (q, *J* = 7.0 Hz, 2H), 2.76 (dd, *J* = 14.1, 8.8 Hz, 1H), 2.65 (dd, *J* = 14.1, 6.6 Hz, 1H), 2.29 (s, 3H), 1.38 (t, *J* = 7.1 Hz, 3H). <sup>13</sup>C NMR (125 MHz, CDCl<sub>3</sub>) δ: 182.6, 172.9, 171.9, 153.5, 141.8, 131.8,

131.4, 129.0, 128.6, 127.5, 127.0, 123.0, 120.3, 74.6, 73.0, 61.8, 38.0, 16.3, 14.2.

**HRMS (ESI)** ( $[M+H]^+$ ) calculated for  $C_{21}H_{21}N_2O_2$ : 333.1598, found: 333.1592.

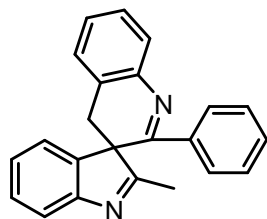

**2-methyl-2'-phenyl-4'H-spiro[indole-3,3'-quinoline] (3ak):**

Prepared from 3-(2-isocyanobenzyl)-2-methyl-1H-indole (24.6 mg, 0.1 mmol, 1.0 equiv) and iodobenzene (30.6 mg, 0.15 mmol, 1.5 equiv) according to the general procedure. The product **3ak** was isolated as colorless oil (27.7 mg, 0.086 mmol, 86% yield). (new compound). **<sup>1</sup>H NMR** (400 MHz,  $CDCl_3$ )  $\delta$ : 7.65 (dd,  $J = 13.4, 7.7$  Hz, 2H), 7.44-7.29 (m, 3H), 7.22 (d,  $J = 15.3$  Hz, 3H), 7.12 (dd,  $J = 19.7, 7.3$  Hz, 3H), 6.97 (t,  $J = 7.9$  Hz, 1H), 6.75 (d,  $J = 7.4$  Hz, 1H), 3.46 (d,  $J = 15.7$  Hz, 1H), 2.52 (d,  $J = 15.7$  Hz, 1H), 2.09 (s, 3H). **<sup>13</sup>C NMR** (100 MHz,  $CDCl_3$ )  $\delta$ : 184.5, 164.2, 153.8, 144.0, 140.6, 138.7, 130.2, 128.9, 128.5, 128.4, 128.0, 127.8, 127.2, 126.3, 125.8, 124.2, 122.6, 120.9, 61.4, 34.8, 17.5. **HRMS (ESI)** ( $[M+H]^+$ ) calculated for  $C_{23}H_{19}N_2$ : 323.1543, found: 323.1536.

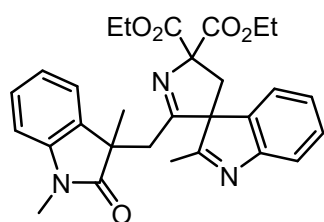

**diethyl 2'-((1,3-dimethyl-2-oxoindolin-3-yl)methyl)-2-methylspiro[indole-3,3'-pyrrole]-5',5'(4'H)-dicarboxylate (5a):**

Prepared from diethyl 2-isocyano-2-((2-methyl-1H-indol-3-yl)methyl)malonate (32.8 mg, 0.1 mmol, 1.0 equiv) and *N*-(2-iodophenyl)-*N*-methylmethacrylamide (45.2 mg, 0.15 mmol, 1.5 equiv) according to the general procedure. The product **5a** was isolated as colorless oil (19.8 mg, 0.040 mmol, 40% yield). (new compound). **<sup>1</sup>H NMR** (400 MHz,  $CDCl_3$ )  $\delta$ : 7.55 (d,  $J = 7.4$  Hz, 1H), 7.37 (td,  $J = 7.4, 1.2$  Hz, 1H), 7.26-7.17 (m, 3H), 7.11 (d,  $J = 7.0$  Hz, 1H), 6.98 (t,  $J = 7.4$  Hz, 1H), 6.80 (d,  $J = 7.8$



Hz, 1H), 4.35-4.29 (m, 2H), 4.12-3.99 (m, 2H), 3.19 (s, 3H), 2.82 (d,  $J = 15.0$  Hz, 1H), 2.73 (d,  $J = 15.0$  Hz, 1H), 2.28 (d,  $J = 18.2$  Hz, 1H), 2.01 (d,  $J = 18.2$  Hz, 1H), 1.94 (s, 3H), 1.35 (t,  $J = 7.2$  Hz, 3H), 1.21-1.17 (m, 6H);  $^{13}\text{C}$  NMR (100 MHz,  $\text{CDCl}_3$ )  $\delta$ : 178.0, 179.8, 175.2, 169.2, 168.9, 155.1, 144.7, 139.6, 133.6, 129.0, 127.7, 126.6, 122.6, 121.8, 121.6, 120.1, 107.8, 87.2, 62.3, 61.9, 45.6, 37.5, 36.1, 26.4, 24.2, 16.3, 14.1, 14.0. **HRMS (APCI)** ( $[\text{M}+\text{H}]^+$ ) calculated for  $\text{C}_{29}\text{H}_{32}\text{N}_3\text{O}_5$ : 502.2336, found: 502.2344.

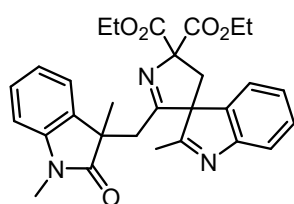

**diethyl 2'-((1,3-dimethyl-2-oxoindolin-3-yl)methyl)-2-methylspiro[indole-3,3'-pyrrole]-5',5'(4'H)-dicarboxylate (5a')**:

Prepared from diethyl 2-isocyano-2-((2-methyl-1H-indol-3-yl)methyl)malonate (32.8 mg, 0.1 mmol, 1.0 equiv) and *N*-(2-iodophenyl)-*N*-methylmethacrylamide (45.2 mg, 0.15 mmol, 1.5 equiv) according to the general procedure. The product **5a'** was isolated as colorless oil (12.1 mg, 0.024 mmol, 24% yield). (new compound).  $^1\text{H}$ NMR (500 MHz,  $\text{CDCl}_3$ )  $\delta$ : 7.55 (d,  $J = 7.7$  Hz, 1H), 7.38 (d,  $J = 8.6$  Hz, 1H), 7.21 (dq,  $J = 13.0, 7.1, 6.6$  Hz, 3H), 7.11 (d,  $J = 7.0$  Hz, 1H), 6.97 (t,  $J = 7.4$  Hz, 1H), 6.79 (d,  $J = 7.7$  Hz, 1H), 4.31 (qd,  $J = 7.1, 1.4$  Hz, 2H), 4.12-3.98 (m, 2H), 3.19 (s, 3H), 2.88-2.68 (m, 2H), 2.28 (d,  $J = 18.3$  Hz, 1H), 2.01 (d,  $J = 18.3$  Hz, 1H), 1.93 (s, 3H), 1.35 (t,  $J = 7.1$  Hz, 3H), 1.17 (d,  $J = 7.1$  Hz, 3H).  $^{13}\text{C}$  NMR (100 MHz,  $\text{CDCl}_3$ )  $\delta$ : 180.3, 180.2, 174.9, 169.1, 169.0, 155.3, 144.6, 139.6, 133.1, 129.1, 127.5, 126.2, 122.8, 122.0, 121.6, 120.2, 107.7, 87.2, 62.2, 62.0, 45.7, 37.5, 35.6, 26.4, 24.3, 16.1, 14.1, 14.0. **HRMS (APCI)** ( $[\text{M}+\text{H}]^+$ ) calculated for  $\text{C}_{29}\text{H}_{32}\text{N}_3\text{O}_5$ : 502.2336, found: 502.2344.

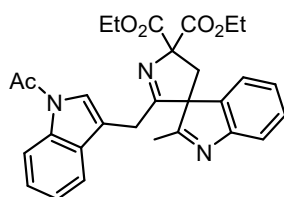

**diethyl 2'-((1-acetyl-1H-indol-3-yl)methyl)-2-methylspiro[indole-3,3'-pyrrole]-5',5'(4'H)-dicarboxylate (5b):**

Prepared from diethyl 2-isocyano-2-((2-methyl-1H-indol-3-yl)methyl)malonate (32.8 mg, 0.1 mmol, 1.0 equiv) and *N*-(2-iodophenyl)-*N*-(propa-1,2-dien-1-yl)acetamide (44.9 mg, 0.15 mmol, 1.5 equiv) according to the general procedure. The product **5b** was isolated as colorless oil (35.0 mg, 0.070 mmol, 70% yield). (new compound). <sup>1</sup>H NMR (500 MHz, CDCl<sub>3</sub>) δ: 8.31 (d, *J* = 7.7 Hz, 1H), 7.51 (d, *J* = 7.7 Hz, 1H), 7.47 (d, *J* = 7.7 Hz, 1H), 7.31-7.25 (m, 2H), 7.20 (t, *J* = 7.6 Hz, 1H), 6.95-6.90 (m, 2H), 6.87 (s, 1H), 4.41-4.35 (m, 4H), 3.43 (d, *J* = 15.3 Hz, 1H), 3.28 (d, *J* = 15.3 Hz, 1H), 3.05 (d, *J* = 15.2 Hz, 1H), 2.86 (d, *J* = 15.2 Hz, 1H), 2.48 (s, 3H), 2.02 (s, 3H), 1.37-1.34 (m, 6H); <sup>13</sup>C NMR (100 MHz, CDCl<sub>3</sub>) δ: 179.9, 177.6, 169.5, 169.2, 168.3, 155.2, 139.9, 135.5, 129.7, 128.8, 126.0, 125.3, 124.2, 123.3, 122.7, 119.8, 119.2, 116.4, 115.4, 86.7, 62.7, 62.7, 38.2, 26.7, 23.8, 16.2, 14.1. HRMS (APCI) ([M+H]<sup>+</sup>) calculated for C<sub>29</sub>H<sub>30</sub>N<sub>3</sub>O<sub>5</sub>: 500.2180, found: 500.2178.

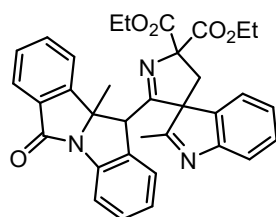

**diethyl 2-methyl-2'-(10b-methyl-6-oxo-10b,11-dihydro-6H-isoindolo[2,1-a]indol-11-yl)spiro[indole-3,3'-pyrrole]-5',5'(4'H)-dicarboxylate (5c):**

Prepared from diethyl 2-isocyano-2-((2-methyl-1H-indol-3-yl)methyl)malonate (32.8 mg, 0.1 mmol, 1.0 equiv) and (2-bromophenyl)(2-methyl-1H-indol-1-yl)methanone (47.1 mg, 0.15 mmol, 1.5 equiv) according to the general procedure. The product **5c** was isolated as colorless oil (34.8 mg, 0.062 mmol, 62% yield). (new compound). <sup>1</sup>H NMR (400 MHz, CDCl<sub>3</sub>) δ: 7.82 (d, *J* = 7.5 Hz, 1H), 7.73 (d, *J* = 7.8 Hz, 1H), 7.68 (d, *J* = 7.6 Hz, 1H), 7.60 (td, *J* = 7.5, 1.0 Hz, 1H), 7.53 (td, *J* = 7.6, 1.2 Hz, 1H), 7.49 (td, *J* = 6.7, 1.2 Hz, 1H), 7.44 (td, *J* = 7.4, 0.8 Hz, 1H), 7.36-7.32 (m, 1H), 7.30-7.27 (m, 1H), 7.12 (d, *J* = 7.6 Hz, 1H), 7.02-7.01 (m, 2H), 4.05-3.95 (m, 3H), 3.85-3.81 (m, 1H), 2.93-2.89 (m, 2H), 2.44 (d, *J* = 14.9 Hz, 1H), 2.02 (s, 3H), 1.24 (s, 3H), 1.20 (t, *J* = 7.2 Hz, 3H), 1.00 (t, *J* = 7.1 Hz, 3H); <sup>13</sup>C NMR (100 MHz, CDCl<sub>3</sub>) δ: 179.6, 175.7, 169.2, 168.1, 166.9, 155.9, 147.2, 139.2, 138.7, 135.1, 134.9, 131.6, 129.6, 129.2, 128.3, 126.0, 125.9, 124.0, 123.6, 123.3, 122.6, 120.6, 117.8, 86.9, 77.7, 75.3, 62.3, 61.8, 48.8, 36.9, 27.2, 17.7, 13.7, 13.6. HRMS (ESI) ([M+H]<sup>+</sup>) calculated for

C<sub>34</sub>H<sub>32</sub>N<sub>3</sub>O<sub>5</sub>: 562.2336, found: 562.2338.

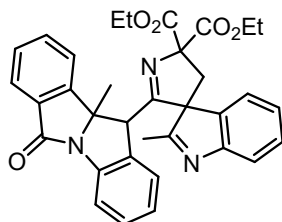

**diethyl 2-methyl-2'-(10b-methyl-6-oxo-10b,11-dihydro-6H-isoindolo[2,1-a]indol-11-yl)spiro[indole-3,3'-pyrrole]-5',5'(4'H)-dicarboxylate (5c')**:

Prepared from diethyl 2-isocyano-2-((2-methyl-1H-indol-3-yl)methyl)malonate (32.8 mg, 0.1 mmol, 1.0 equiv) and (2-bromophenyl)(2-methyl-1H-indol-1-yl)methanone (47.1 mg, 0.15 mmol, 1.5 equiv) according to the general procedure. The product **5c'** was isolated as colorless oil (18.0 mg, 0.032 mmol, 32% yield). (new compound). <sup>1</sup>H NMR (400 MHz, CDCl<sub>3</sub>) δ: 7.86 (d, *J* = 6.9 Hz, 1H), 7.57-7.50 (m, 2H), 7.48-7.42 (m, 3H), 7.40-7.36 (m, 1H), 7.23-7.20 (m, 1H), 7.11 (td, *J* = 7.4, 0.8 Hz, 1H), 7.11 (td, *J* = 7.4, 0.8 Hz, 1H), 6.81 (td, *J* = 7.6, 1.0 Hz, 1H), 6.48 (d, *J* = 7.3 Hz, 1H), 6.10 (d, *J* = 7.5 Hz, 1H), 4.20-4.10 (m, 3H), 4.01-3.94 (m, 1H), 3.62 (s, 1H), 2.80 (d, *J* = 14.9 Hz, 1H), 2.46 (d, *J* = 14.9 Hz, 1H), 2.28 (s, 3H), 1.47 (s, 3H), 1.24 (t, *J* = 7.2 Hz, 3H), 1.15 (t, *J* = 7.2 Hz, 3H); <sup>13</sup>C NMR (100 MHz, CDCl<sub>3</sub>) δ: 179.2, 176.7, 168.7, 168.6, 165.9, 155.3, 147.2, 138.5, 137.7, 135.3, 133.9, 131.6, 129.4, 129.3, 128.5, 126.7, 126.3, 124.4, 123.9, 123.2, 120.1, 116.7, 86.6, 75.2, 62.3, 62.2, 51.0, 37.8, 28.7, 17.4, 13.9, 13.8. HRMS (ESI) ([M+H]<sup>+</sup>) calculated for C<sub>34</sub>H<sub>32</sub>N<sub>3</sub>O<sub>5</sub>: 562.2336, found: 562.2338.

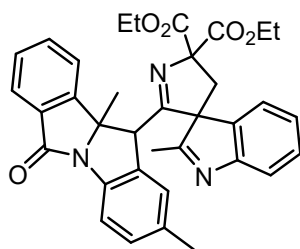

**diethyl 2'-(2,10b-dimethyl-6-oxo-10b,11-dihydro-6H-isoindolo[2,1-a]indol-11-yl)-2-methylspiro[indole-3,3'-pyrrole]-5',5'(4'H)-dicarboxylate (5d)**:

Prepared from diethyl 2-isocyano-2-((2-methyl-1H-indol-3-yl)methyl)malonate (32.8 mg, 0.1 mmol, 1.0 equiv) and (2-bromophenyl)(2,5-dimethyl-1H-indol-1-yl)methanone (49.2 mg, 0.15 mmol, 1.5 equiv) according to the general procedure.

The product **5d** was isolated as colorless oil (25.9 mg, 0.045 mmol, 45% yield). (new compound). <sup>1</sup>H NMR (400 MHz, CDCl<sub>3</sub>) δ: 7.81 (d, *J* = 7.5 Hz, 1H), 7.66 (d, *J* = 7.6 Hz, 1H), 7.61-7.57 (m, 2H), 7.54-7.50 (m, 1H), 7.46 (t, *J* = 7.5 Hz, 1H), 7.41 (t, *J* = 7.2 Hz, 1H), 7.30 (d, *J* = 7.3 Hz, 1H), 7.15 (t, *J* = 7.6 Hz, 2H), 6.72 (s, 1H), 4.07-3.97 (m, 3H), 3.87-3.83 (m, 1H), 2.95 (s, 1H), 2.86 (d, *J* = 14.9 Hz, 1H), 2.45 (d, *J* = 15.0 Hz, 1H), 2.28 (s, 3H), 2.00 (s, 3H), 1.25 (s, 3H), 1.20 (t, *J* = 7.2 Hz, 3H), 1.03 (t, *J* = 7.0 Hz, 3H), <sup>13</sup>C NMR (100 MHz, CDCl<sub>3</sub>) δ: 179.6, 176.1, 169.1, 168.3, 166.7, 155.8, 147.2, 139.4, 136.4, 135.0, 134.8, 133.2, 131.5, 129.7, 129.6, 128.2, 126.8, 126.0, 123.9, 123.1, 122.7, 120.6, 117.3, 86.8, 75.5, 62.3, 61.8, 49.1, 37.0, 27.4, 21.1, 17.6, 13.8, 13.6. HRMS (APCI) ([M+H]<sup>+</sup>) calculated for C<sub>35</sub>H<sub>34</sub>N<sub>3</sub>O<sub>5</sub>: 576.2493, found: 576.2490

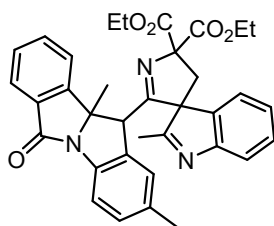

**diethyl 2'-(2,10b-dimethyl-6-oxo-10b,11-dihydro-6H-isoindolo[2,1-a]indol-11-yl)-2-methylspiro[indole-3,3'-pyrrole]-5',5'(4'H)-dicarboxylate (**5d'**):**

Prepared from diethyl 2-isocyano-2-((2-methyl-1H-indol-3-yl)methyl)malonate (32.8 mg, 0.1 mmol, 1.0 equiv) and (2-bromophenyl)(2,5-dimethyl-1H-indol-1-yl)methanone (49.2 mg, 0.15 mmol, 1.5 equiv) according to the general procedure. The product **5d'** was isolated as colorless oil (14.4 mg, 0.025 mmol, 25% yield). (new compound). <sup>1</sup>H NMR (400 MHz, CDCl<sub>3</sub>) δ: 7.85 (d, *J* = 7.5 Hz, 1H), 7.56-7.48 (m, 3H), 7.44-7.35 (m, 3H), 7.12 (t, *J* = 7.5 Hz, 1H), 7.01 (d, *J* = 8.0 Hz, 1H), 6.57 (d, *J* = 7.4 Hz, 1H), 5.64 (s, 1H), 4.18-4.07 (m, 3H), 3.96-3.90 (m, 1H), 3.47 (s, 1H), 2.88 (d, *J* = 14.6 Hz, 1H), 2.42 (d, *J* = 14.6 Hz, 1H), 2.31, (s, 3H), 2.14, (s, 3H), 1.45 (s, 3H), 1.22 (t, *J* = 7.1 Hz, 3H), 1.12 (t, *J* = 7.2 Hz, 3H); <sup>13</sup>C NMR (100 MHz, CDCl<sub>3</sub>) δ: 179.5, 176.3, 168.9, 168.5, 166.0, 155.3, 147.4, 138.0, 135.9, 135.4, 134.3, 132.7, 131.5, 129.6, 129.3, 128.3, 127.4, 126.1, 124.3, 124.2, 122.6, 120.3, 116.5, 86.7, 75.3,

62.3, 62.1, 50.6, 37.7, 28.4, 21.1, 17.3, 13.8, 13.7. **HRMS (APCI) ([M+H]<sup>+</sup>)** calculated for C<sub>35</sub>H<sub>34</sub>N<sub>3</sub>O<sub>5</sub>: 576.2493, found: 576.2490

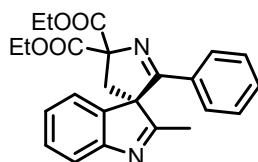

**diethyl (R)-2-methyl-2'-phenylspiro[indole-3,3'-pyrrole]-5',5'(4'H)-dicarboxylate (3a')**:

Prepared from diethyl 2-isocyano-2-((2-methyl-1H-indol-3-yl)methyl)malonate (32.8 mg, 0.1 mmol, 1.0 equiv) and iodobenzene (30.6 mg, 0.15 mmol, 1.5 equiv) according to the general procedure. The product **3a'** was isolated as colorless oil (38.4 mg, 0.095 mmol, 95% yield). (new compound).  $[\alpha]_D^{25} = +55.3$  (c = 0.11 in CHCl<sub>3</sub>, 49% ee). <sup>1</sup>H NMR (400 MHz, CDCl<sub>3</sub>) δ: 7.63 (d, *J* = 7.7 Hz, 1H), 7.40 (t, *J* = 7.6 Hz, 1H), 7.34-7.28 (m, 4H), 7.21-7.14 (m, 3H), 7.45-7.36 (m, 4H), 3.23 (d, *J* = 14.7 Hz, 1H), 2.85 (d, *J* = 14.7 Hz, 1H), 2.23 (s, 3H), 1.37 (q, *J* = 6.6 Hz, 6H); <sup>13</sup>C NMR (100 MHz, CDCl<sub>3</sub>) δ: 182.0, 174.7, 169.8, 169.3, 154.6, 141.9, 131.6, 131.5, 129.0, 128.5, 127.9, 126.6, 122.7, 120.6, 85.9, 75.0, 62.7, 62.6, 40.2, 16.4, 16.1. **HRMS (ESI) ([M+H]<sup>+</sup>)** calculated for C<sub>24</sub>H<sub>25</sub>N<sub>2</sub>O<sub>4</sub>: 405.1809, found: 405.1806. The enantiomeric ratio was determined by Daicel Chiralcel AD-H (0.46 cm × 25 cm), Hexanes/IPA = 10/1, 1.0 mL/min, λ = 254 nm, t (major) = 13.2 min, t (minor) = 9.1 min.

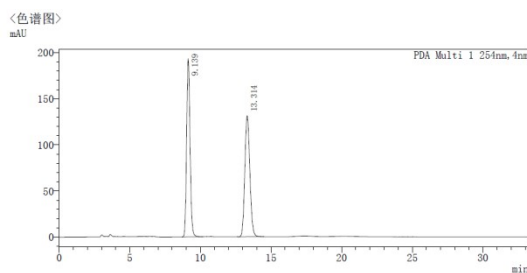

| NO. | Ret. Time | Area (aU*min) | Height (aU) | Rel. Area % | Resolution(USP) |
|-----|-----------|---------------|-------------|-------------|-----------------|
| 1   | 9.139     | 325614        | 192583      | 50.027      | 0.450           |
| 2   | 13.314    | 322115        | 131122      | 49.973      | 0.658           |
| 总计  |           | 650729        | 323706      | 100.000     |                 |

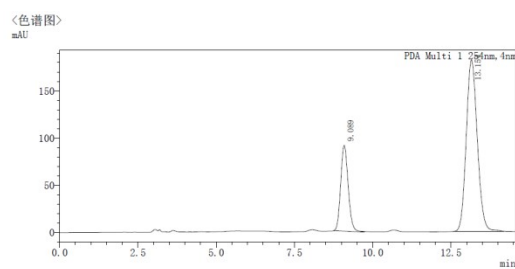

| NO. | Ret. Time | Area (aU*min) | Height (aU) | Rel. Area % | Resolution(USP) |
|-----|-----------|---------------|-------------|-------------|-----------------|
| 1   | 9.089     | 1514396       | 90919       | 25.332      | 0.445           |
| 2   | 13.154    | 4463914       | 181717      | 74.668      | 0.650           |
| 总计  |           | 5978309       | 272635      | 100.000     |                 |

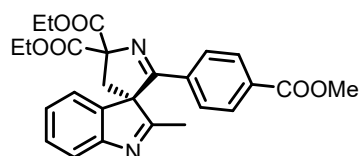

**diethyl (R)-2'-(4-(methoxycarbonyl)phenyl)-2-methylspiro[indole-3,3'-pyrrole]-**

### 5',5'(4'H)-dicarboxylate (**3q'**):

Prepared from diethyl 2-isocyano-2-((2-methyl-1H-indol-3-yl)methyl)malonate (32.8 mg, 0.1 mmol, 1.0 equiv) and methyl 4-iodobenzoate (39.3 mg, 0.15 mmol, 1.5 equiv) according to the general procedure. The product **3q'** was isolated as colorless oil (37.0 mg, 0.080 mmol, 80% yield): mp 86-87 °C. (new compound).  $[\alpha]_D^{25} = +35.3$  ( $c = 0.1$  in  $\text{CHCl}_3$ , 30% ee).  $^1\text{H NMR}$  (400 MHz,  $\text{CDCl}_3$ )  $\delta$ : 7.74 (d,  $J = 8.6$  Hz, 2H), 7.55 (d,  $J = 7.7$  Hz, 1H), 7.33 (td,  $J = 7.6, 1.2$  Hz, 1H), 7.29-7.26 (m, 2H), 7.19 (d,  $J = 7.4$  Hz, 1H), 7.12 (td,  $J = 7.4, 0.7$  Hz, 1H), 4.37-4.20 (m, 4H), 3.78 (s, 3H), 3.17 (d,  $J = 14.7$  Hz, 1H), 2.80 (d,  $J = 14.7$  Hz, 1H), 2.15 (s, 3H), 1.33-1.28 (m, 6H);  $^{13}\text{C NMR}$  (100 MHz,  $\text{CDCl}_3$ )  $\delta$ : 181.3, 174.2, 169.5, 169.0, 166.1, 154.8, 141.5, 135.4, 132.7, 129.6, 129.3, 127.8, 126.7, 122.6, 120.7, 86.1, 75.0, 62.8, 62.7, 52.2, 40.1, 16.3, 14.0. **HRMS (ESI)** ( $[\text{M}+\text{H}]^+$ ) calculated for  $\text{C}_{26}\text{H}_{27}\text{N}_2\text{O}_6$ : 463.1864, found: 463.1857. The enantiomeric ratio was determined by Daicel Chiralcel AD-H (0.46 cm  $\times$  25 cm), Hexanes/IPA = 10/1, 1.0 mL/min,  $\lambda = 254$  nm,  $t$  (major) = 17.6 min,  $t$  (minor) = 11.5 min.

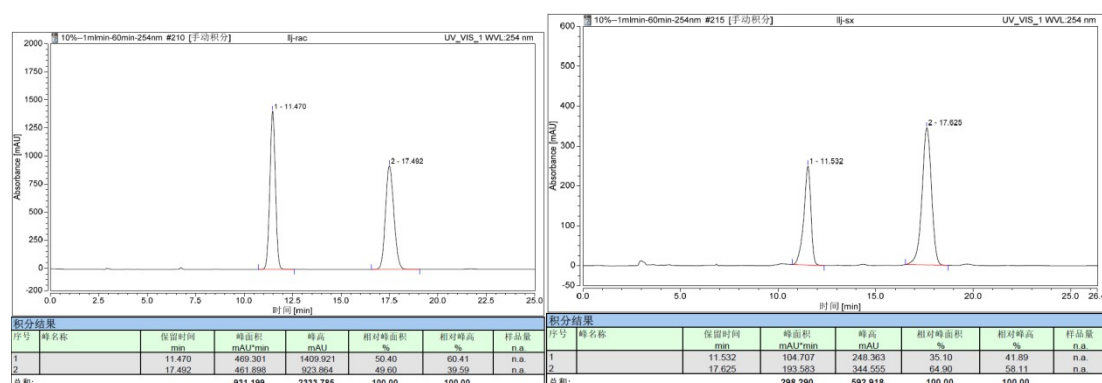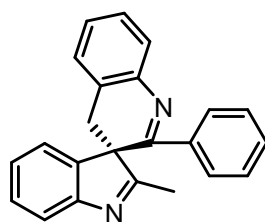

### (R)-2-methyl-2'-phenyl-4'H-spiro[indole-3,3'-quinoline] (**3ak'**):

Prepared from 3-(2-isocyanobenzyl)-2-methyl-1H-indole (24.6 mg, 0.1 mmol, 1.0 equiv) and iodobenzene (30.6 mg, 0.15 mmol, 1.5 equiv) according to the general procedure. The product **3ak'** was isolated as colorless oil (27.7 mg, 0.086 mmol, 86% yield). (new compound).  $[\alpha]_D^{25} = +65.3$  ( $c = 0.15$  in  $\text{CHCl}_3$ , 85% ee).  $^1\text{H NMR}$  (400

MHz, CDCl<sub>3</sub>)  $\delta$ : 7.65 (dd,  $J = 13.4, 7.7$  Hz, 2H), 7.44-7.29 (m, 3H), 7.22 (d,  $J = 15.3$  Hz, 3H), 7.12 (dd,  $J = 19.7, 7.3$  Hz, 3H), 6.97 (t,  $J = 7.9$  Hz, 1H), 6.75 (d,  $J = 7.4$  Hz, 1H), 3.46 (d,  $J = 15.7$  Hz, 1H), 2.52 (d,  $J = 15.7$  Hz, 1H), 2.09 (s, 3H). <sup>13</sup>C NMR (100 MHz, CDCl<sub>3</sub>)  $\delta$ : 184.5, 164.2, 153.8, 144.0, 140.6, 138.7, 130.2, 128.9, 128.5, 128.4, 128.0, 127.8, 127.2, 126.3, 125.8, 124.2, 122.6, 120.9, 61.4, 34.8, 17.5. HRMS (ESI) ([M+H]<sup>+</sup>) calculated for C<sub>23</sub>H<sub>19</sub>N<sub>2</sub>: 323.1543, found: 323.1536. The enantiomeric ratio was determined by Daicel Chiralcel AD-H (0.46 cm  $\times$  25 cm), Hexanes/IPA = 95/5, 1.0 mL/min,  $\lambda = 254$  nm,  $t$  (major) = 15.3 min,  $t$  (minor) = 11.7 min.

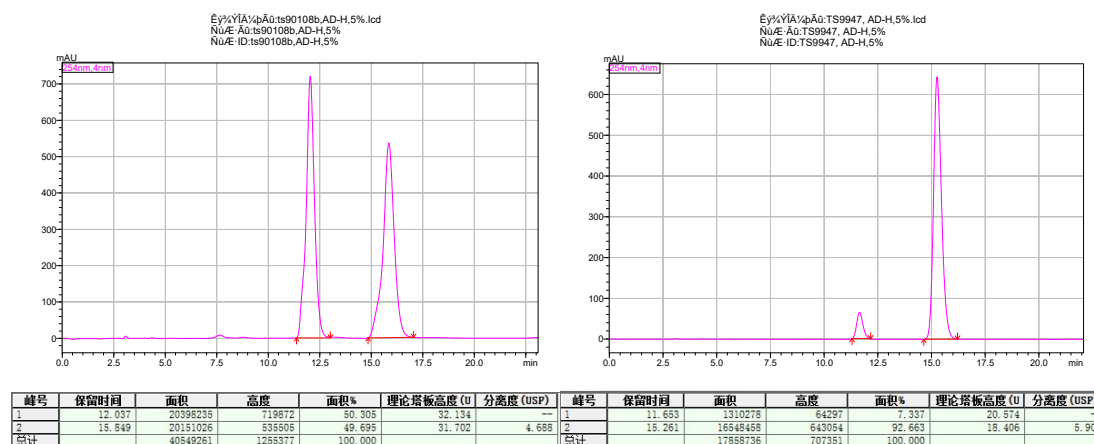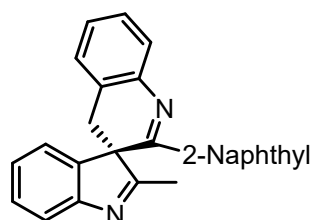

**(R)-2-methyl-2'-(naphthalen-1-yl)-4'H-spiro[indole-3,3'-quinoline] (6a):**

Prepared from diethyl 2-isocyano-2-((2-methyl-1H-indol-3-yl)methyl)malonate (24.6 mg, 0.1 mmol, 1.0 equiv) and methyl 4-iodobenzoate (39.3 mg, 0.15 mmol, 1.5 equiv) according to the general procedure. The product **6a** was isolated as colorless oil (15.4 mg, 0.063 mmol, 63% yield). (new compound).  $[\alpha]_D^{25} = +31.8$  ( $c = 0.40$  in CHCl<sub>3</sub>, 84% ee). <sup>1</sup>H NMR (500 MHz, CDCl<sub>3</sub>)  $\delta$ : 7.74-7.60 (m, 6H), 7.45-7.34 (m, 4H), 7.33-7.13 (m, 3H), 7.08 (d,  $J = 7.4$  Hz, 1H), 6.96 (t,  $J = 7.5$  Hz, 1H), 6.76 (d,  $J = 7.4$  Hz, 1H), 3.45 (d,  $J = 15.7$  Hz, 1H), 2.56 (d,  $J = 15.7$  Hz, 1H), 2.06 (s, 3H). <sup>13</sup>C NMR (125 MHz, CDCl<sub>3</sub>)  $\delta$ : 184.5, 164.1, 154.1, 144.1, 141.0, 136.1, 134.1, 132.8, 129.0, 128.9,

128.5, 128.2, 128.0, 127.8, 127.5, 127.3, 127.1, 126.4, 126.3, 125.9, 124.3, 123.6, 122.7, 121.0, 61.6, 35.1, 17.6. **HRMS (ESI)** ( $[M+H]^+$ ) calculated for  $C_{27}H_{21}N_2$ : 373.1699, found: 373.1695. The enantiomeric ratio was determined by Daicel Chiralcel AS-H (0.46 cm  $\times$  25 cm), Hexanes/IPA = 97.5/2.5, 1.0 mL/min,  $\lambda$  = 254 nm,  $t$  (major) = 11.8 min,  $t$  (minor) = 10.6 min.

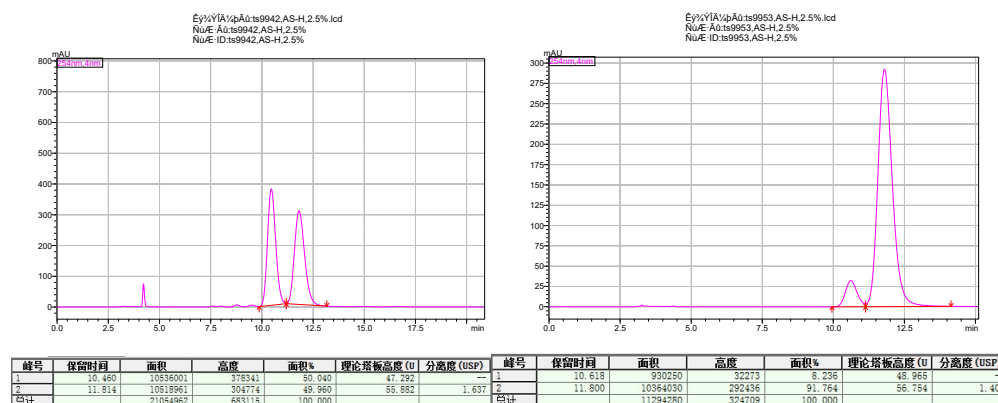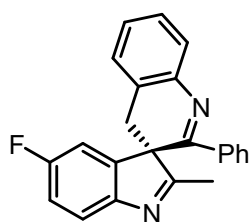

**(R)-5-fluoro-2-methyl-2'-phenyl-4'H-spiro[indole-3,3'-quinoline] (6b):**

Prepared from 5-fluoro-3-(2-isocyanobenzyl)-2-methyl-1H-indole (26.4 mg, 0.1 mmol, 1.0 equiv) and methyl 4-iodobenzoate (39.3 mg, 0.15 mmol, 1.5 equiv) according to the general procedure. The product **6b** was isolated as colorless oil (22.4 mg, 0.066 mmol, 66% yield). (new compound).  $[\alpha]_D^{25} = +10.1$  ( $c = 0.40$  in  $CHCl_3$ , 85% ee).  $^1H$ NMR (500 MHz,  $CDCl_3$ )  $\delta$ : 7.61-7.54 (m, 2H), 7.39 (t,  $J = 7.6$  Hz, 1H), 7.31-7.28 (m, 1H), 7.21 (dd,  $J = 9.7, 6.8$  Hz, 3H), 7.12-6.99 (m, 4H), 6.40 (dd,  $J = 7.9, 2.5$  Hz, 1H), 3.41 (d,  $J = 15.7$  Hz, 1H), 2.50 (d,  $J = 15.8$  Hz, 1H), 2.03 (s, 3H).  $^{13}C$  NMR (125 MHz,  $CDCl_3$ )  $\delta$ : 184.4, 163.4, 160.9 (d,  $J = 195.0$  Hz), 150.0, 143.8, 142.4 (d,  $J = 7.2$  Hz), 138.5, 130.4, 128.7, 128.6, 128.0, 127.3, 126.2, 123.7, 121.6 (d,  $J = 7.2$  Hz), 115.7 (d,  $J = 18.8$  Hz), 110.4 (d,  $J = 20.2$  Hz), 61.7, 34.8, 17.5.  $^{19}F$  NMR (376 MHz,  $CDCl_3$ )  $\delta$ : -123.75. **HRMS (ESI)** ( $[M+H_3O]^+$ ) calculated for  $C_{23}H_{20}FN_2O$ : 359.1554, found: 359.1545. The enantiomeric ratio was determined by Daicel Chiralcel AD-H



(0.46 cm × 25 cm), Hexanes/IPA = 90/10, 1.0 mL/min,  $\lambda = 254$  nm,  $t$  (major) = 11.8 min,  $t$  (minor) = 7.1 min.

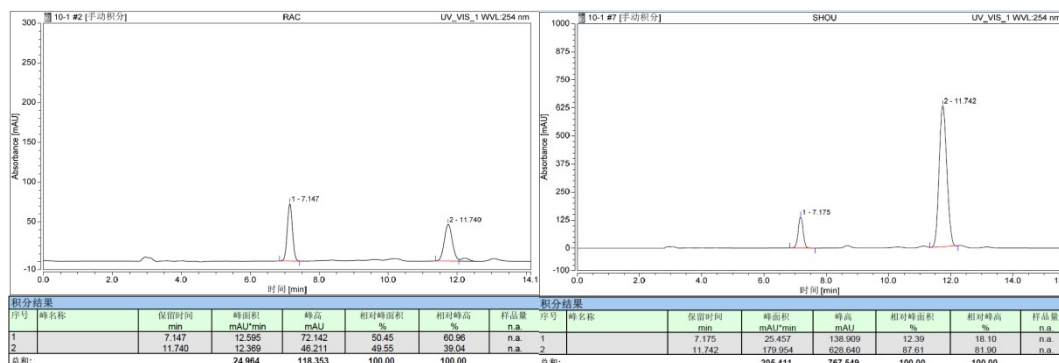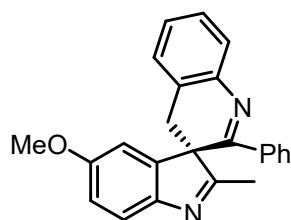

**(R)-5-methoxy-2-methyl-2'-phenyl-4'H-spiro[indole-3,3'-quinoline] (6c):**

Prepared from 3-(2-isocyanobenzyl)-5-methoxy-2-methyl-1H-indole (27.6 mg, 0.1 mmol, 1.0 equiv) and methyl 4-iodobenzoate (39.3 mg, 0.15 mmol, 1.5 equiv) according to the general procedure. The product **6c** was isolated as colorless oil (24.6 mg, 0.070 mmol, 70% yield). (new compound).  $[\alpha]_D^{25} = +58.6$  ( $c = 0.10$  in  $\text{CHCl}_3$ , 84% ee).  $^1\text{H NMR}$  (500 MHz,  $\text{CDCl}_3$ )  $\delta$ : 7.59 (d,  $J = 7.7$  Hz, 1H), 7.38 (t,  $J = 7.5$  Hz, 1H), 7.33 (d,  $J = 8.4$  Hz, 1H), 7.31-7.06 (m, 8H), 6.91 (t,  $J = 8.2$  Hz, 1H), 3.78 (s, 2H), 3.47 (d,  $J = 16.4$  Hz, 1H), 2.89 (d,  $J = 16.4$  Hz, 1H), 2.01 (s, 3H).  $^{13}\text{C NMR}$  (125 MHz,  $\text{CDCl}_3$ )  $\delta$ : 184.7, 165.2, 160.0, 154.1, 145.1, 140.9, 138.9, 130.4, 129.1, 128.7, 128.7, 126.5, 126.0, 122.8, 121.1, 116.3, 114.1, 112.2, 62.0, 55.7, 34.4, 17.7. **HRMS (ESI)** ( $[\text{M}+\text{H}]^+$ ) calculated for  $\text{C}_{24}\text{H}_{21}\text{N}_2\text{O}$ : 353.1648, found: 353.1641. The enantiomeric ratio was determined by Daicel Chiralcel AD-H (0.46 cm × 25 cm), Hexanes/IPA = 95/5, 1.0 mL/min,  $\lambda = 254$  nm,  $t$  (major) = 31.0 min,  $t$  (minor) = 20.5 min.

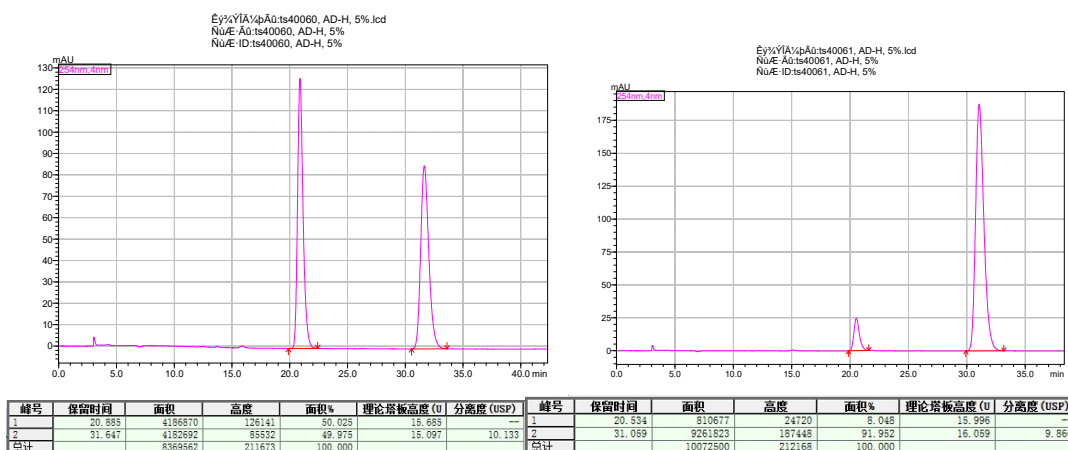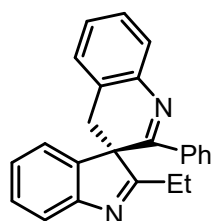

**(R)-2-ethyl-2'-phenyl-4'H-spiro[indole-3,3'-quinoline] (6d):**

Prepared from 2-ethyl-3-(2-isocyanobenzyl)-1H-indole (26.0 mg, 0.1 mmol, 1.0 equiv) and methyl 4-iodobenzoate (39.3 mg, 0.15 mmol, 1.5 equiv) according to the general procedure. The product **6d** was isolated as colorless oil (25.2 mg, 0.075 mmol, 75% yield). (new compound).  $[\alpha]_D^{25} = +40.3$  ( $c = 0.1$  in  $\text{CHCl}_3$ , 85% ee).  $^1\text{H NMR}$  (500 MHz,  $\text{CDCl}_3$ )  $\delta$ : 7.71 (d,  $J = 7.8$  Hz, 1H), 7.62 (d,  $J = 7.7$  Hz, 1H), 7.44-7.33 (m, 2H), 7.32-7.27 (m, 1H), 7.24-7.20 (m, 3H), 7.16-7.05 (m, 3H), 6.99-6.95 (m, 1H), 6.74 (d,  $J = 7.3$  Hz, 1H), 3.47 (d,  $J = 15.7$  Hz, 1H), 2.58-2.39 (m, 2H), 2.25-2.15 (m, 1H), 1.12 (t,  $J = 7.3$  Hz, 3H).  $^{13}\text{C NMR}$  (125 MHz,  $\text{CDCl}_3$ )  $\delta$ : 188.8, 164.6, 154.1, 144.1, 140.6, 139.0, 130.1, 128.9, 128.4, 128.4, 128.0, 127.7, 127.3, 126.3, 125.8, 124.4, 122.6, 121.1, 61.7, 35.0, 24.4, 10.6. **HRMS (ESI)** ( $[\text{M}+\text{H}]^+$ ) calculated for  $\text{C}_{24}\text{H}_{21}\text{N}_2$ : 337.1699, found: 337.1694. The enantiomeric ratio was determined by Daicel Chiralcel AD-H (0.46 cm  $\times$  25 cm), Hexanes/IPA = 95/5, 1.0 mL/min,  $\lambda = 254$  nm,  $t$  (major) = 13.4 min,  $t$  (minor) = 10.1 min.

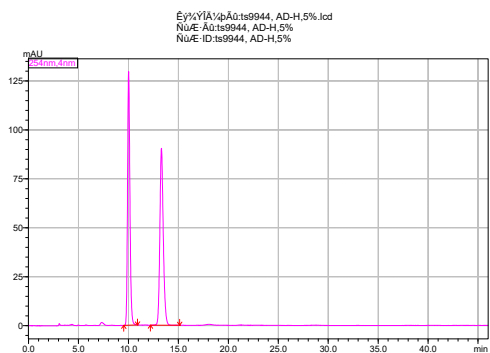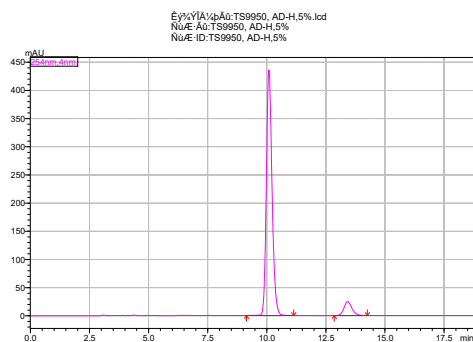

| 峰号 | 保留时间   | 面积      | 高度     | 面积%     | 理论塔板高度 (U) | 分离度 (USP) |
|----|--------|---------|--------|---------|------------|-----------|
| 1  | 10.020 | 2139213 | 129535 | 49.786  | 17.673     | --        |
| 2  | 13.304 | 2157632 | 90383  | 80.214  | 20.399     | 6.221     |
| 总计 |        | 4296844 | 219918 | 100.000 |            |           |

| 峰号 | 保留时间   | 面积      | 高度     | 面积%     | 理论塔板高度 (U) | 分离度 (USP) |
|----|--------|---------|--------|---------|------------|-----------|
| 1  | 10.090 | 1260438 | 435718 | 92.463  | 17.929     | --        |
| 2  | 13.422 | 591856  | 24869  | 7.537   | 20.142     | 6.266     |
| 总计 |        | 7852294 | 460607 | 100.000 |            |           |

## 4. $^1\text{H}$ and $^{13}\text{C}$ NMR spectra of all products

(1a)

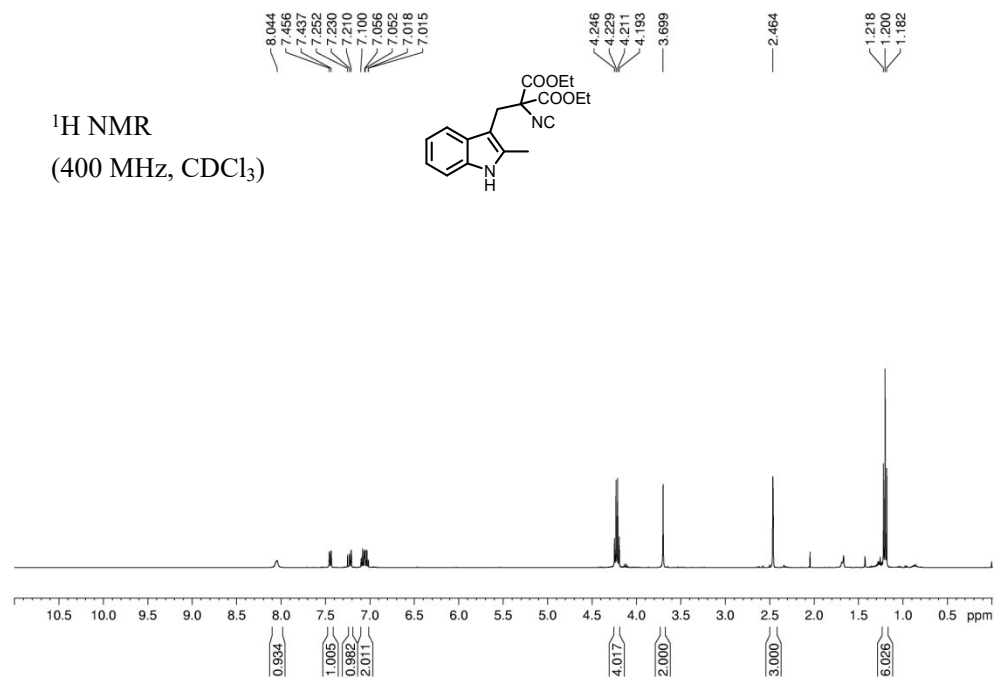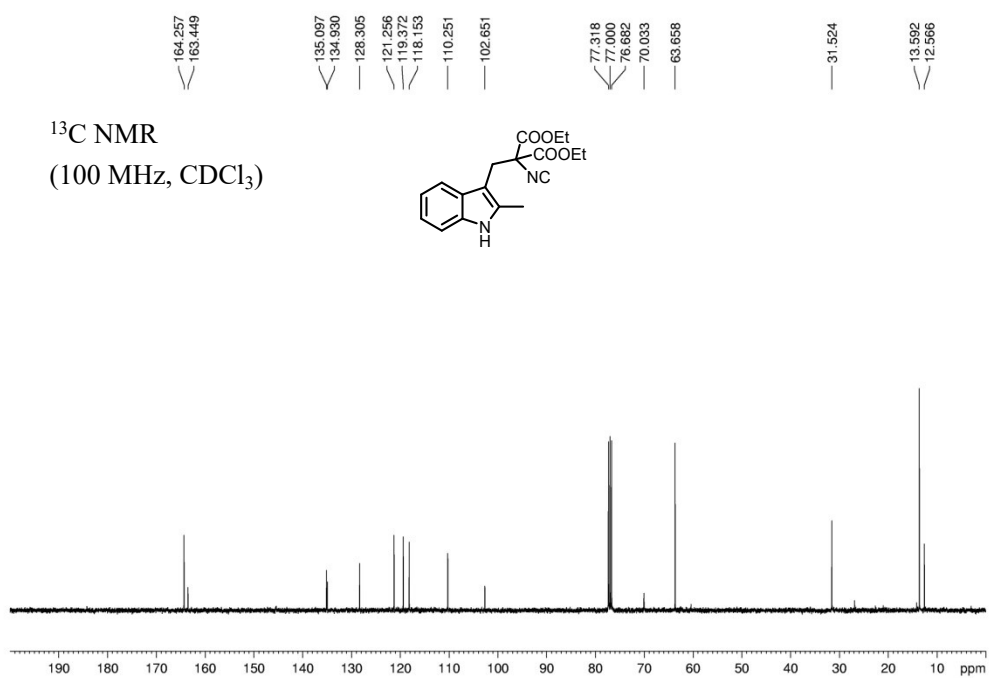

(1b)

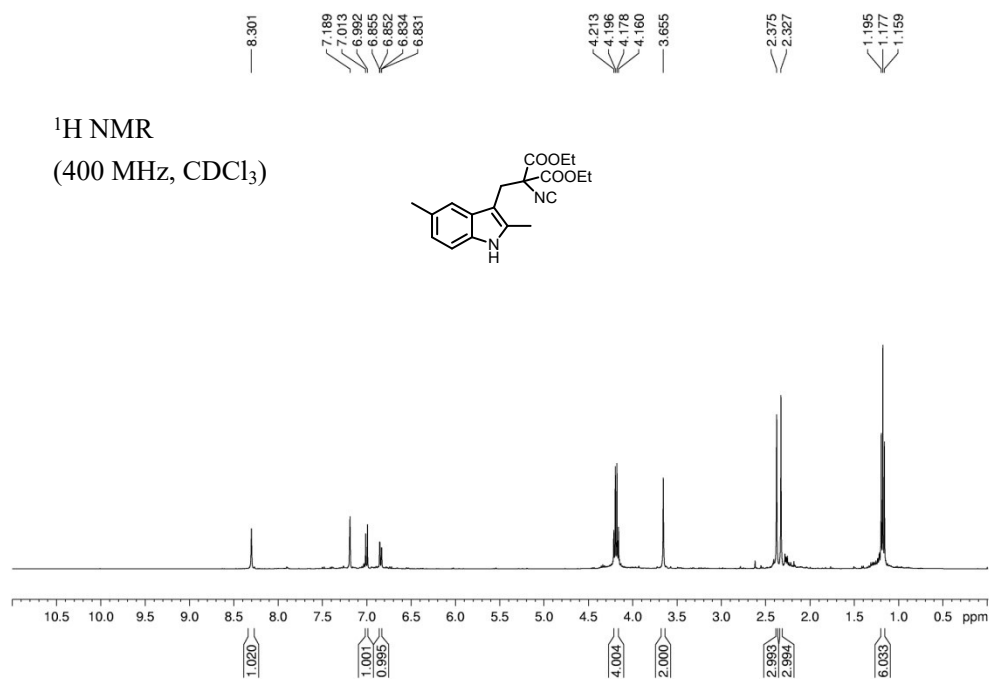

<sup>13</sup>C NMR  
(100 MHz, CDCl<sub>3</sub>)

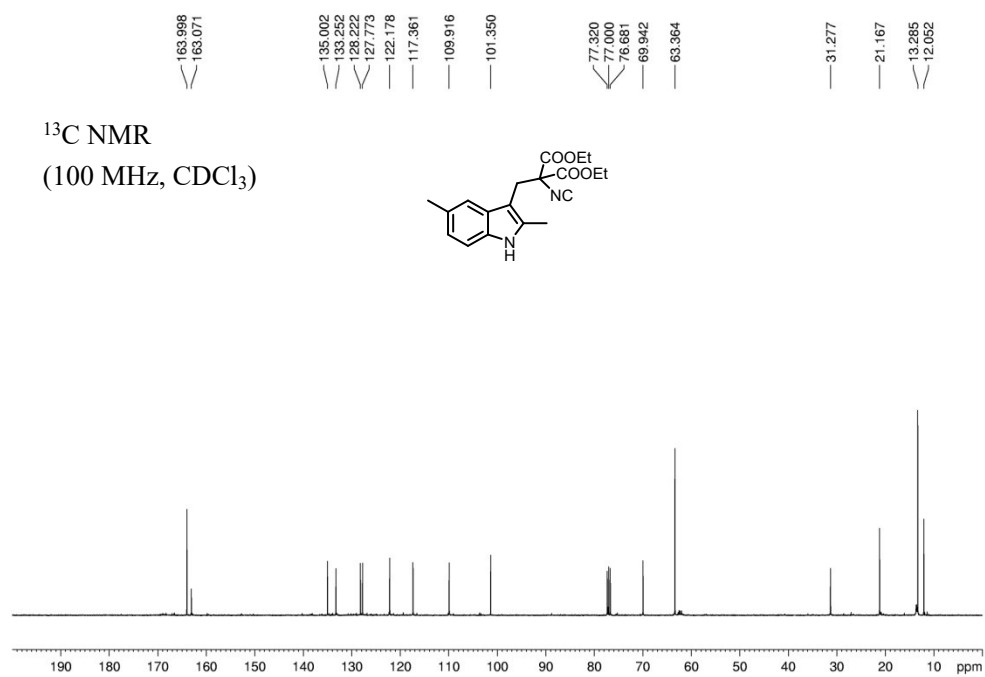

(1c)

$^1\text{H}$  NMR  
(400 MHz,  $\text{CDCl}_3$ )

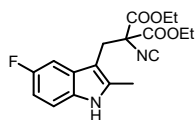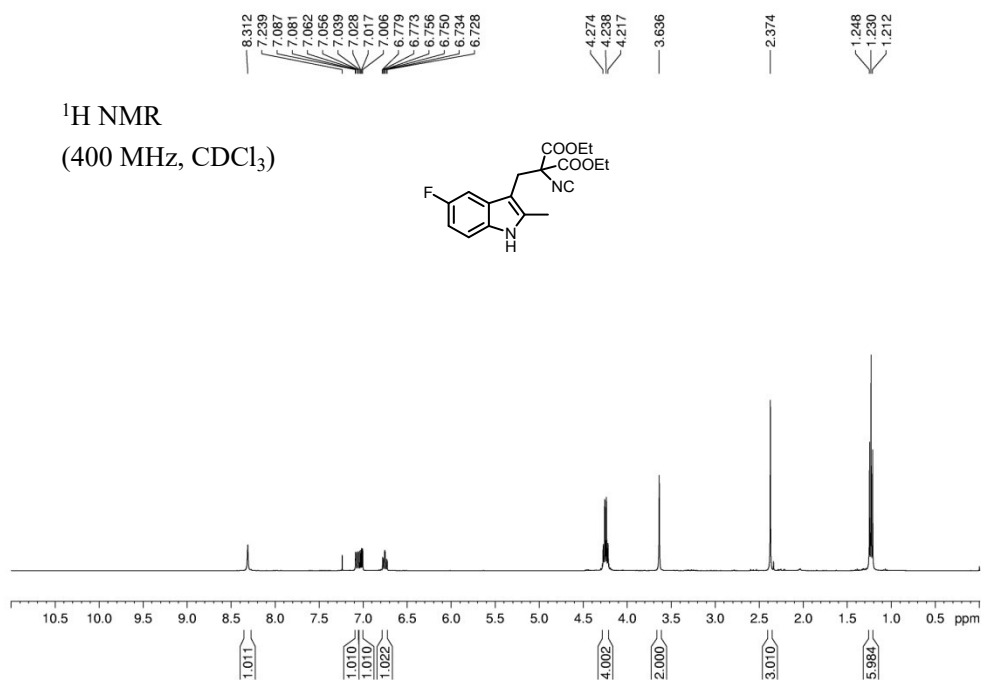

$^{13}\text{C}$  NMR  
(100 MHz,  $\text{CDCl}_3$ )

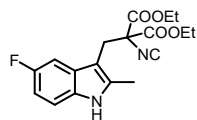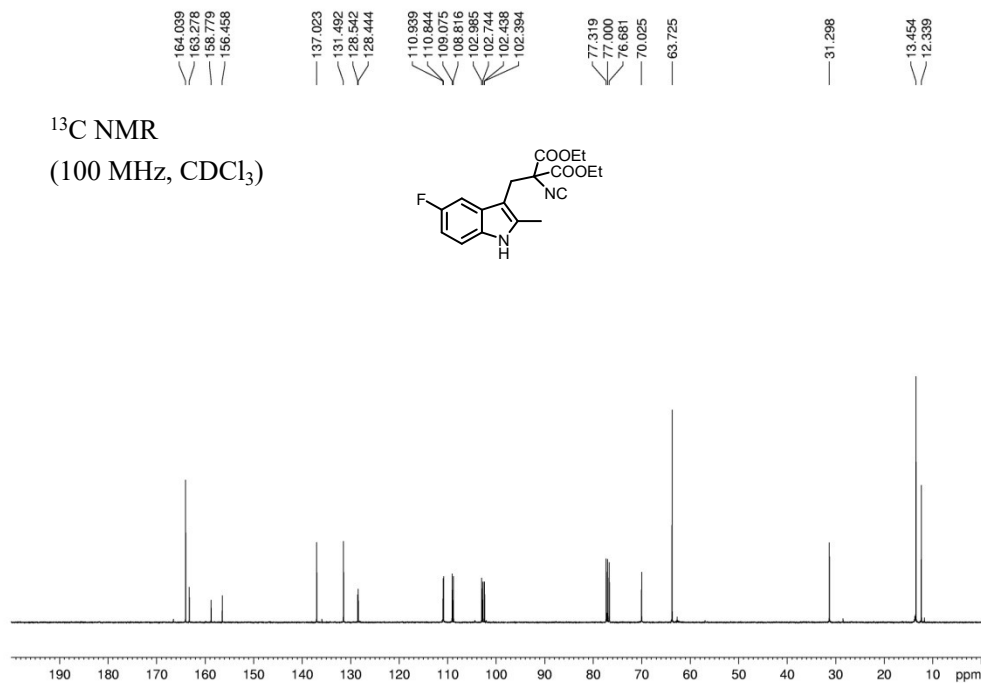

(1d)

$^1\text{H}$  NMR  
(400 MHz,  $\text{CDCl}_3$ )

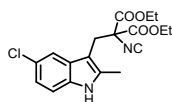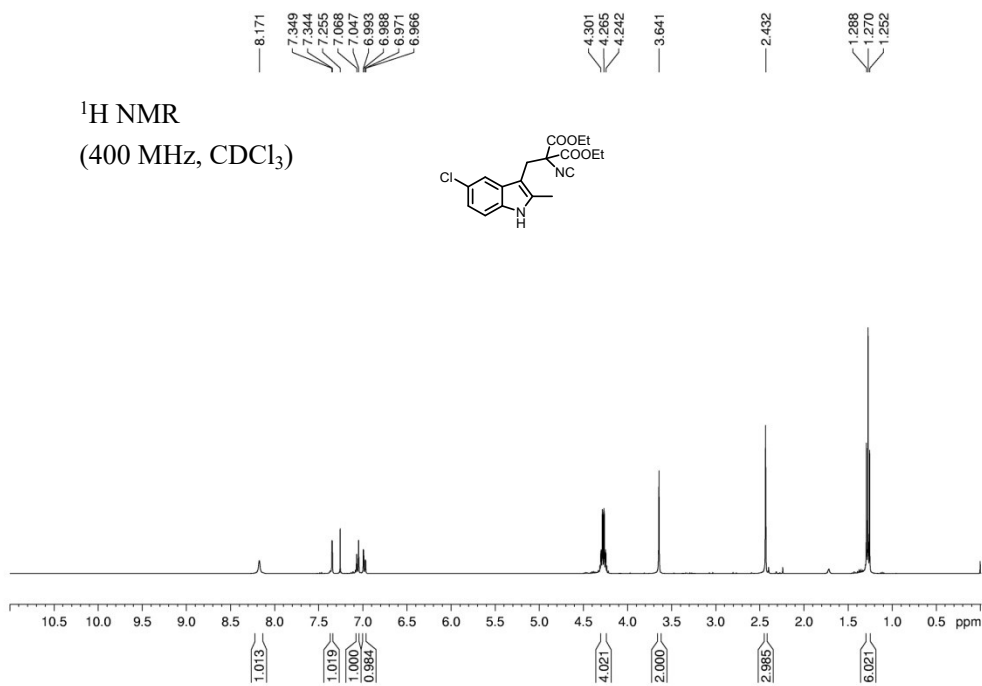

$^{13}\text{C}$  NMR  
(100 MHz,  $\text{CDCl}_3$ )

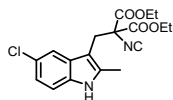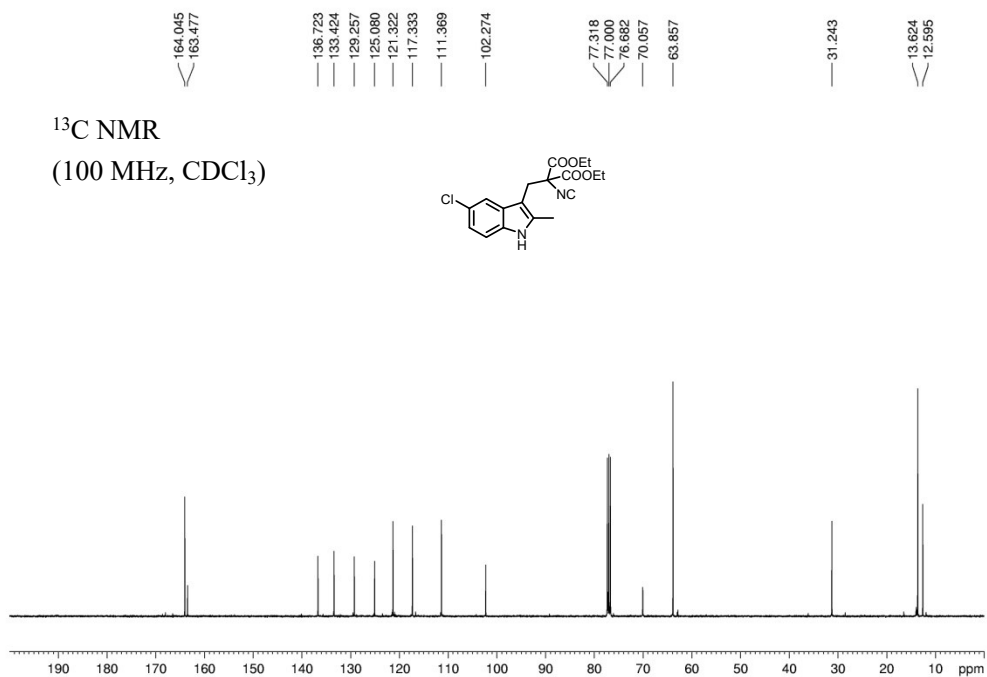

(1e)

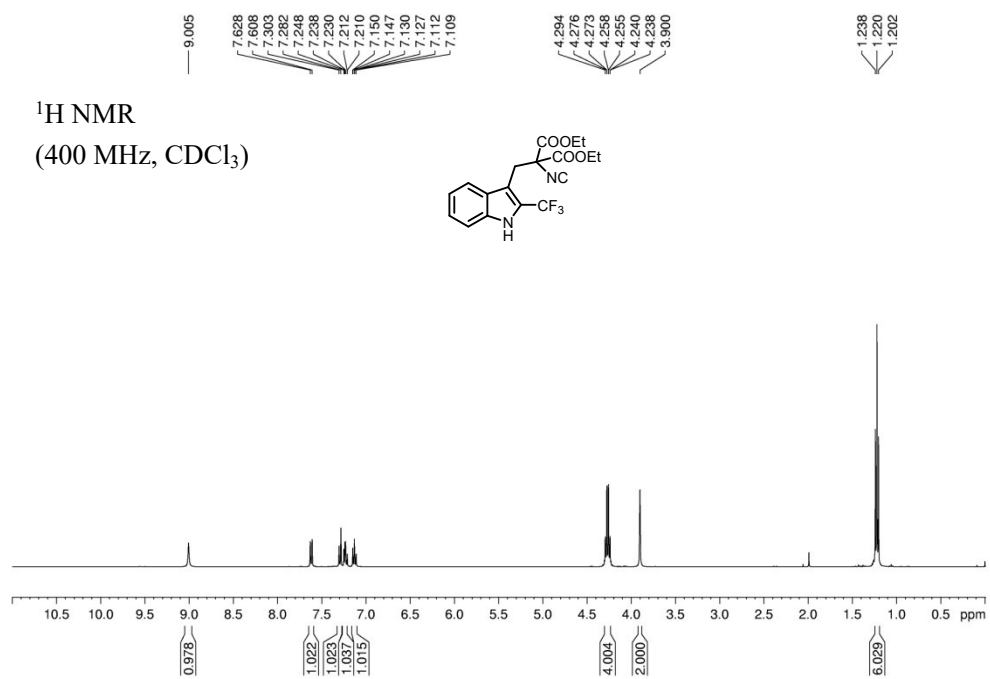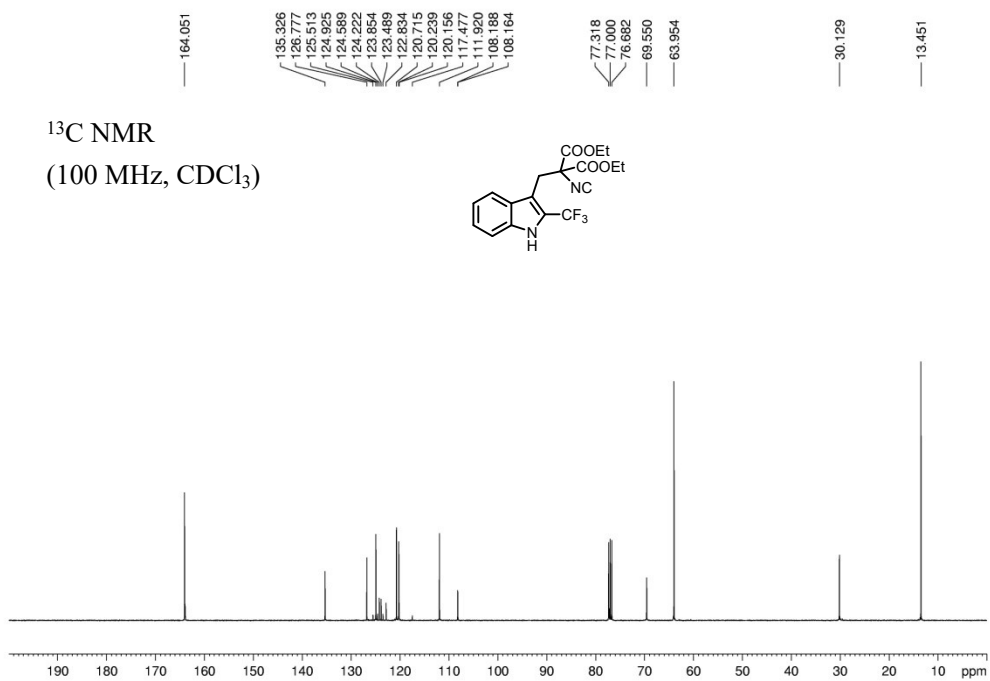



(1f)

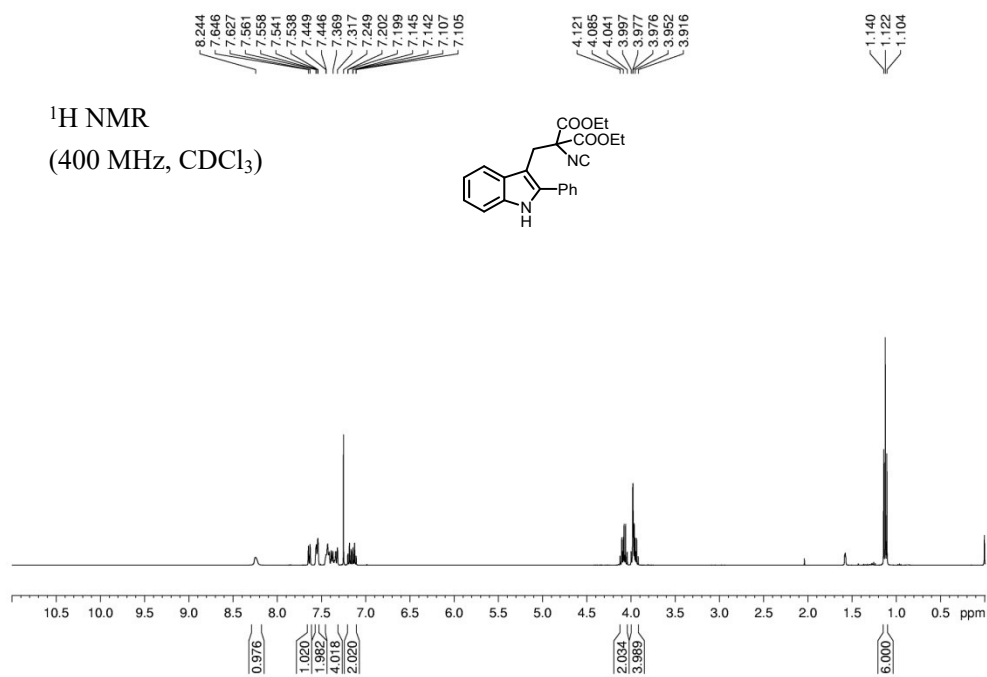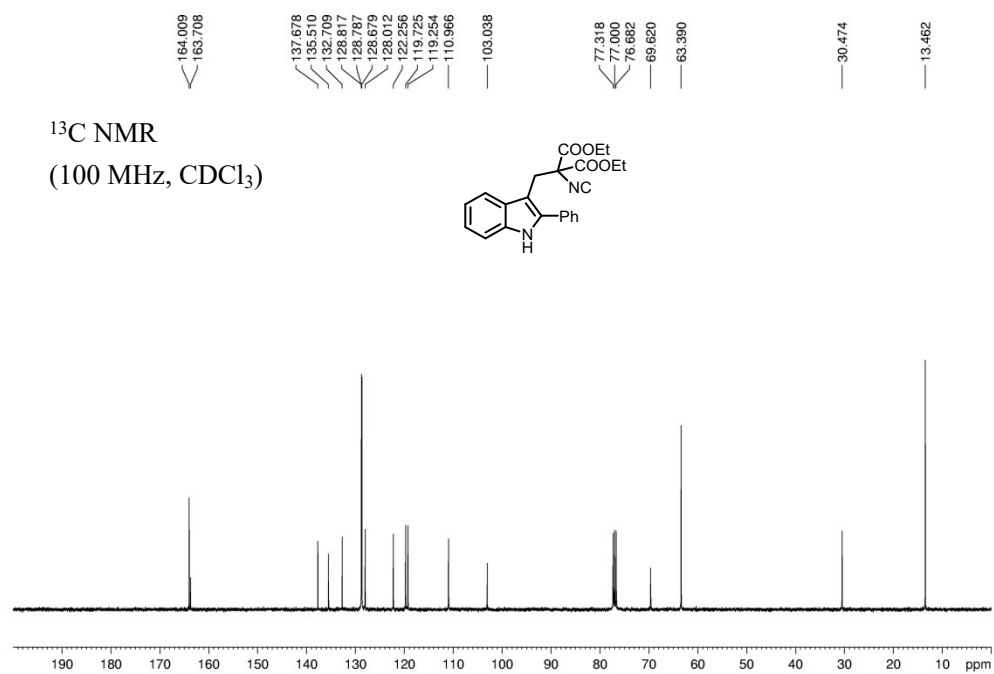

**(1g)**

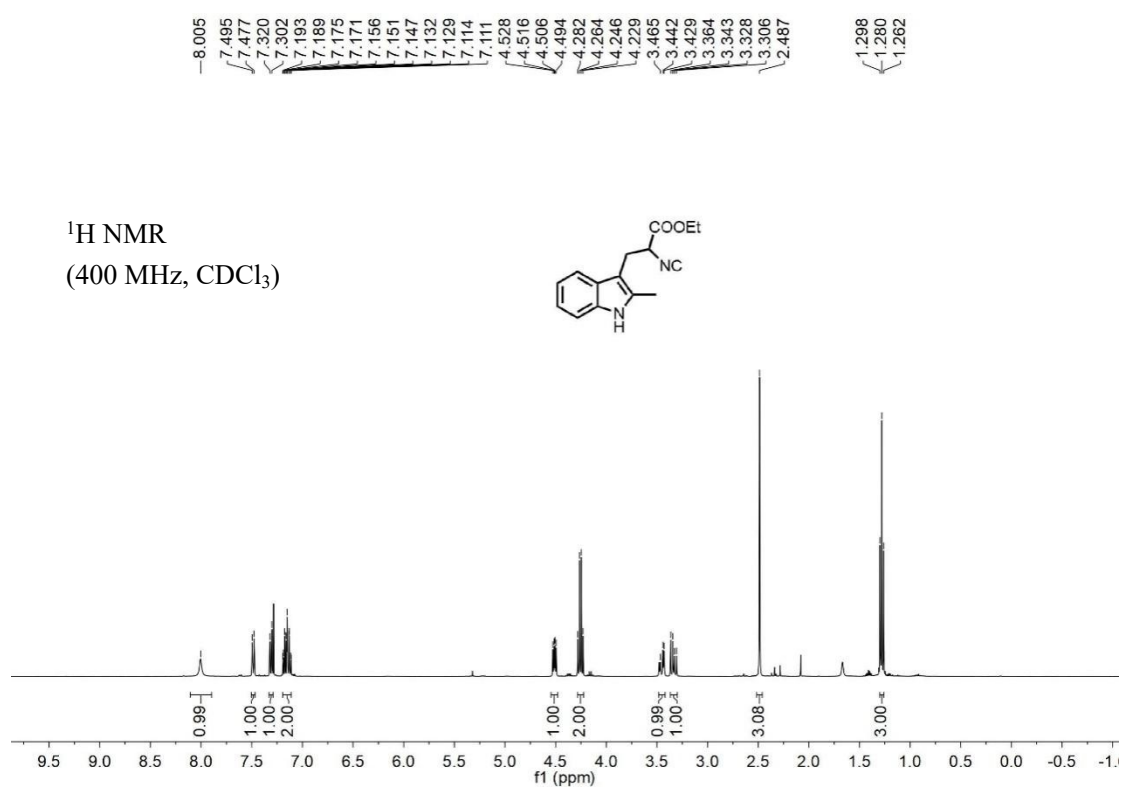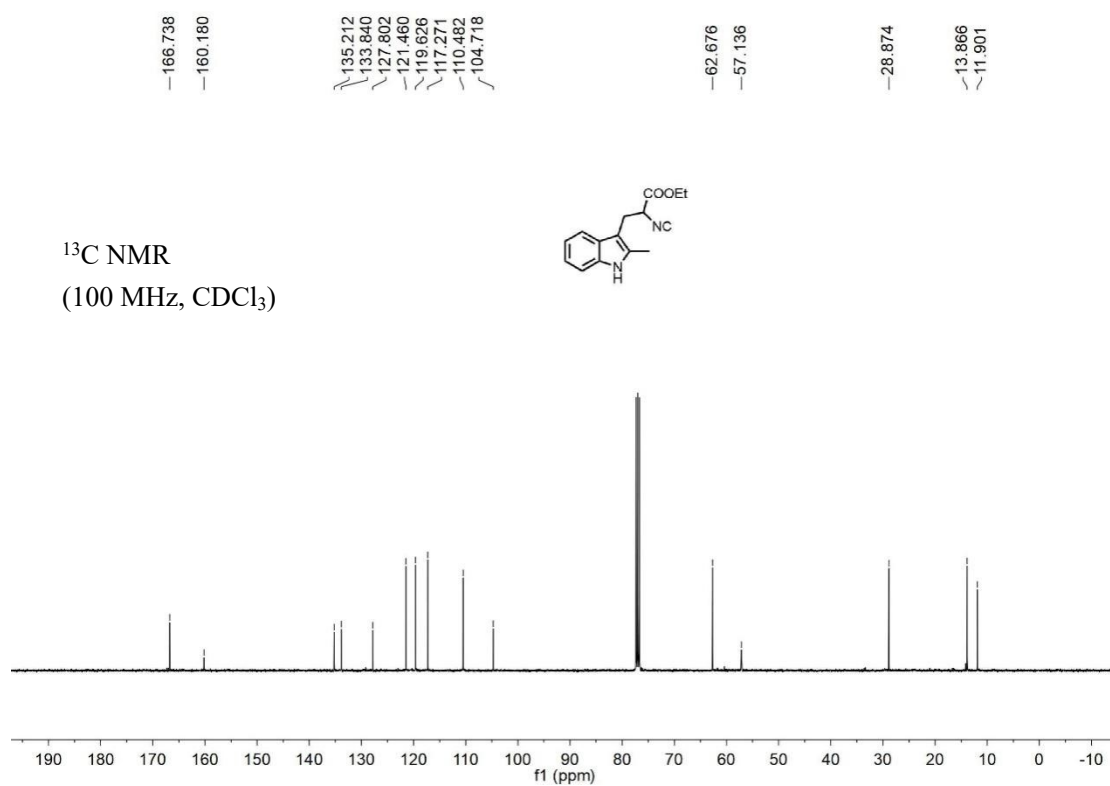

(1h)

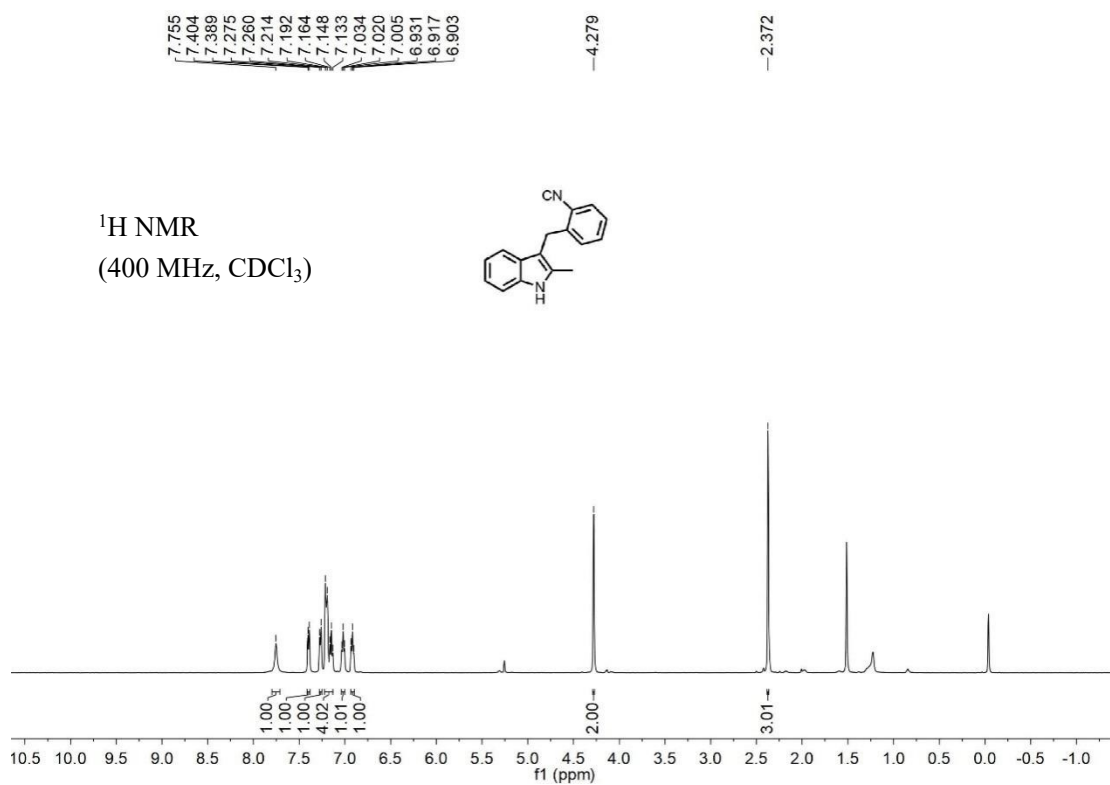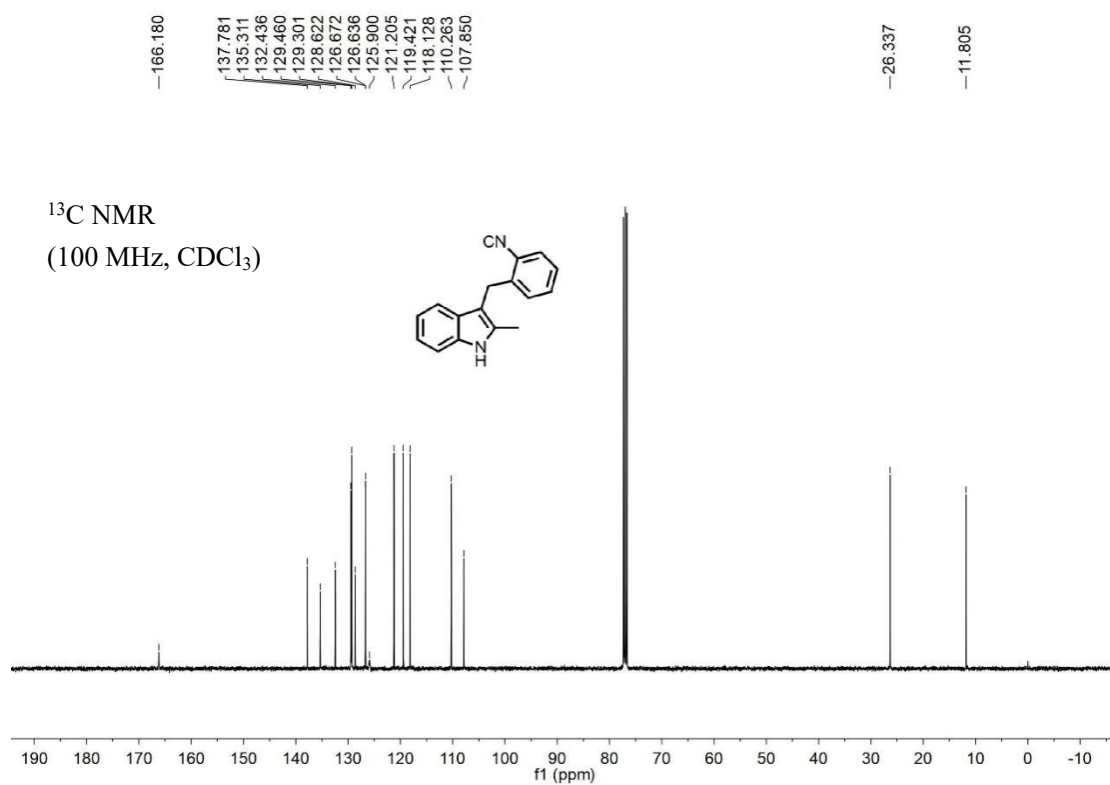

(1i)

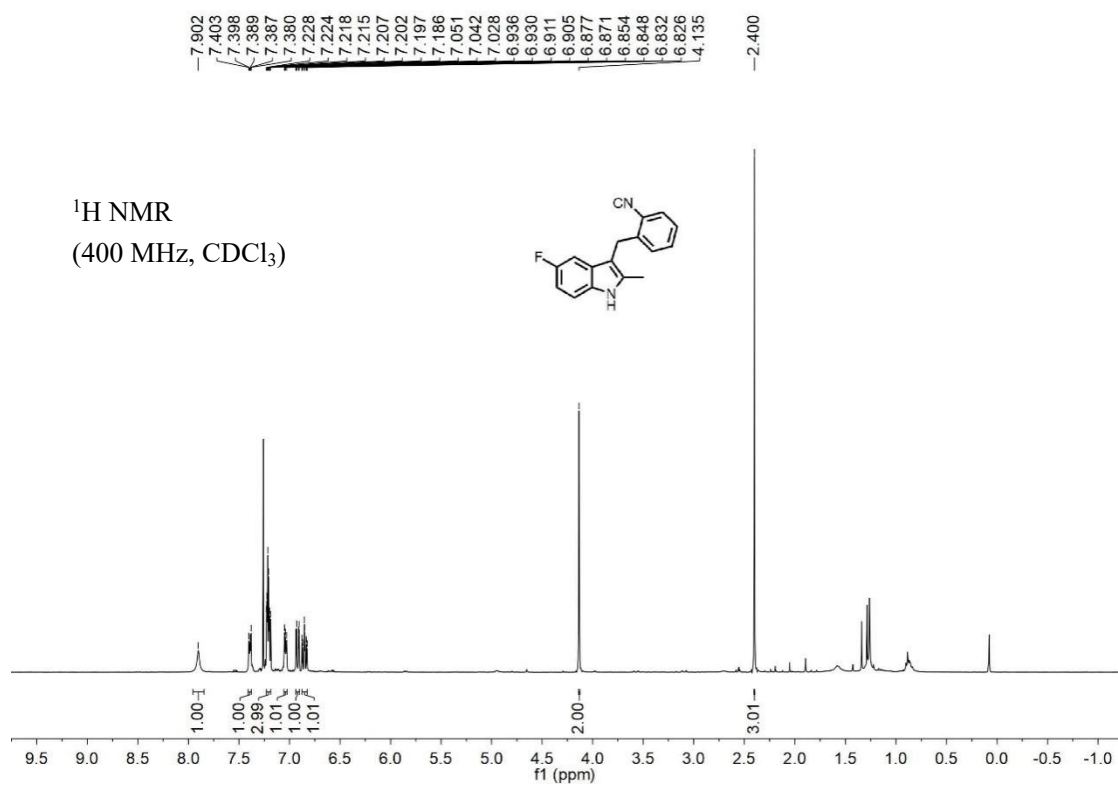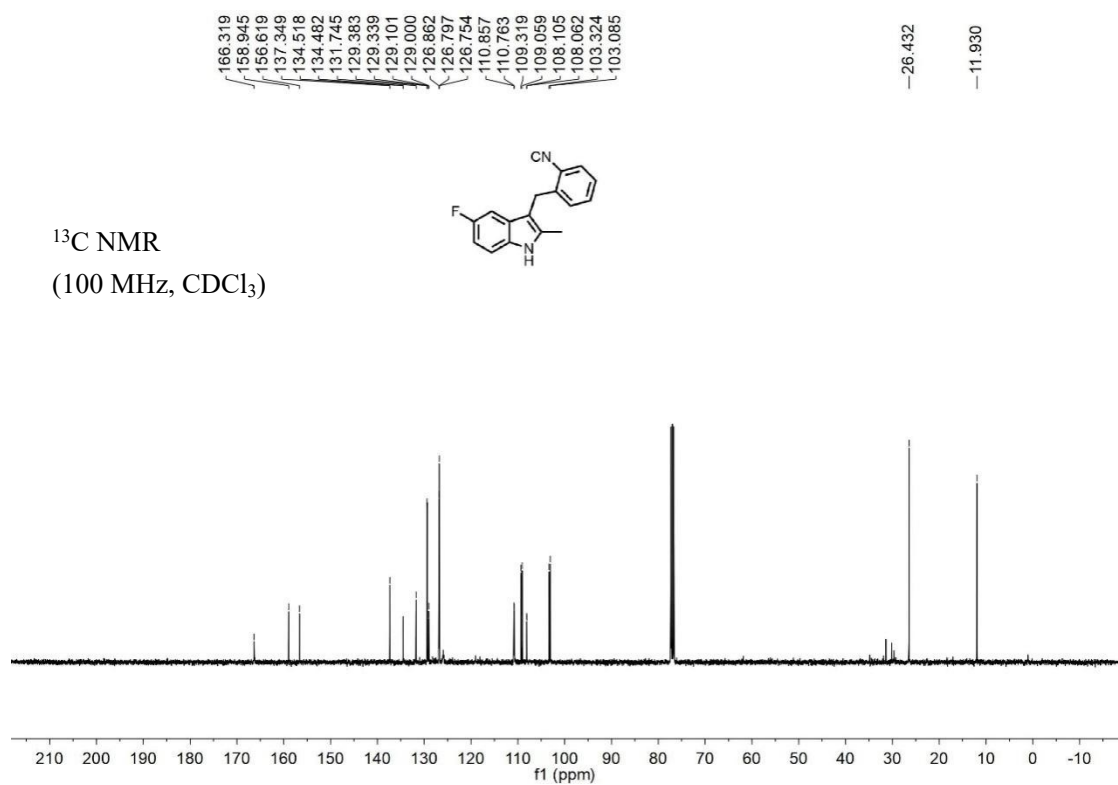

$^{19}\text{F}$  NMR  
(376 MHz,  $\text{CDCl}_3$ )

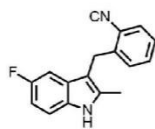

-124.570

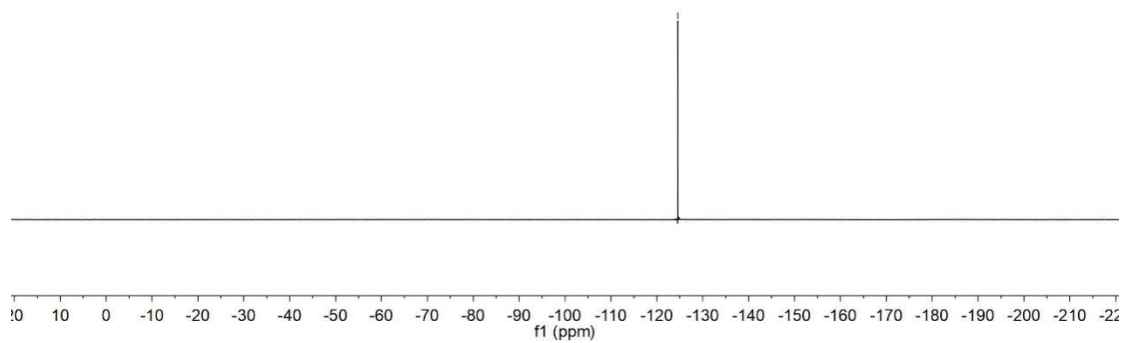

(1j)

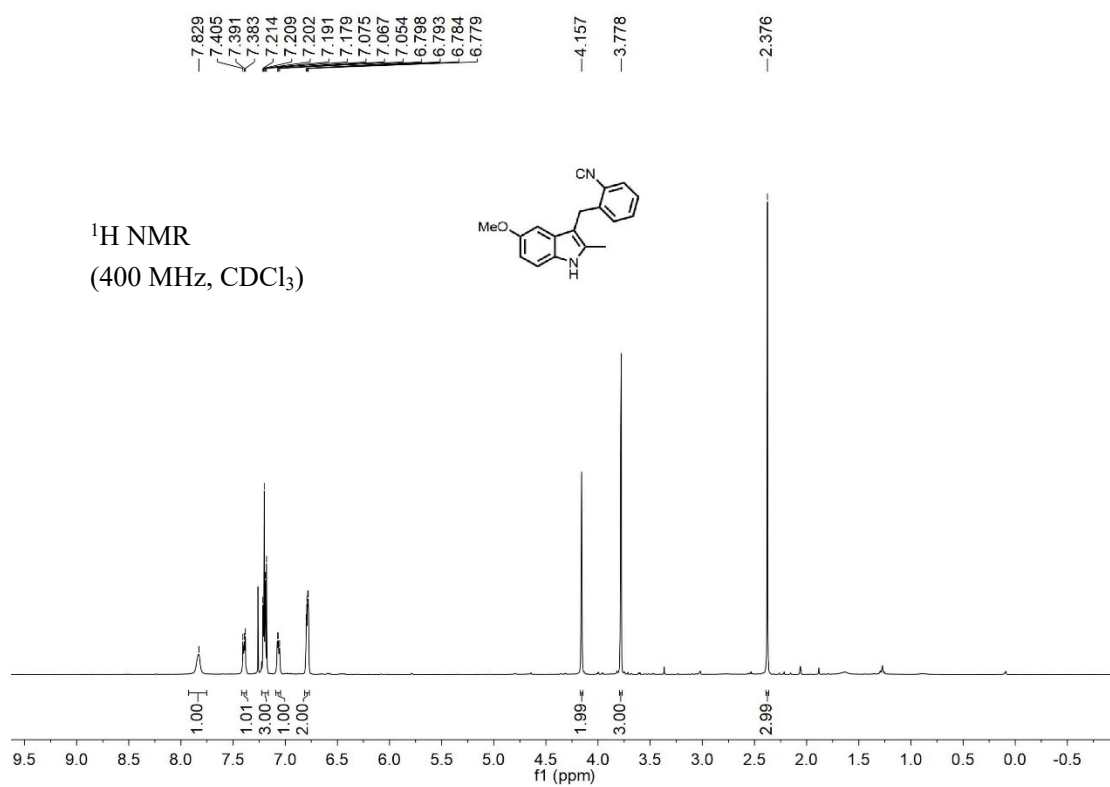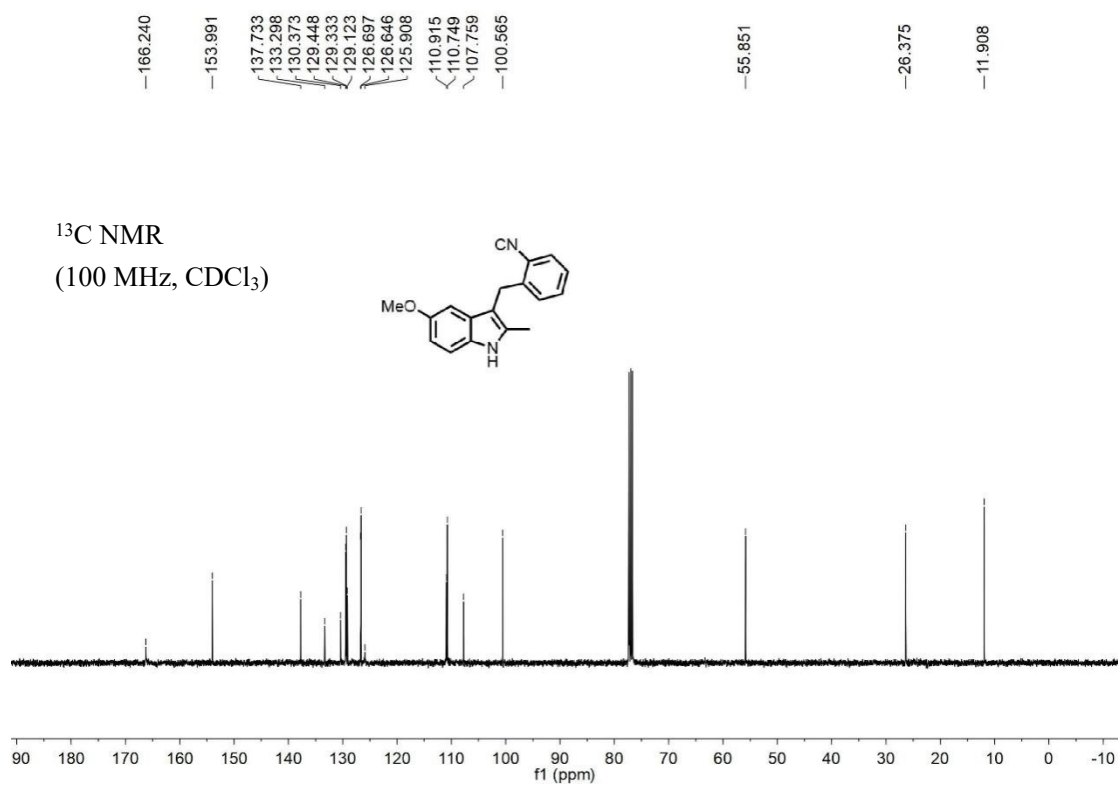

(1k)

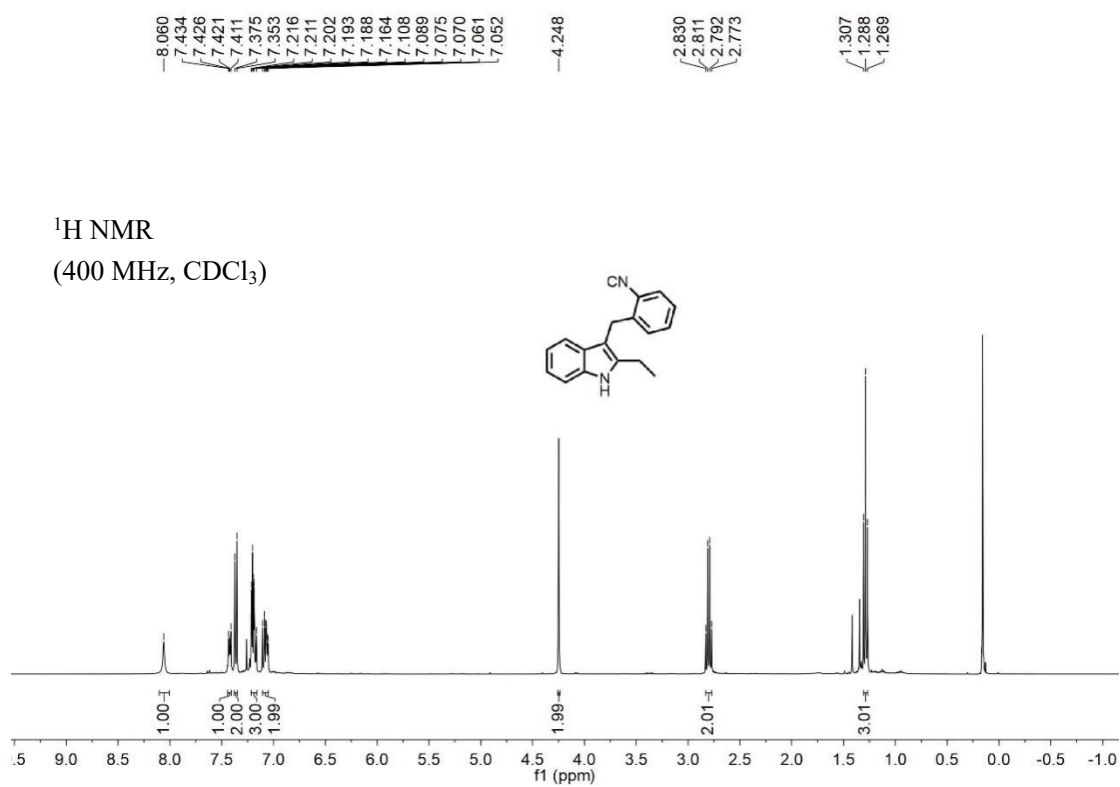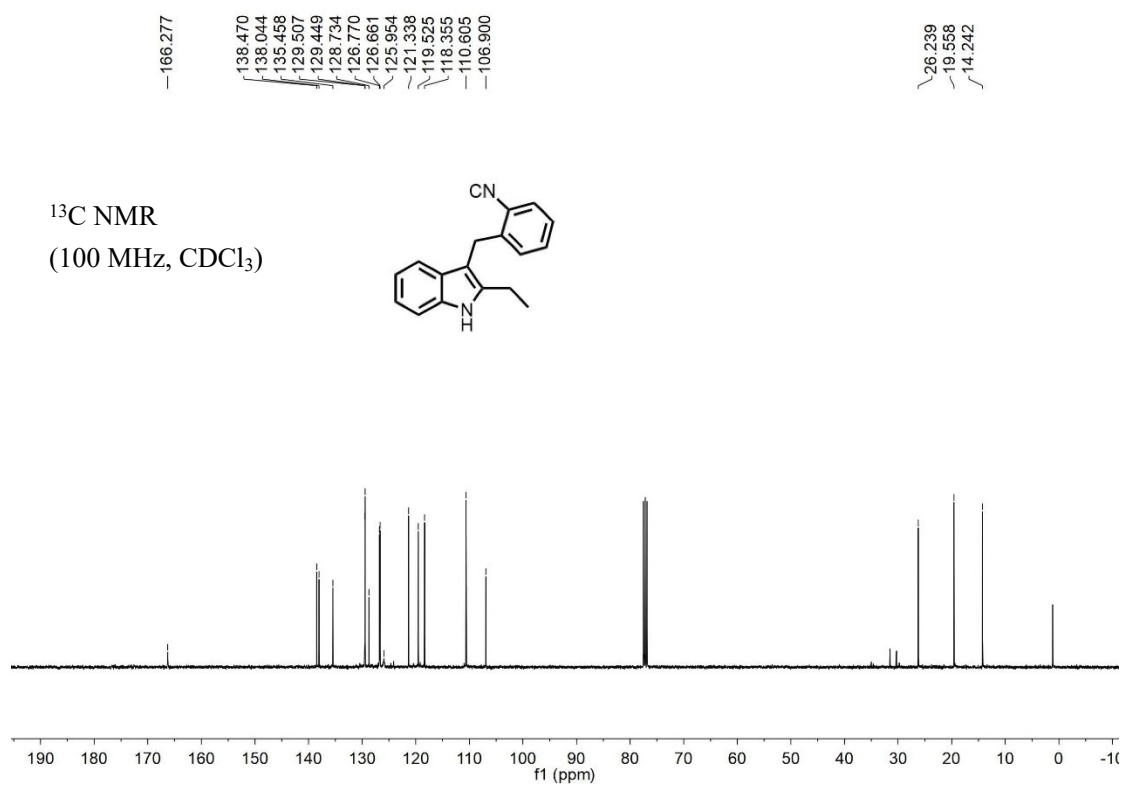

(1l)

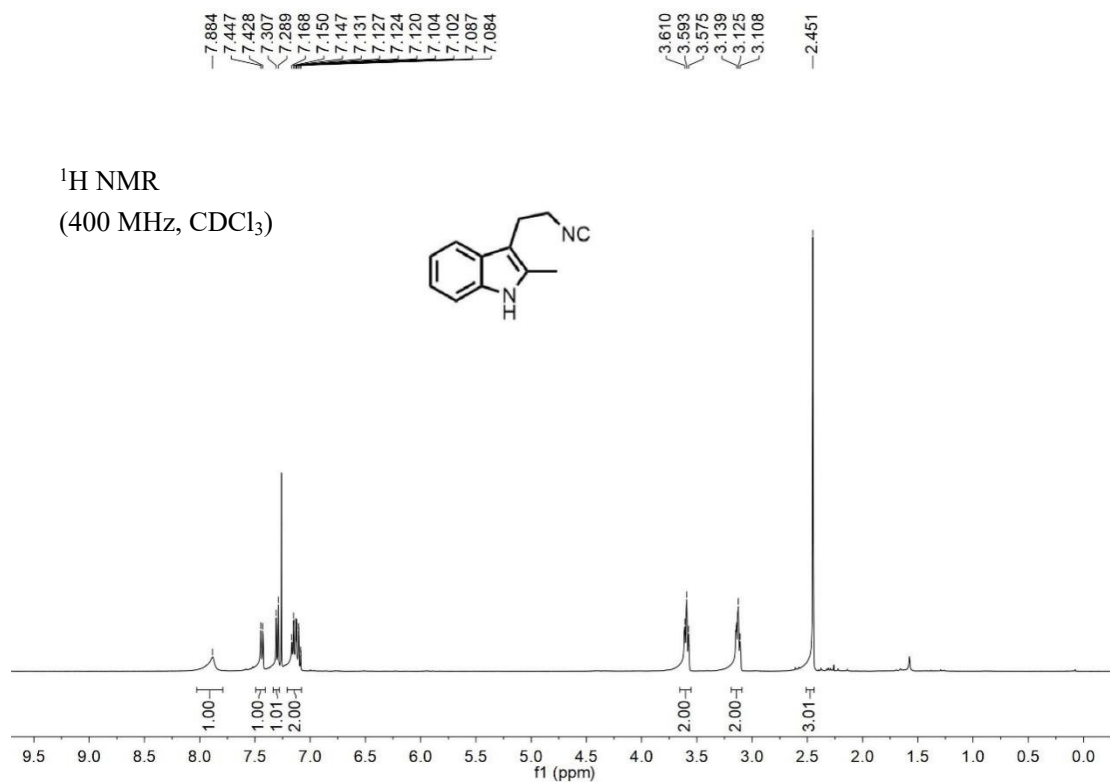

(1m)

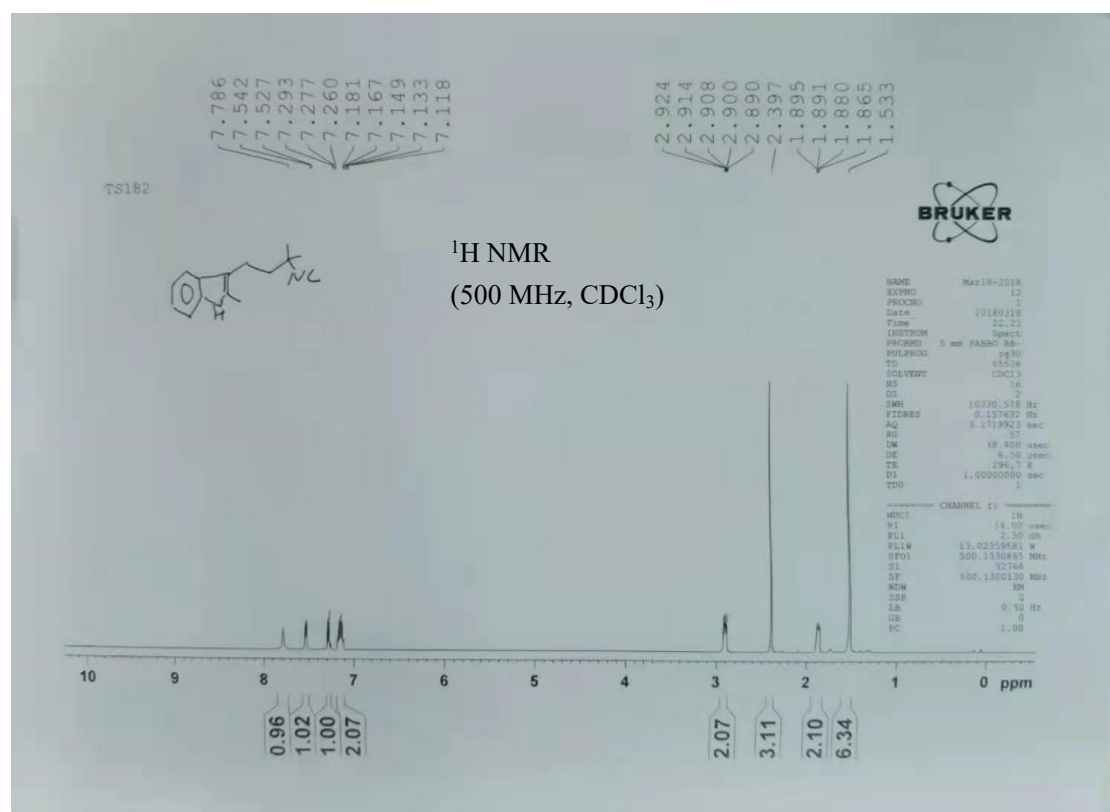



(3a)

$^1\text{H}$  NMR  
(400 MHz,  $\text{CDCl}_3$ )

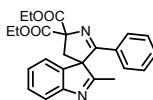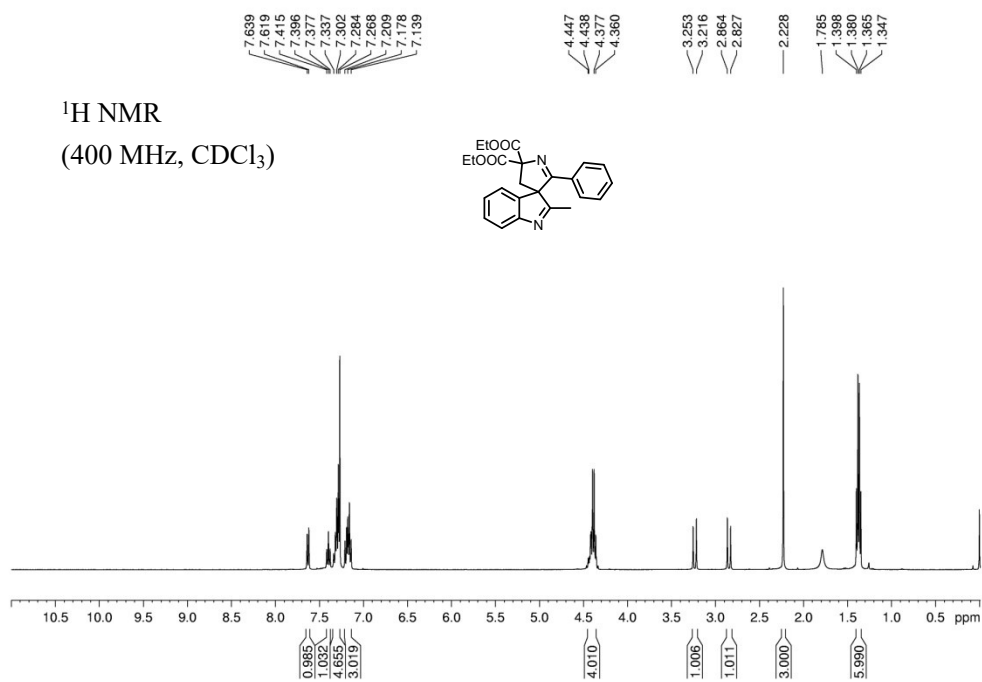

$^{13}\text{C}$  NMR  
(100 MHz,  $\text{CDCl}_3$ )

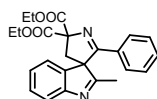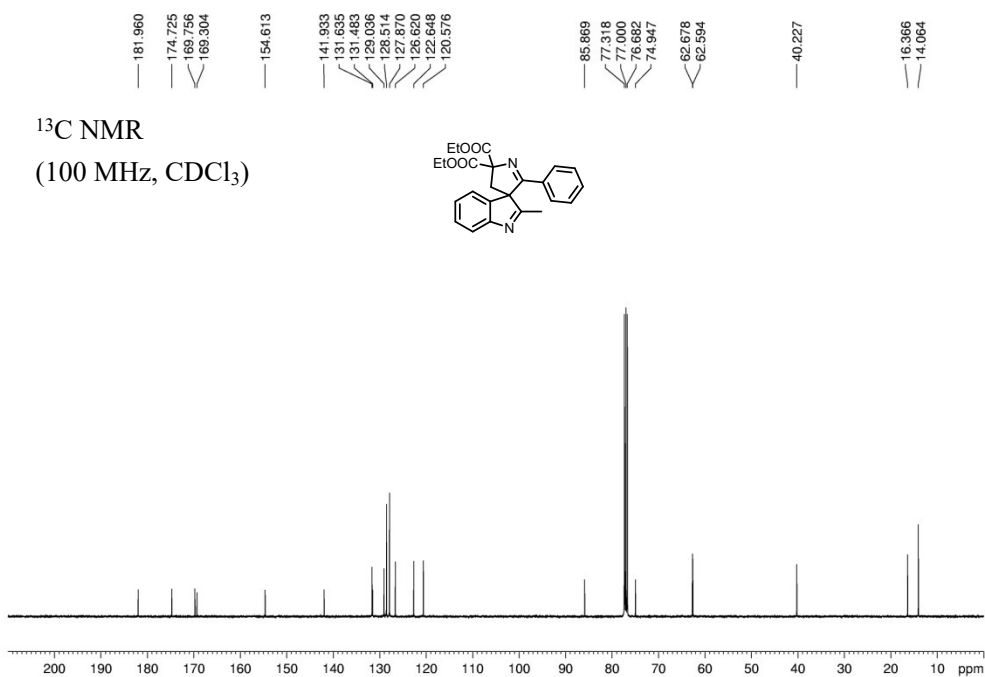

(3b)

$^1\text{H NMR}$   
(400 MHz,  $\text{CDCl}_3$ )

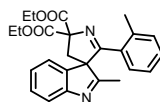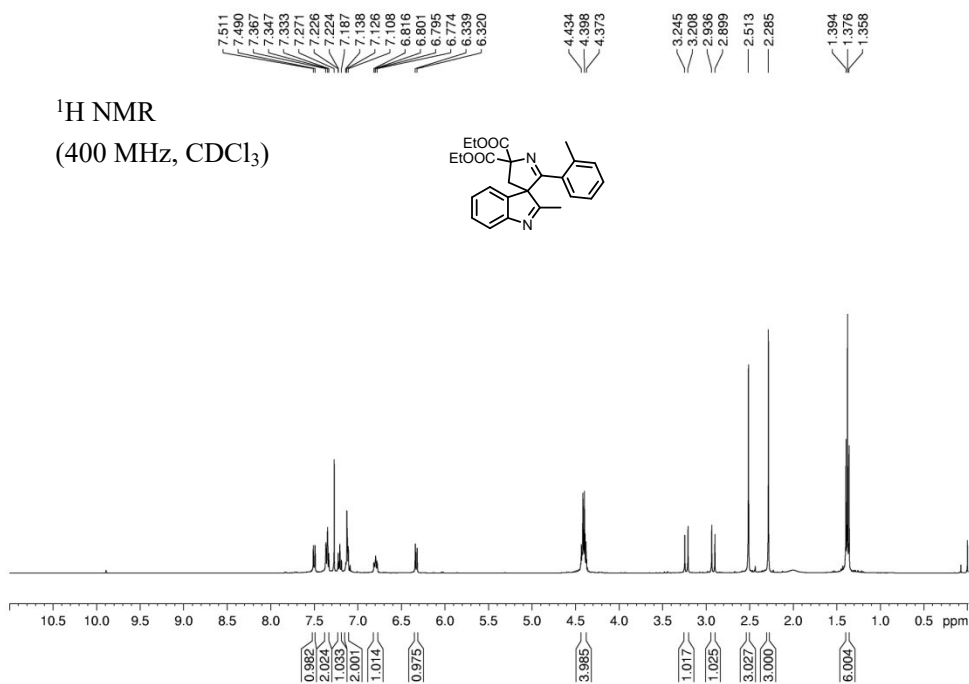

$^{13}\text{C NMR}$   
(100 MHz,  $\text{CDCl}_3$ )

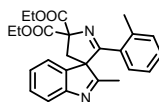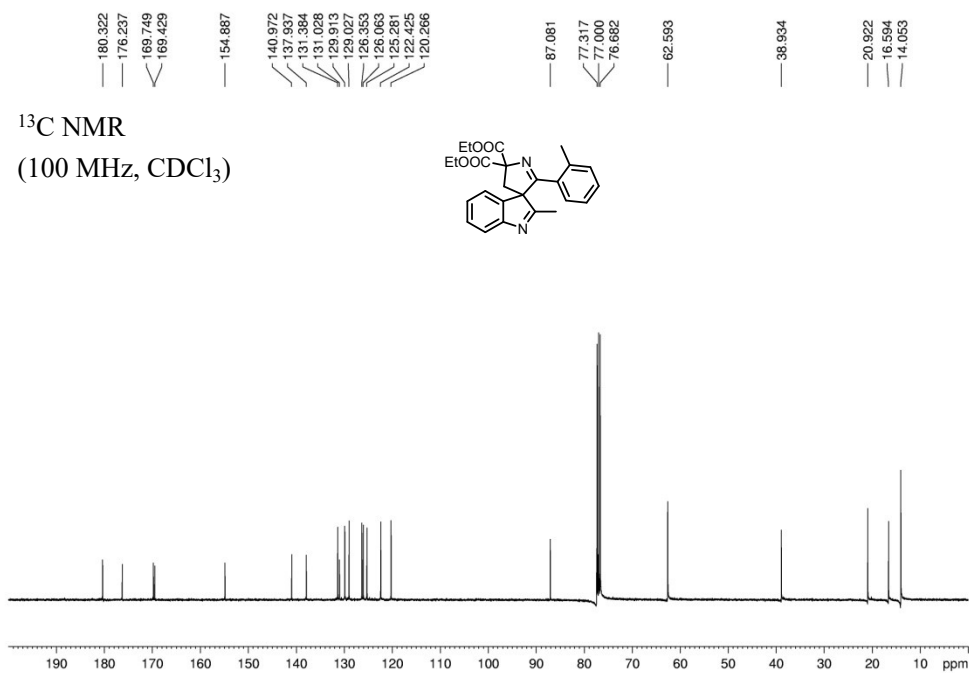

(3c)

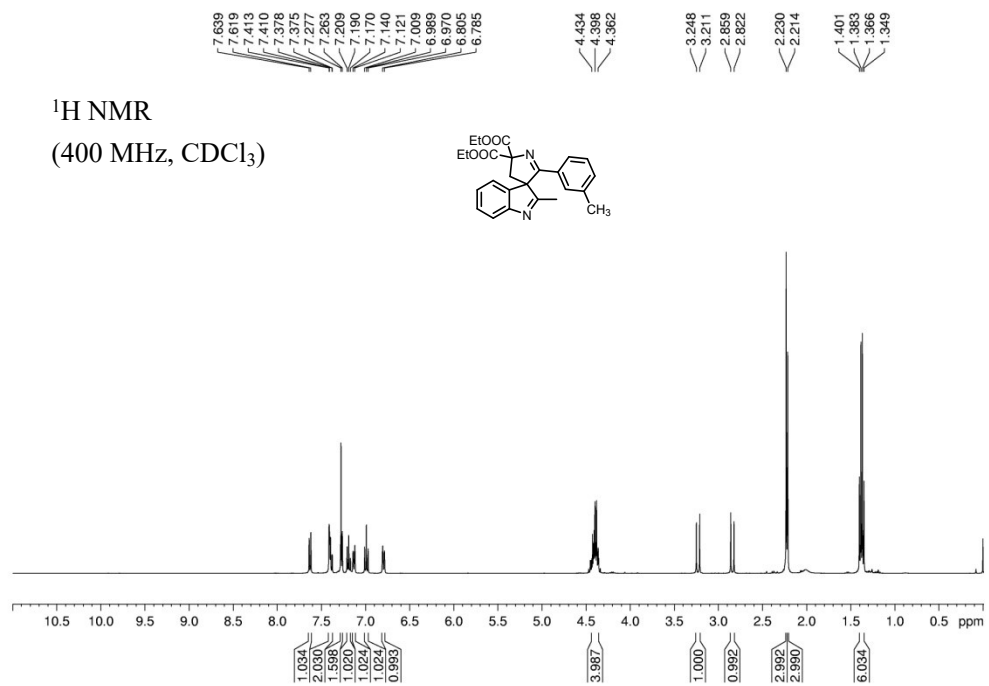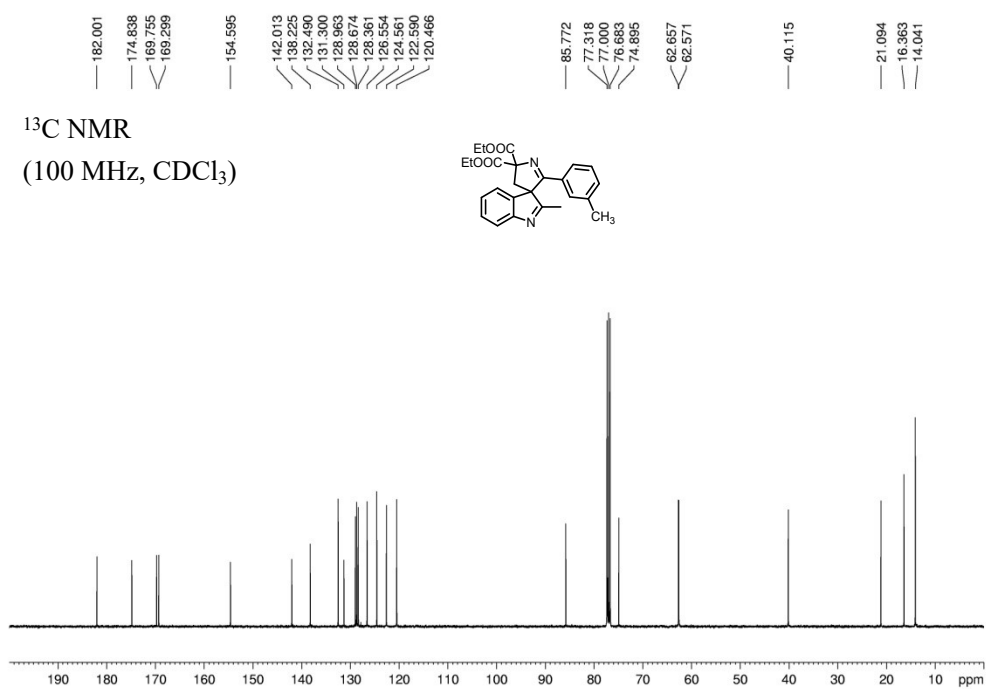

(3d)

$^1\text{H NMR}$   
(400 MHz,  $\text{CDCl}_3$ )

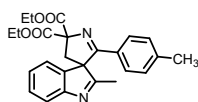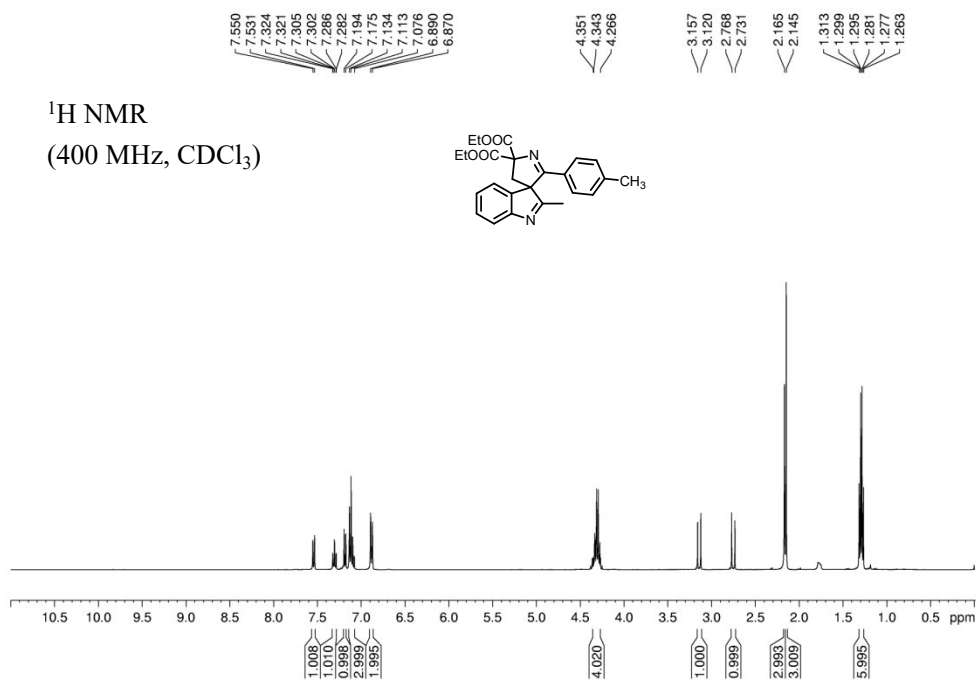

$^{13}\text{C NMR}$   
(100 MHz,  $\text{CDCl}_3$ )

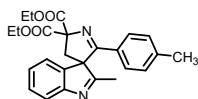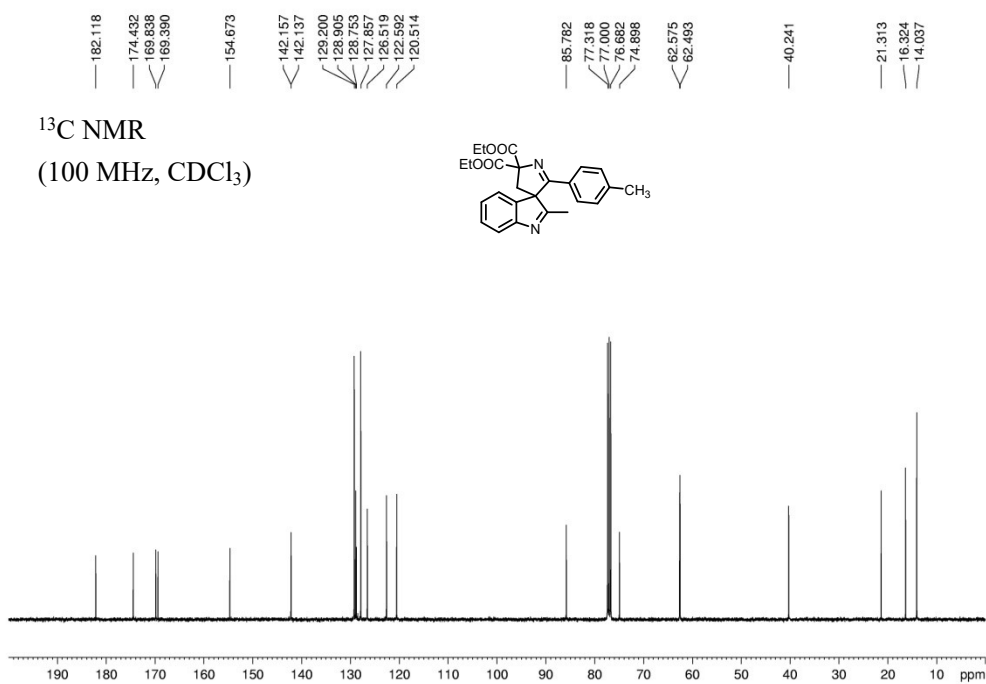

(3e)

$^1\text{H}$  NMR  
(400 MHz,  $\text{CDCl}_3$ )

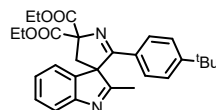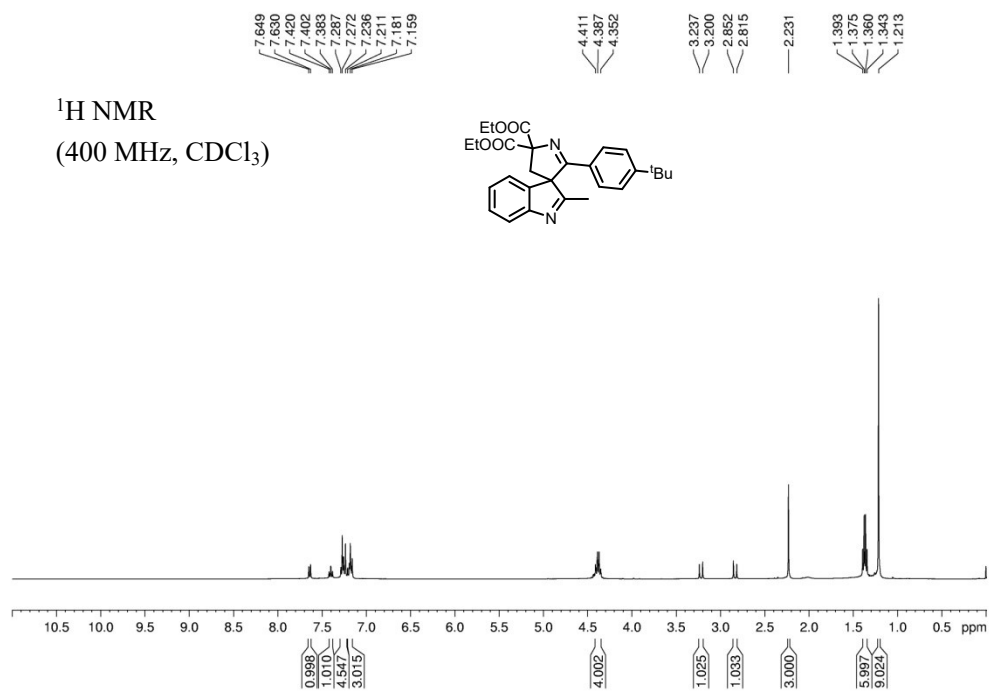

$^{13}\text{C}$  NMR  
(100 MHz,  $\text{CDCl}_3$ )

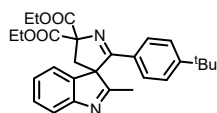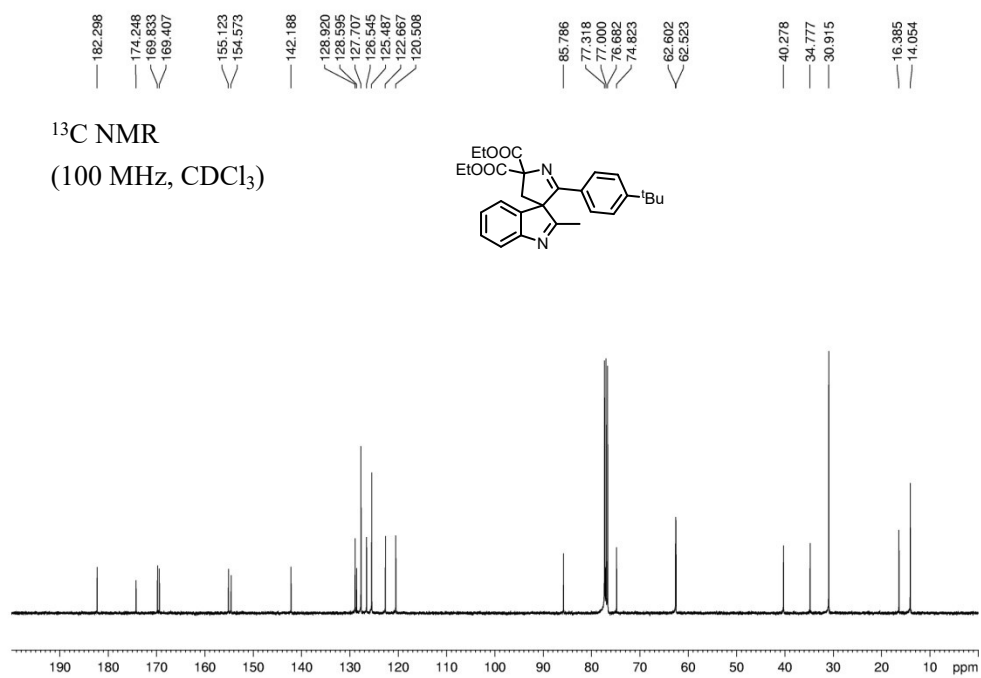

(3f)

$^1\text{H}$  NMR  
(400 MHz,  $\text{CDCl}_3$ )

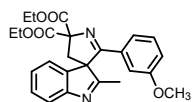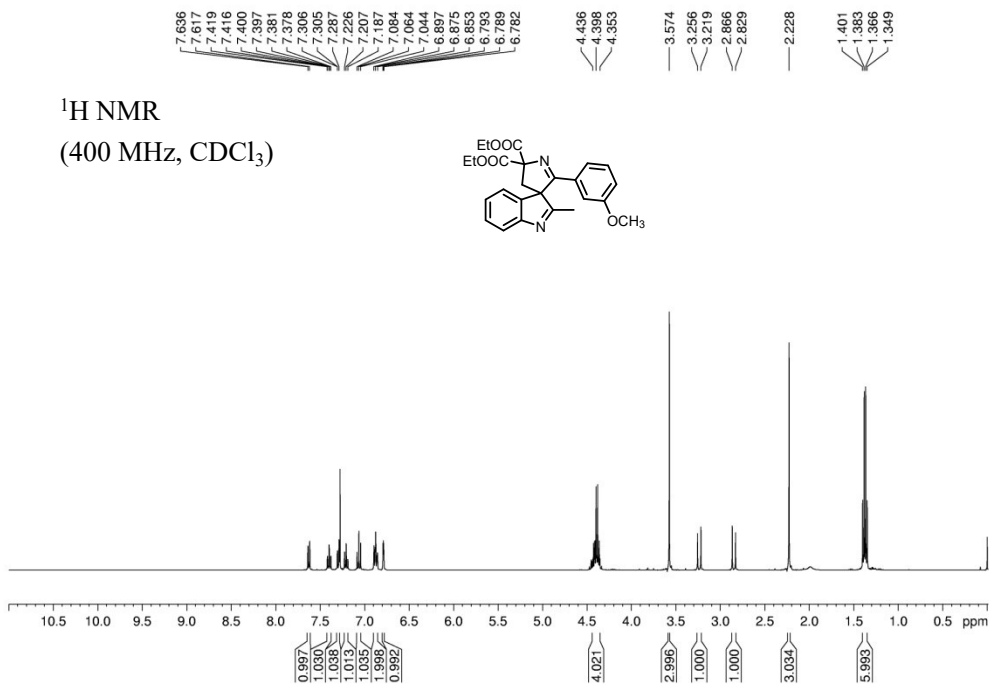

$^{13}\text{C}$  NMR  
(100 MHz,  $\text{CDCl}_3$ )

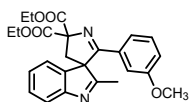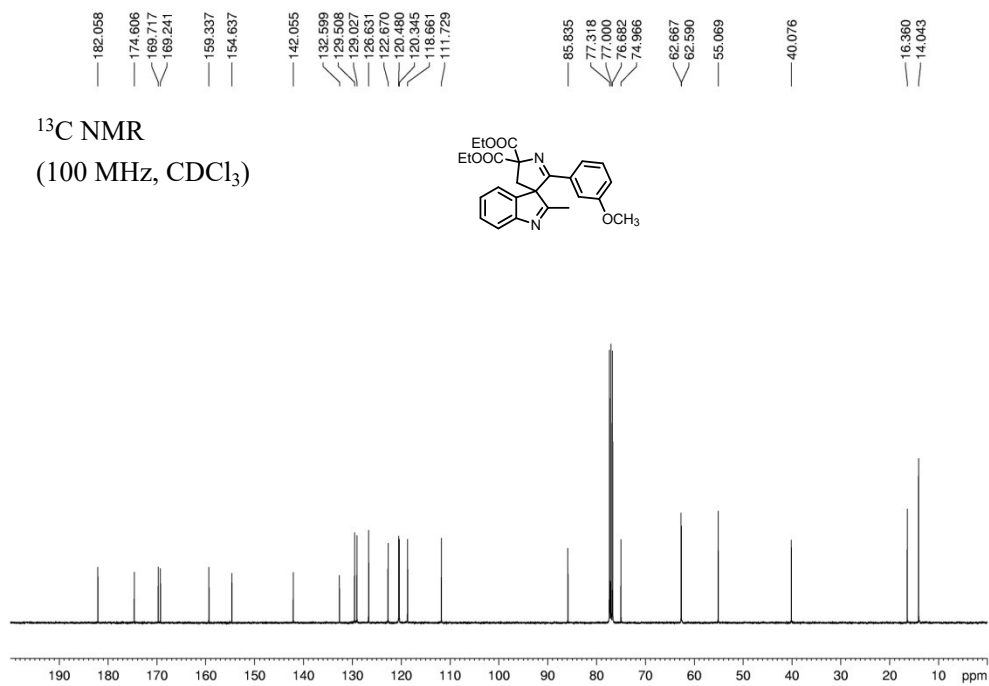

(3g)

$^1\text{H NMR}$   
(400 MHz,  $\text{CDCl}_3$ )

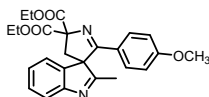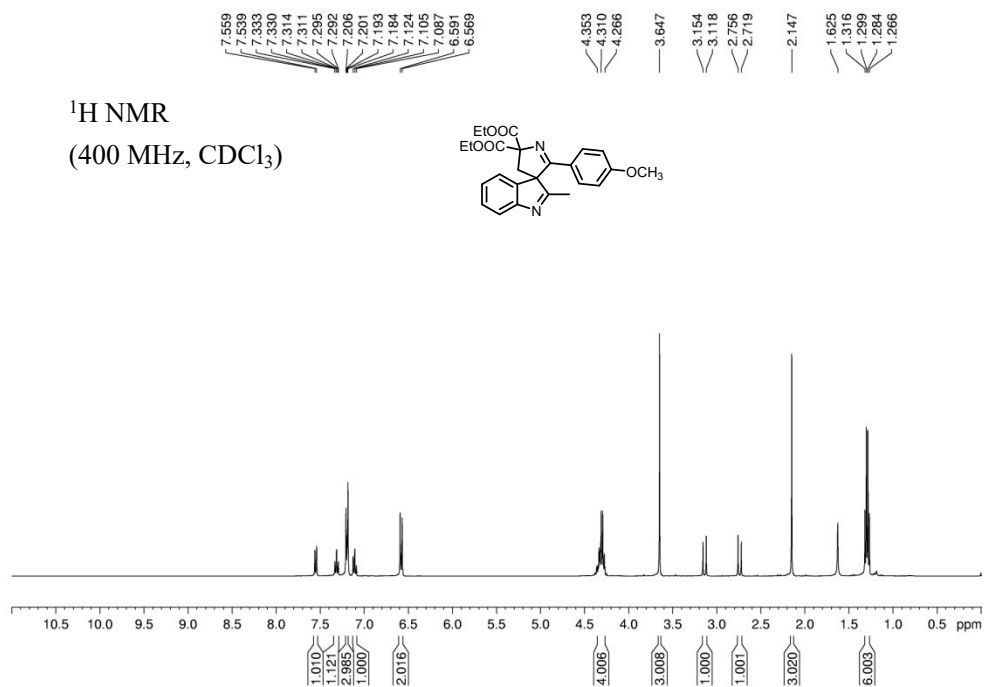

$^{13}\text{C NMR}$   
(100 MHz,  $\text{CDCl}_3$ )

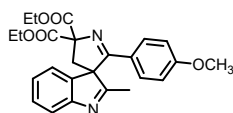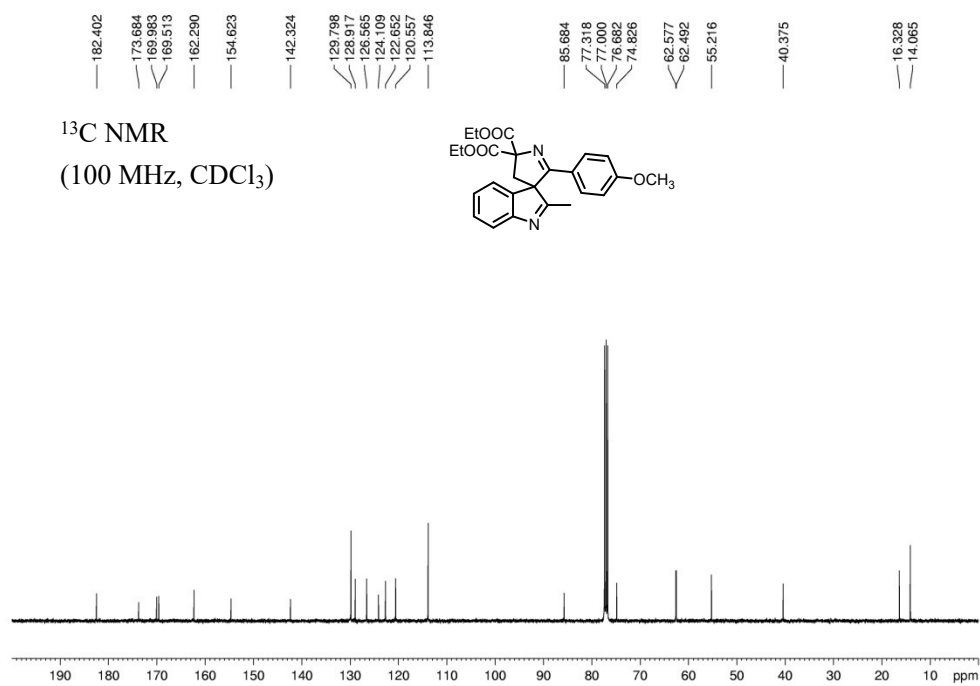

(3h)

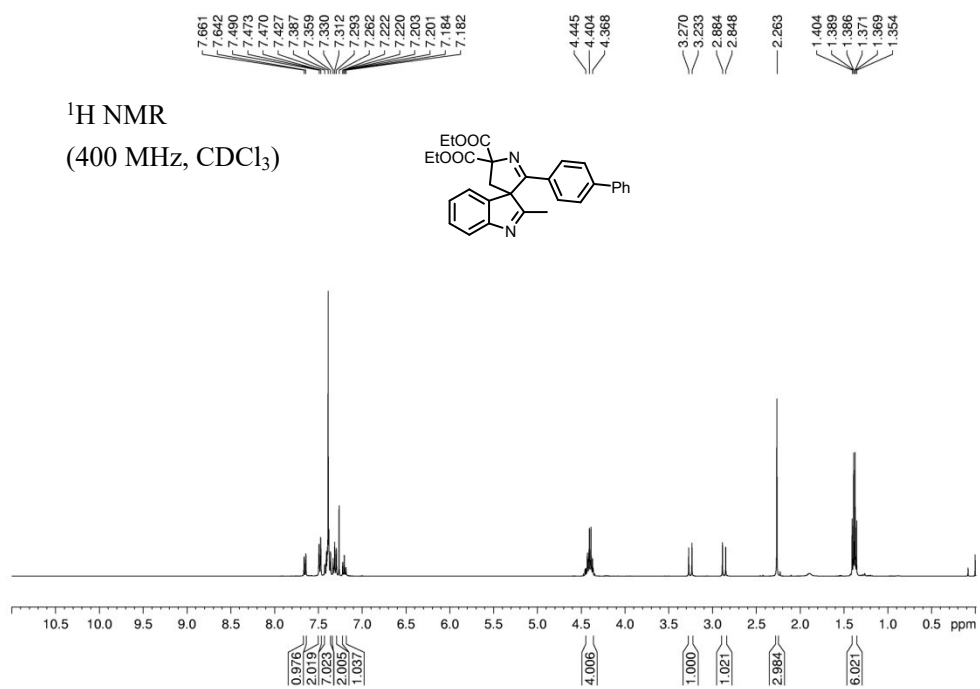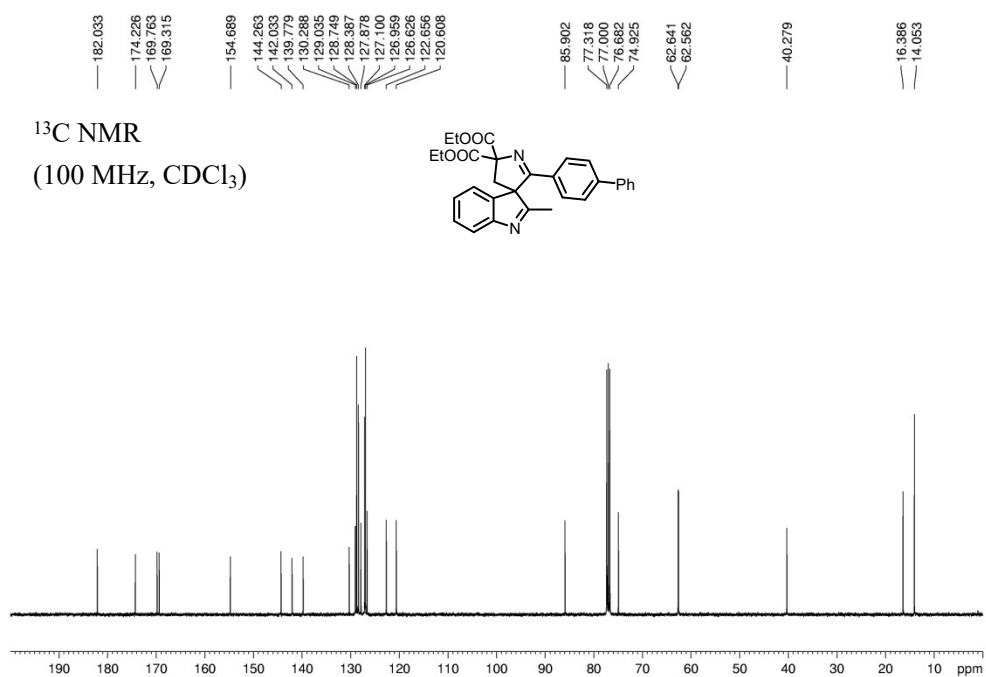



(3i)

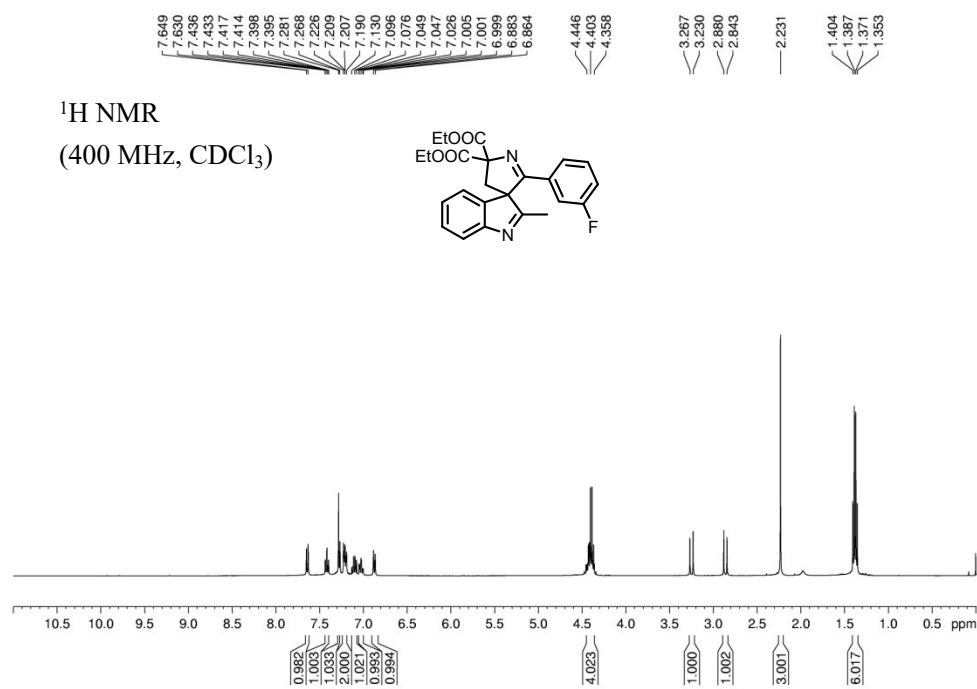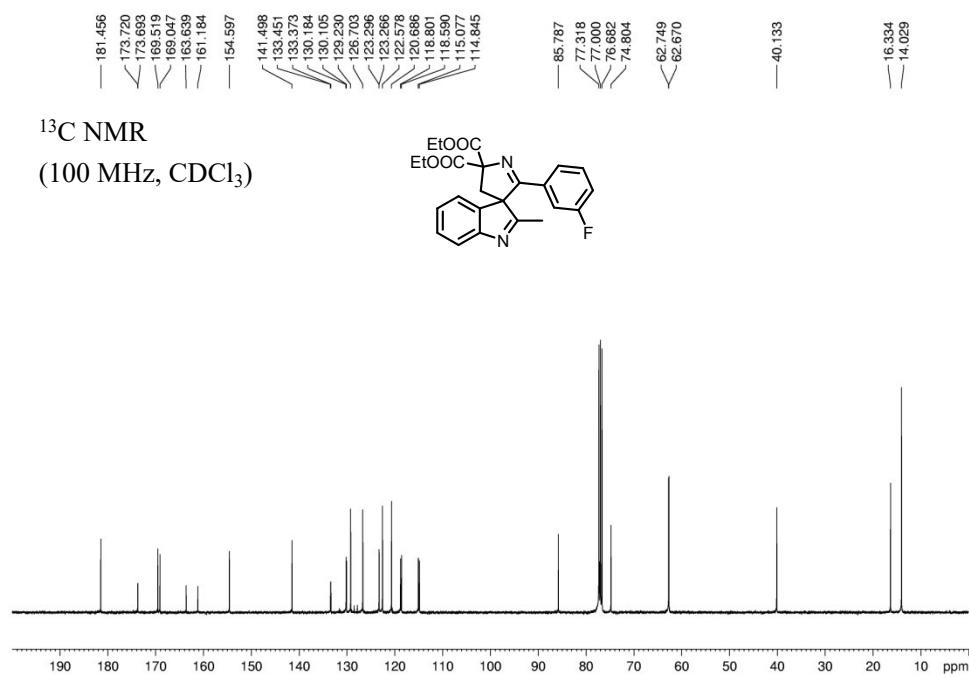

(3j)

$^1\text{H}$  NMR  
(400 MHz,  $\text{CDCl}_3$ )

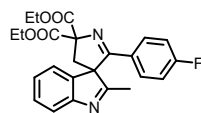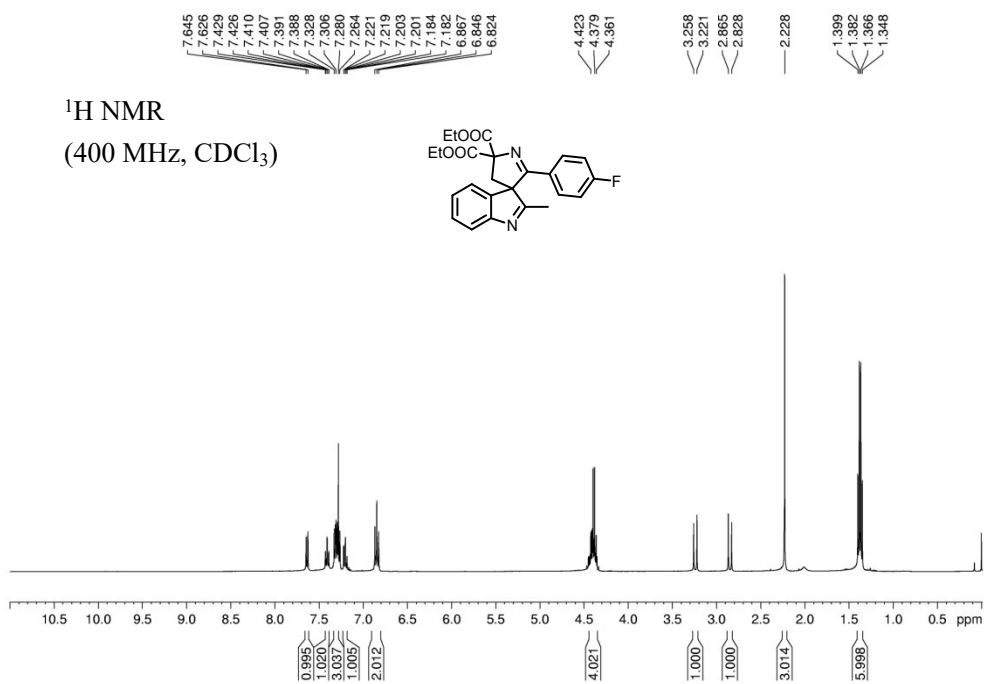

$^{13}\text{C}$  NMR  
(100 MHz,  $\text{CDCl}_3$ )

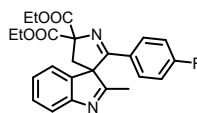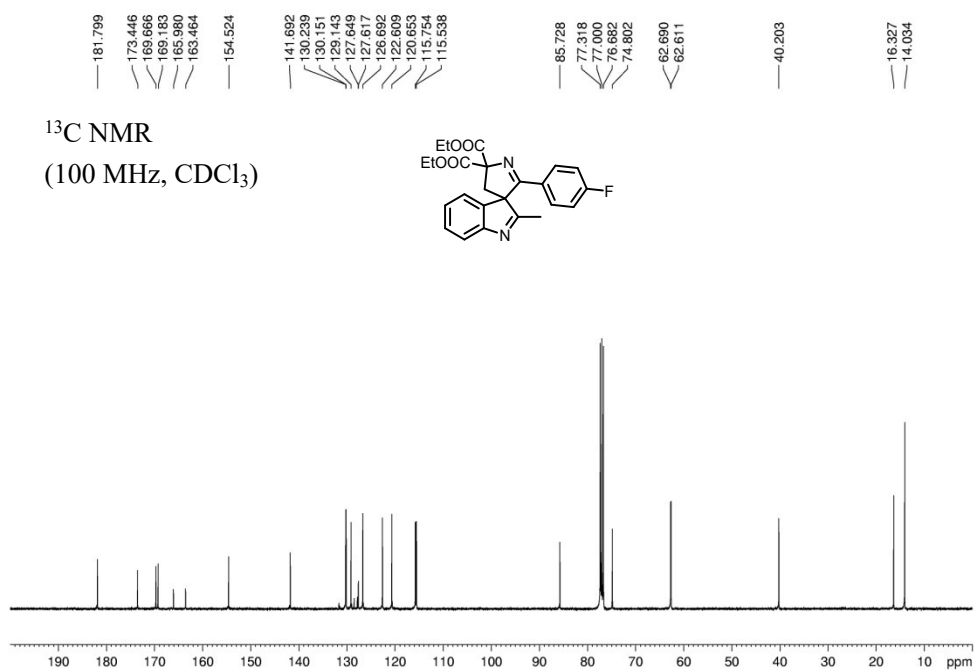

(3k)

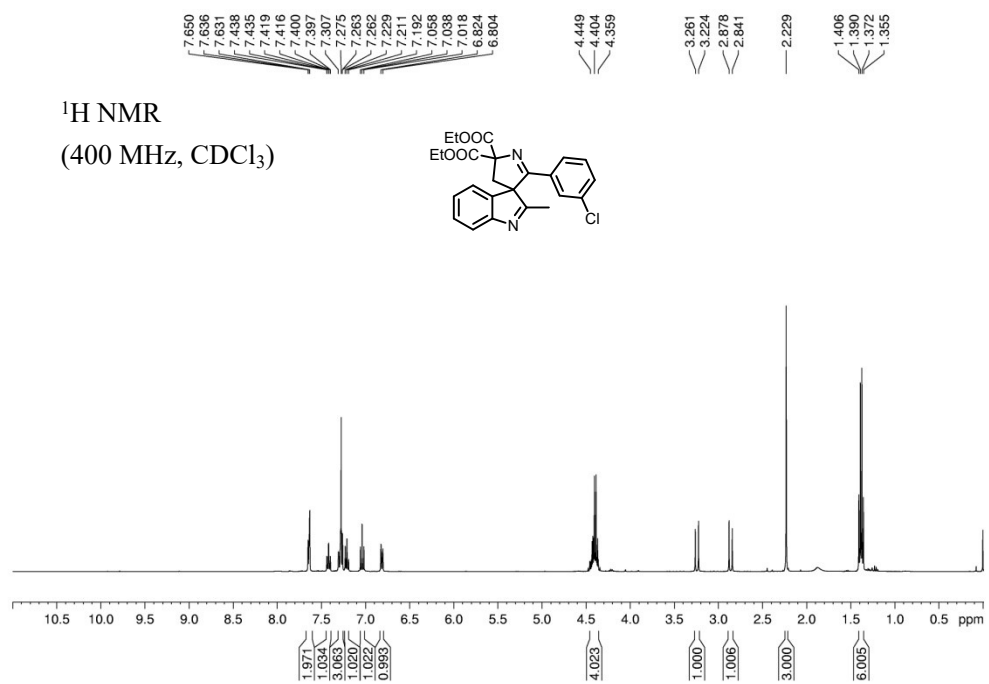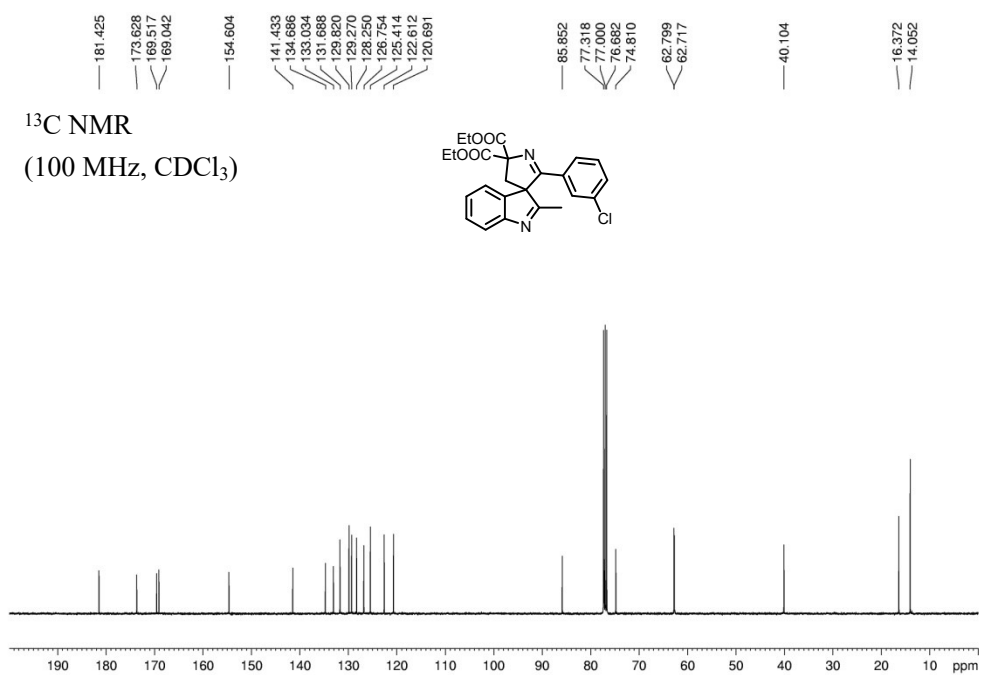

(3)

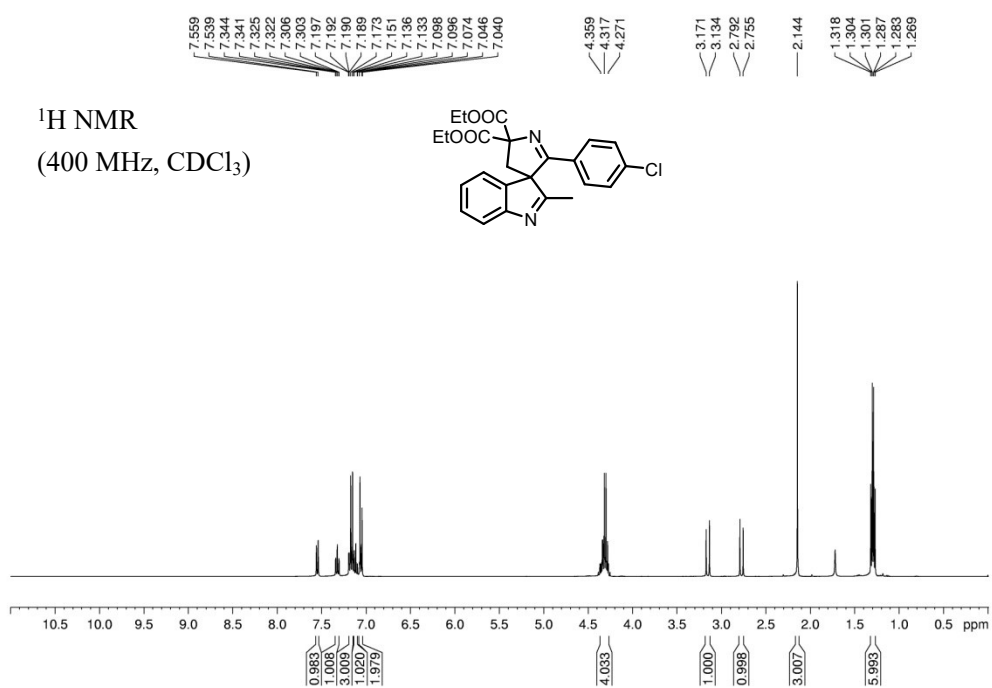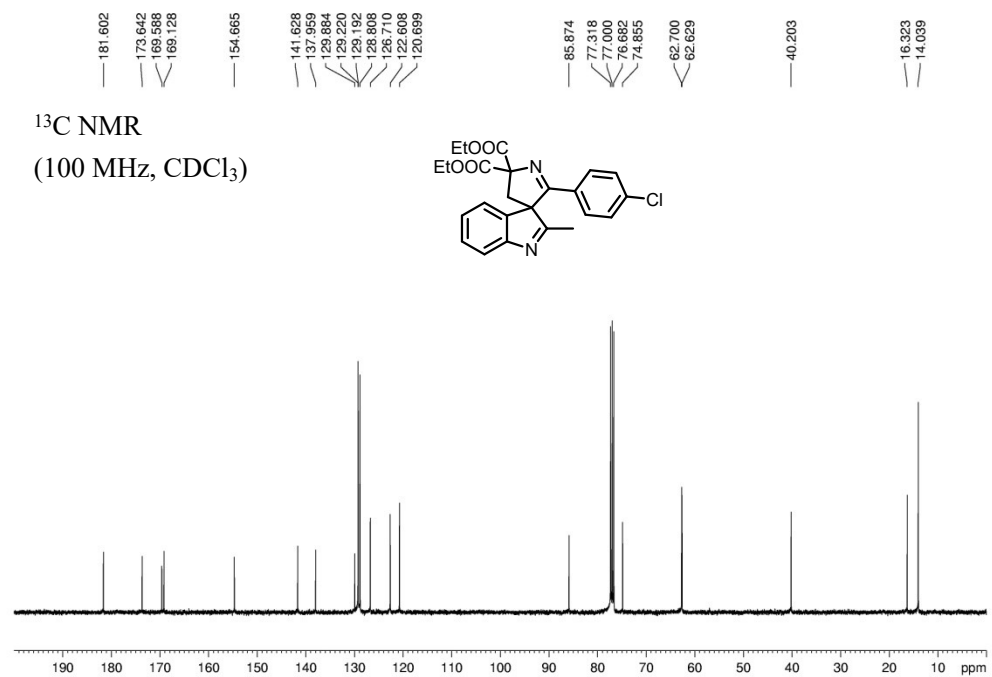

(3m)

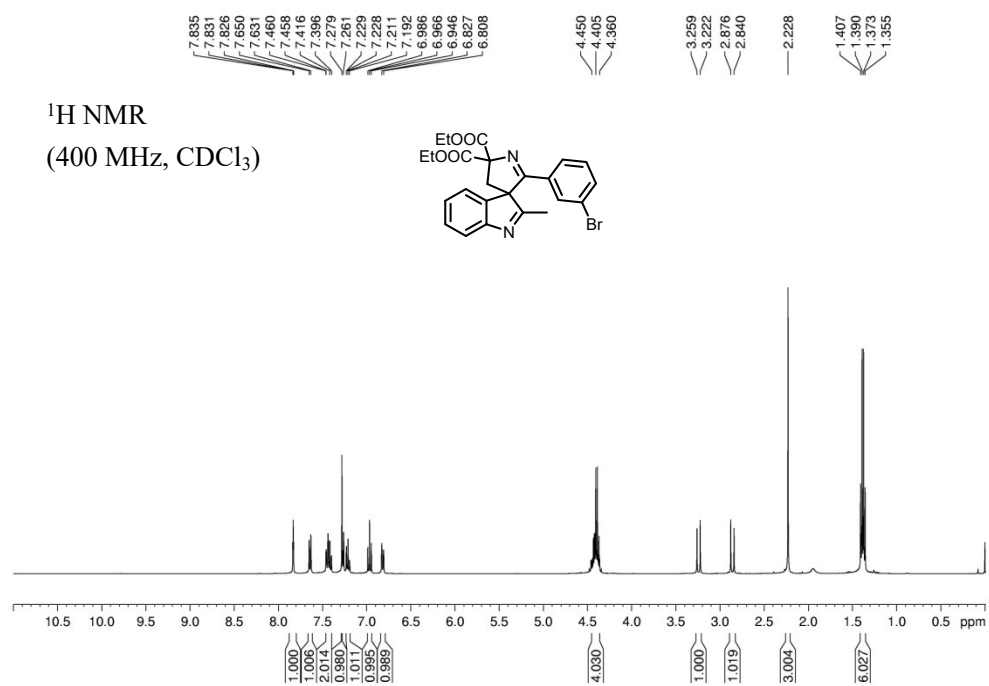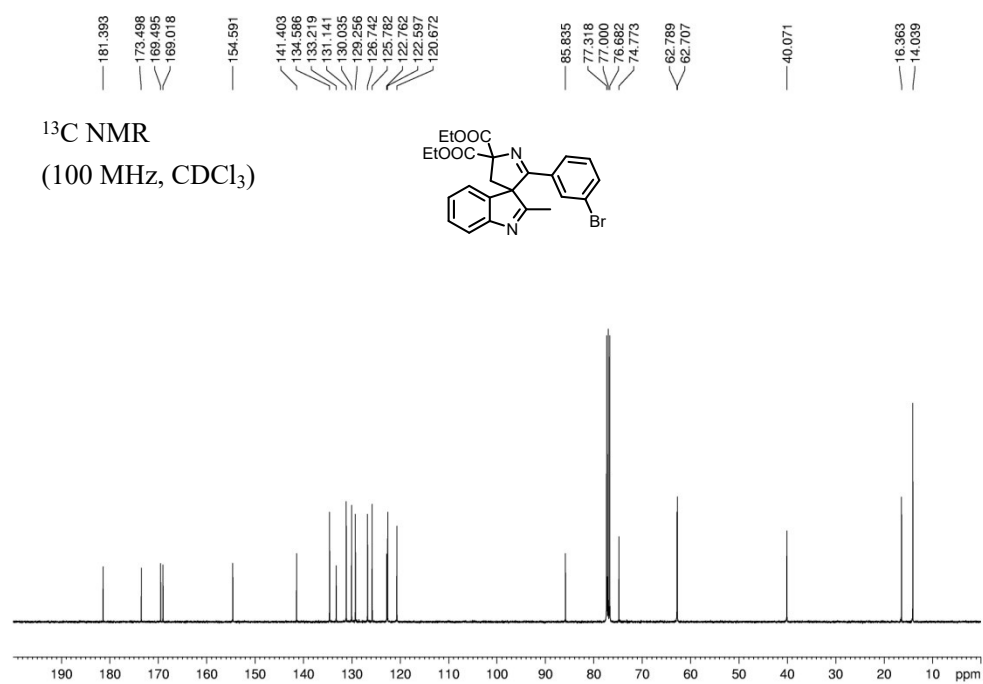

**(3n)**

<sup>1</sup>H NMR  
(400 MHz, CDCl<sub>3</sub>)

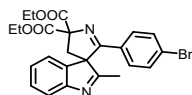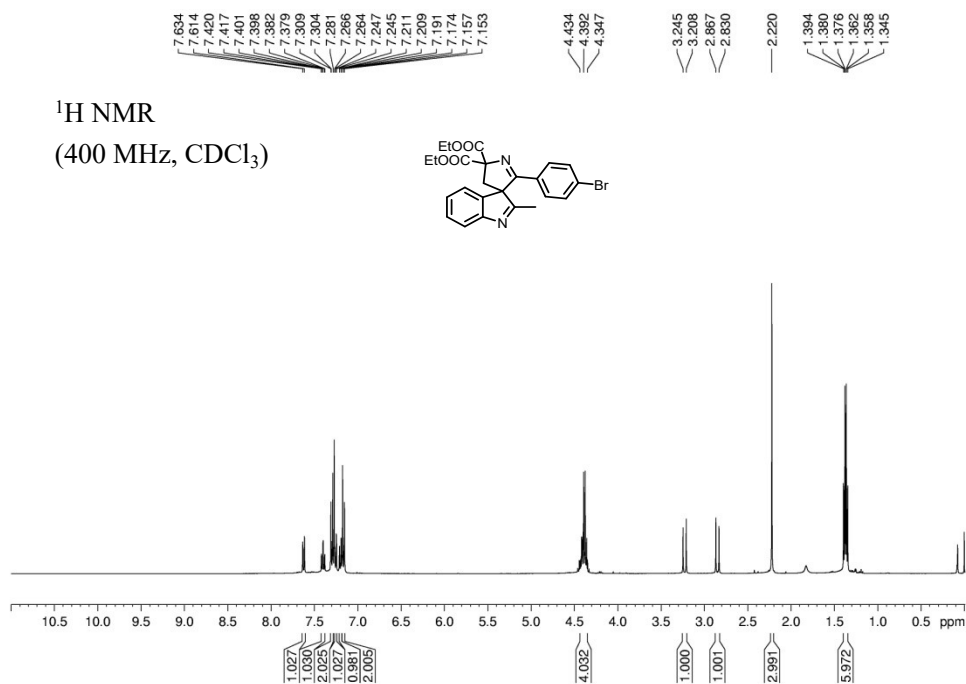

<sup>13</sup>C NMR  
(100 MHz, CDCl<sub>3</sub>)

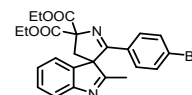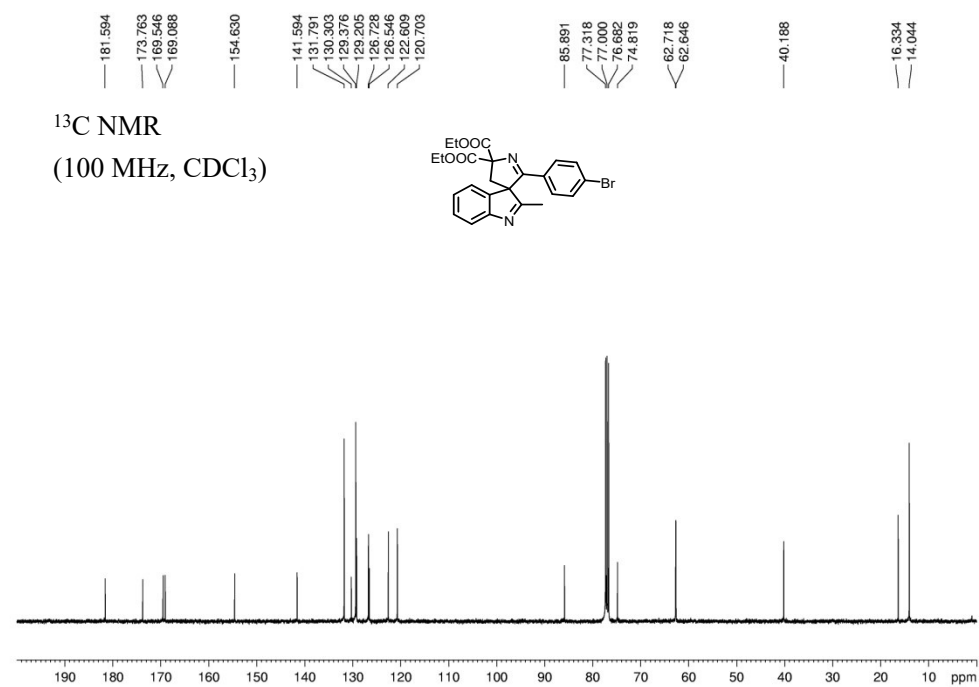

(30)

$^1\text{H NMR}$   
(400 MHz,  $\text{CDCl}_3$ )

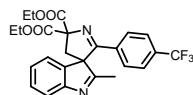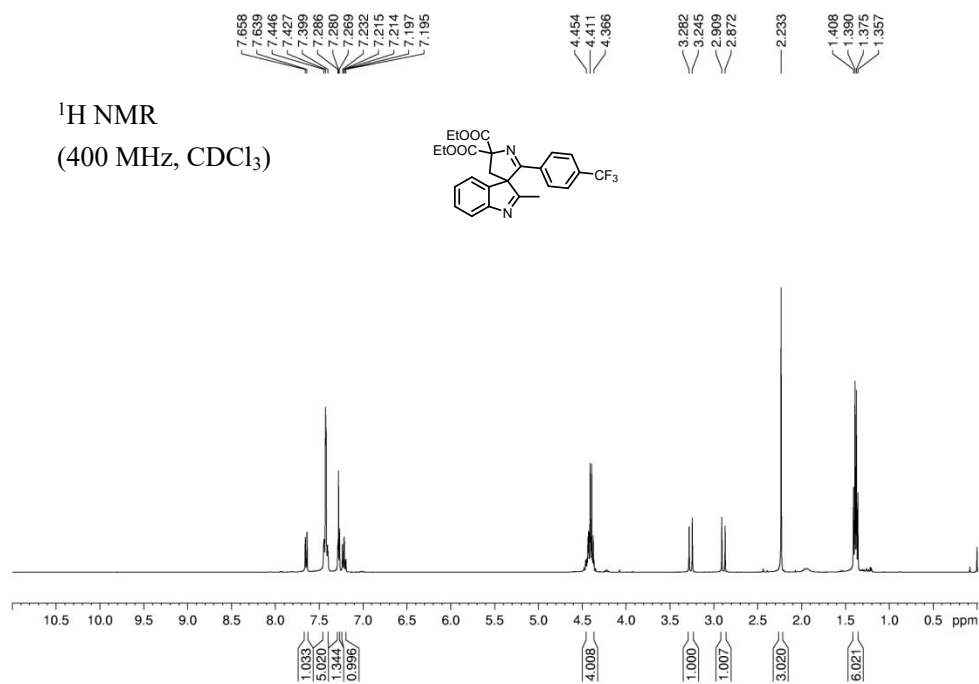

$^{13}\text{C NMR}$   
(100 MHz,  $\text{CDCl}_3$ )

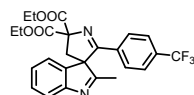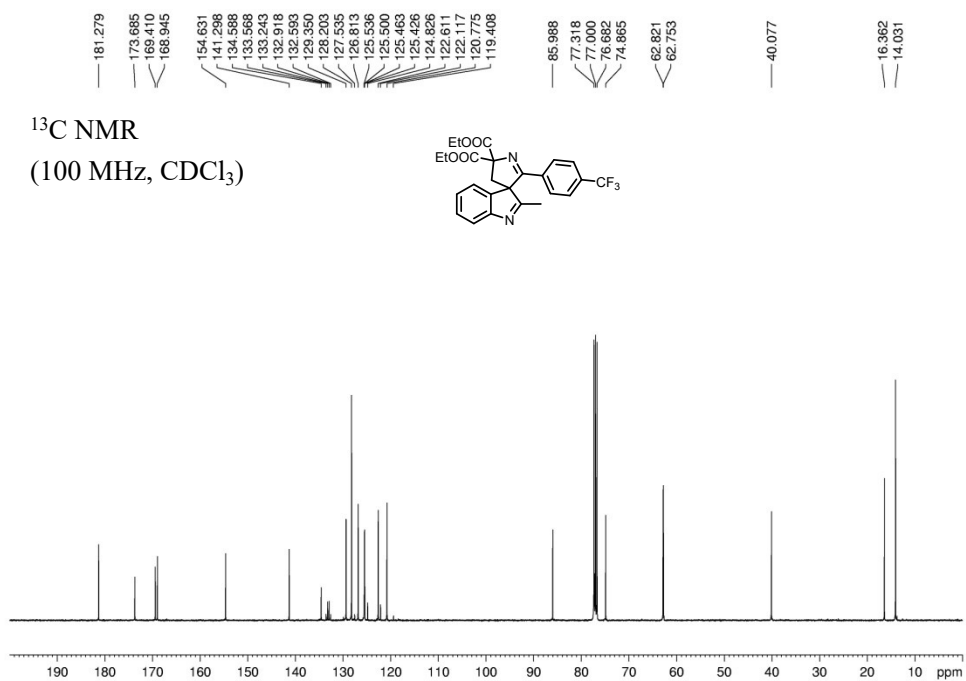

(3p)

$^1\text{H}$  NMR  
(400 MHz,  $\text{CDCl}_3$ )

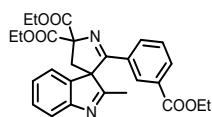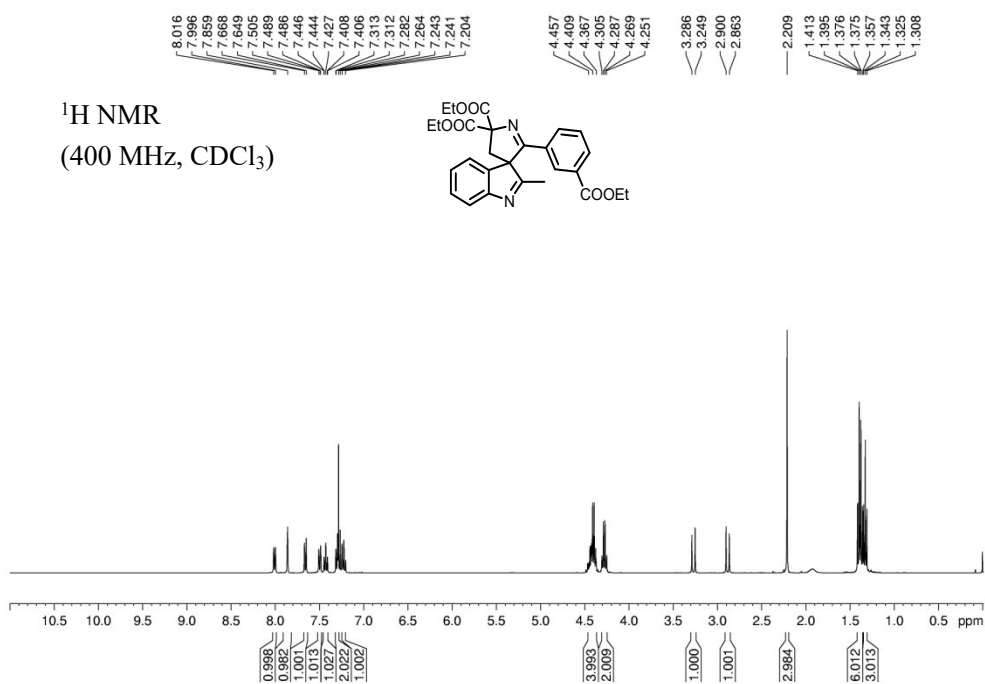

$^{13}\text{C}$  NMR  
(100 MHz,  $\text{CDCl}_3$ )

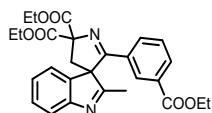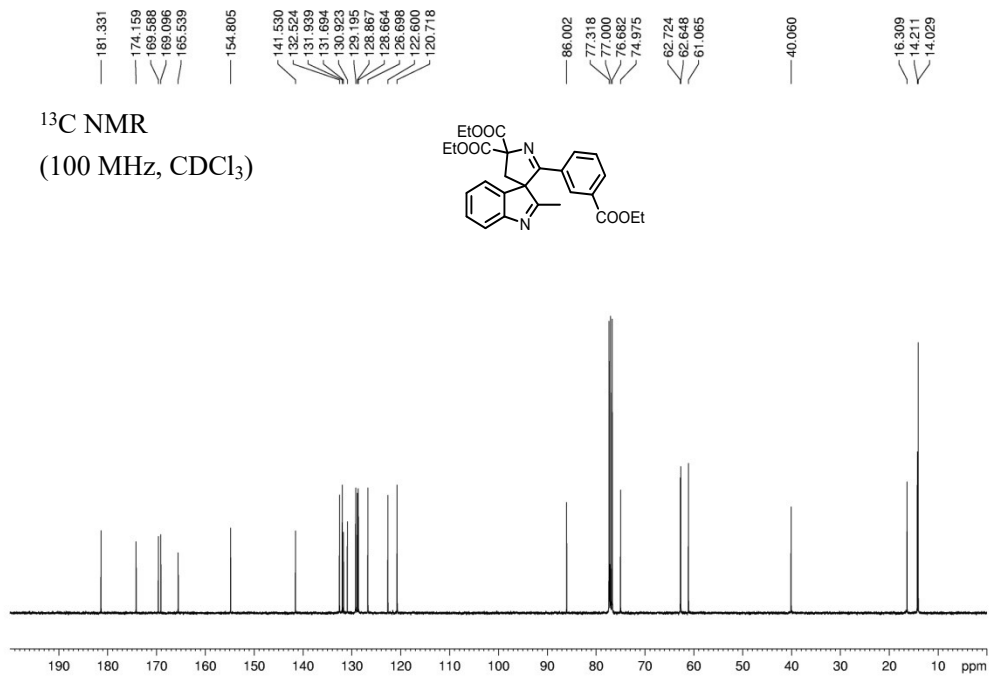



(3q)

$^1\text{H}$  NMR  
(400 MHz,  $\text{CDCl}_3$ )

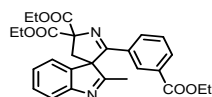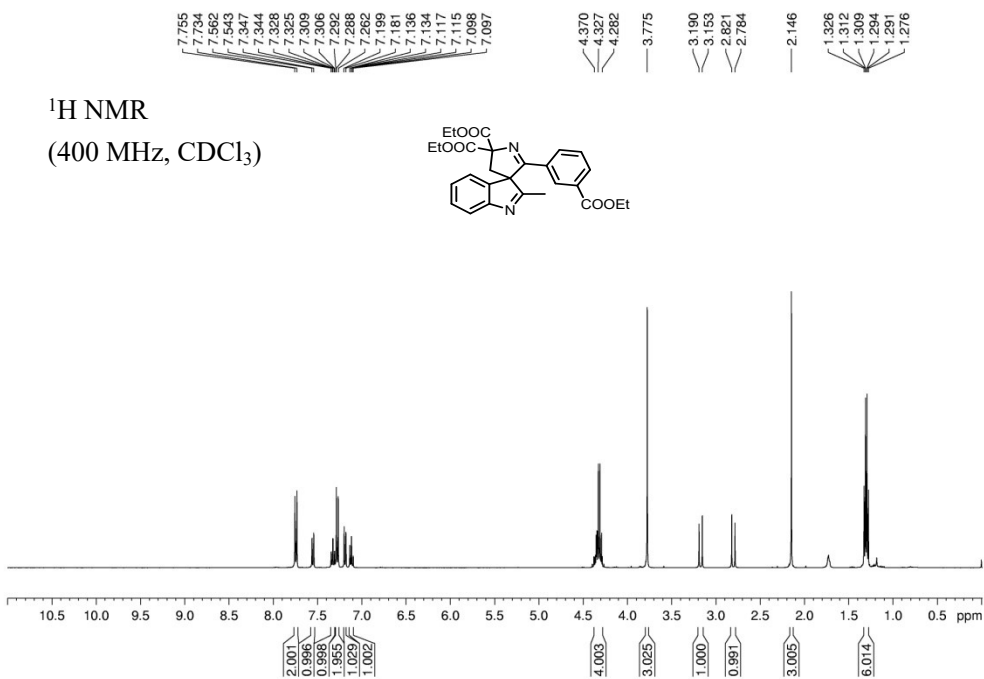

$^{13}\text{C}$  NMR  
(100 MHz,  $\text{CDCl}_3$ )

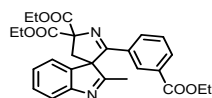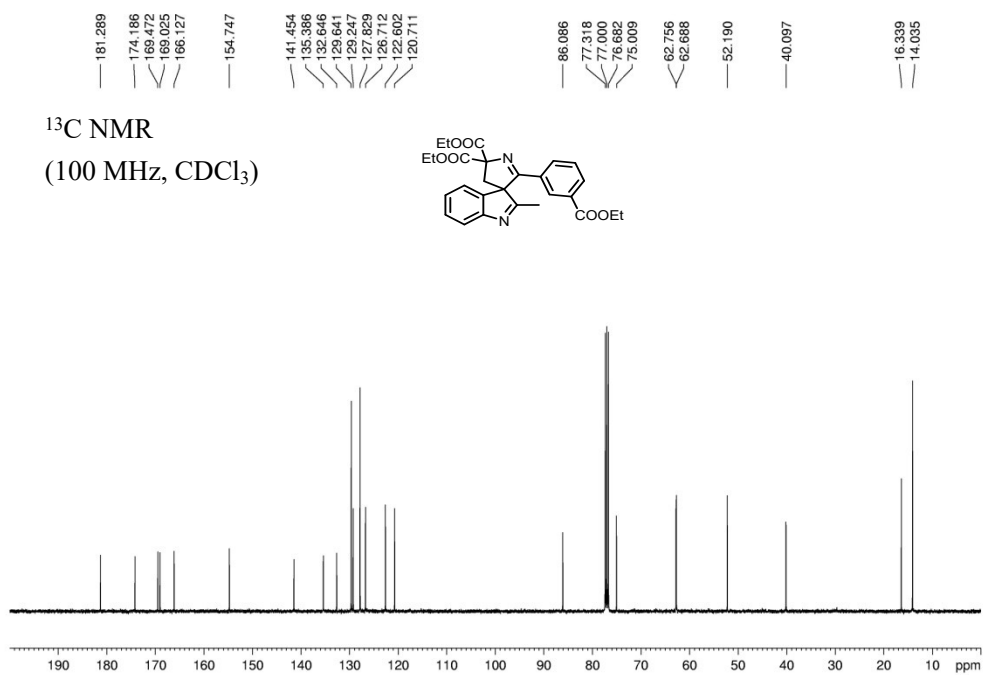

(3r)

$^1\text{H}$  NMR  
(400 MHz,  $\text{CDCl}_3$ )

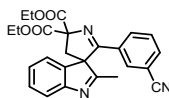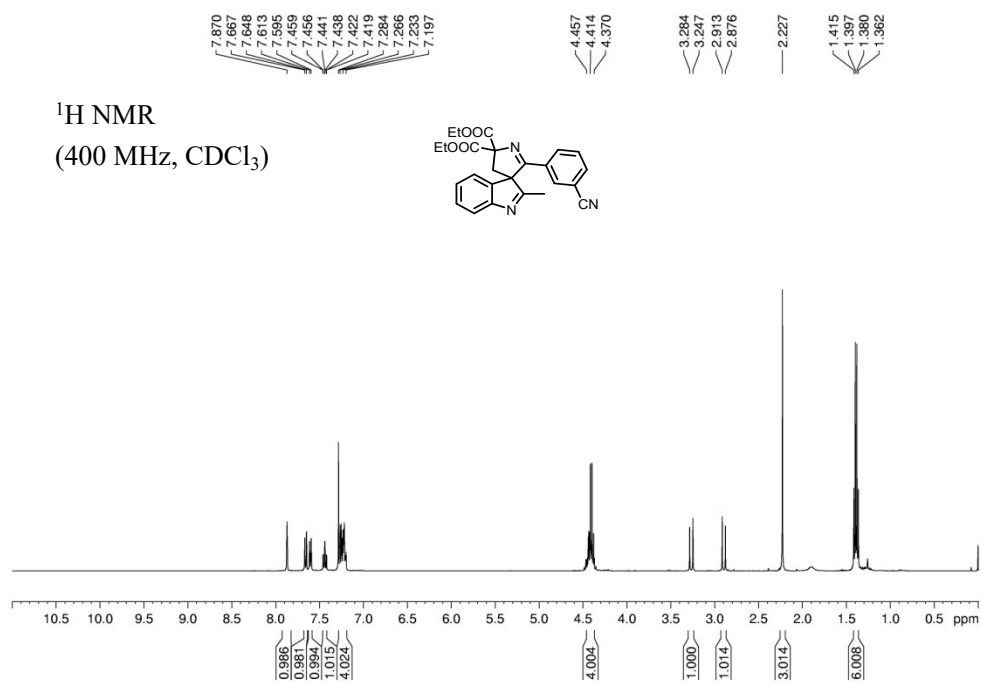

$^{13}\text{C}$  NMR  
(100 MHz,  $\text{CDCl}_3$ )

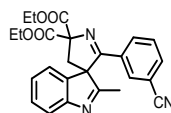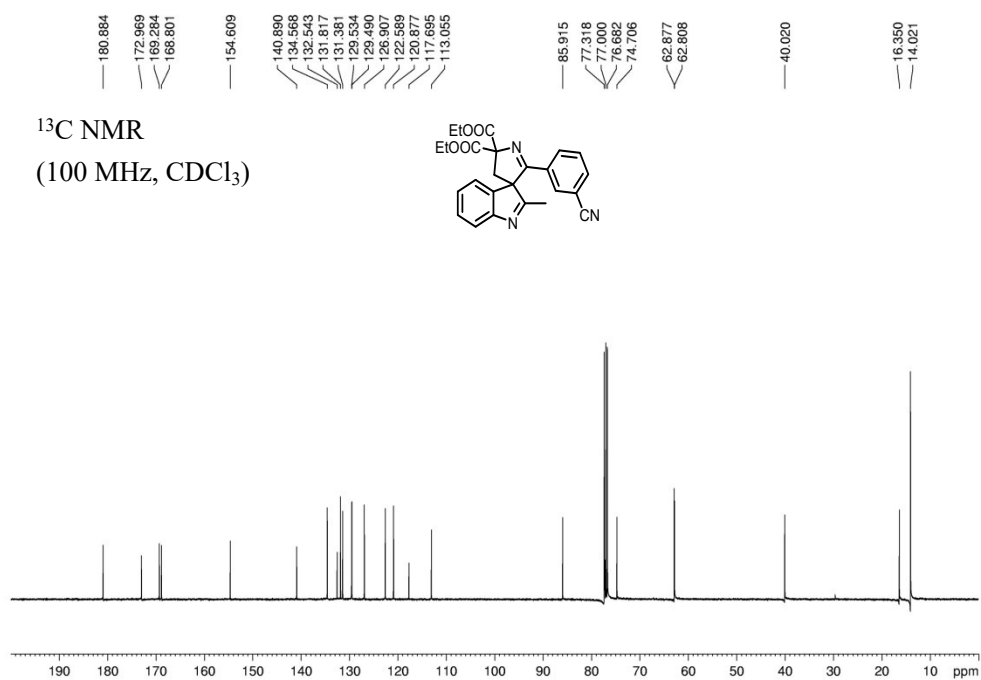

(3s)

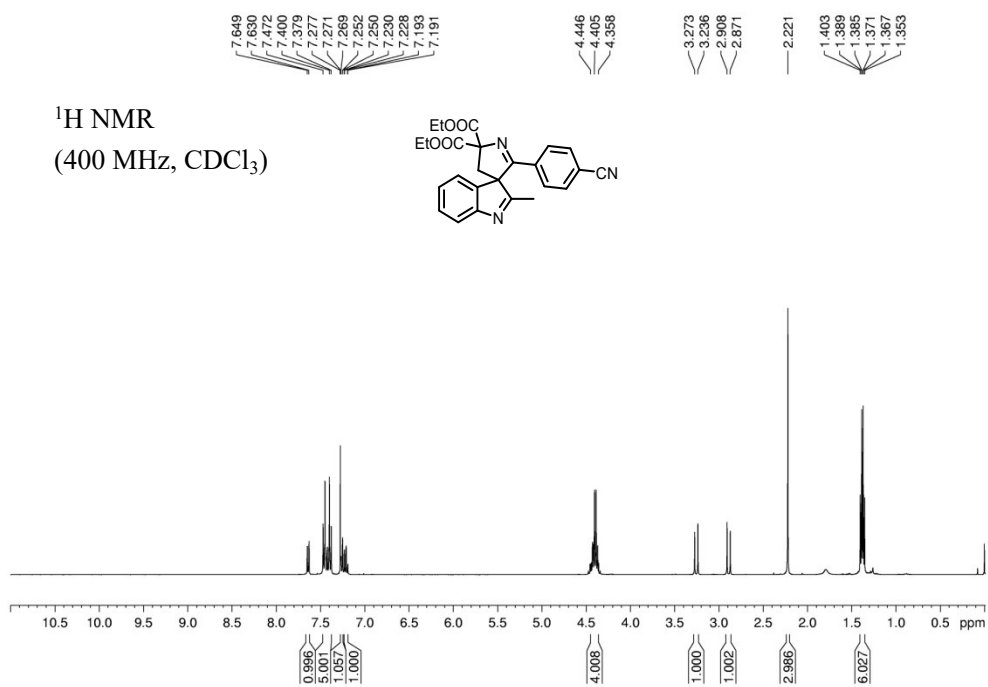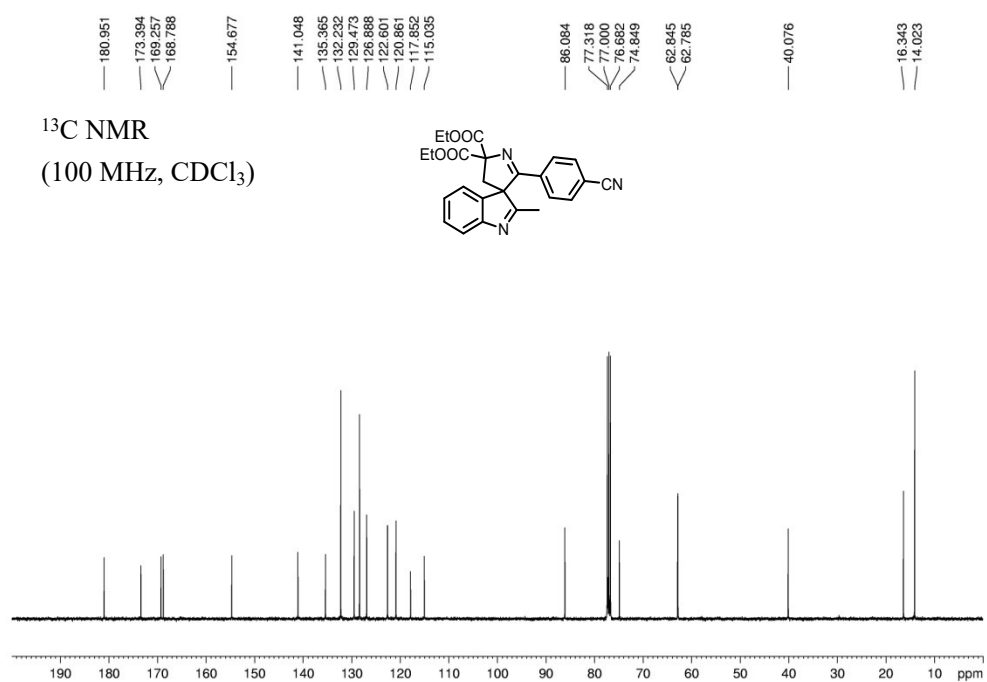

(3t)

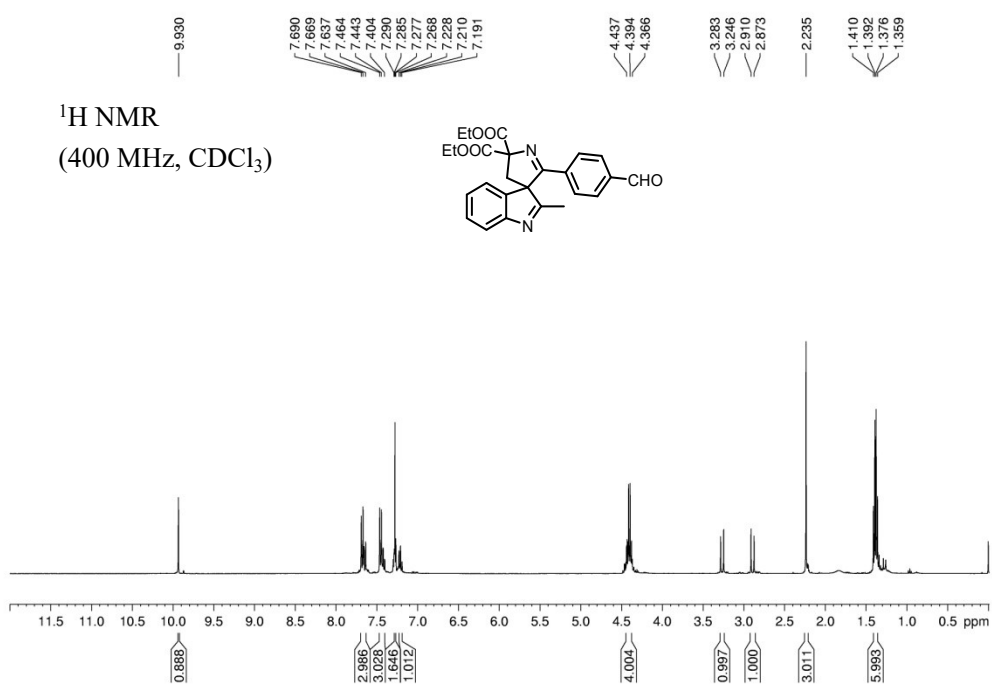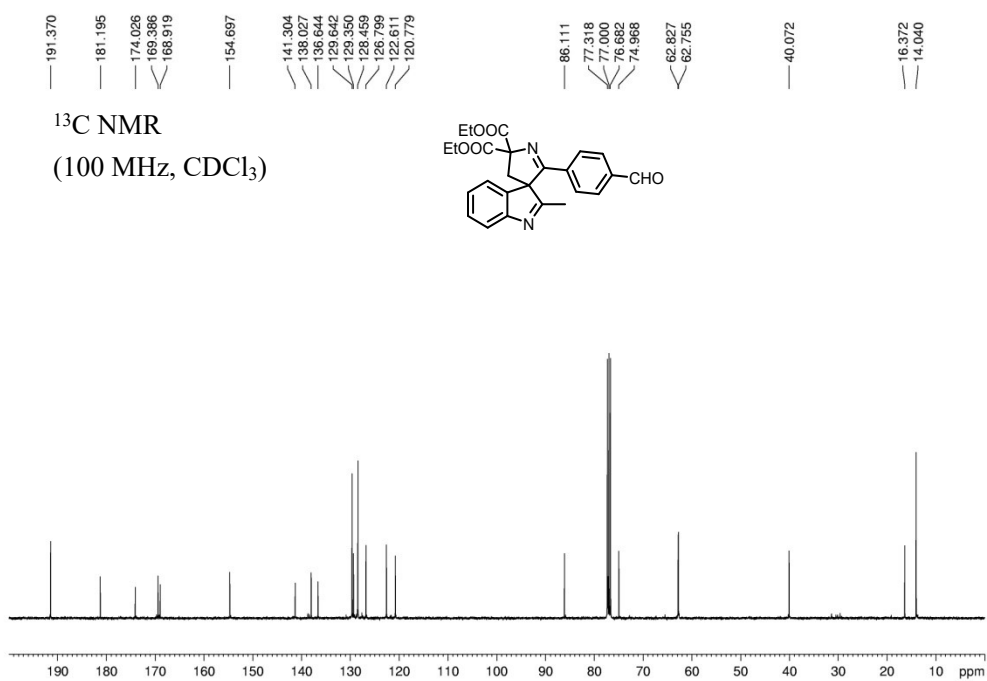

(3u)

<sup>1</sup>H NMR  
(400 MHz, CDCl<sub>3</sub>)

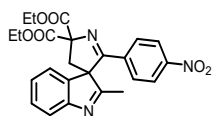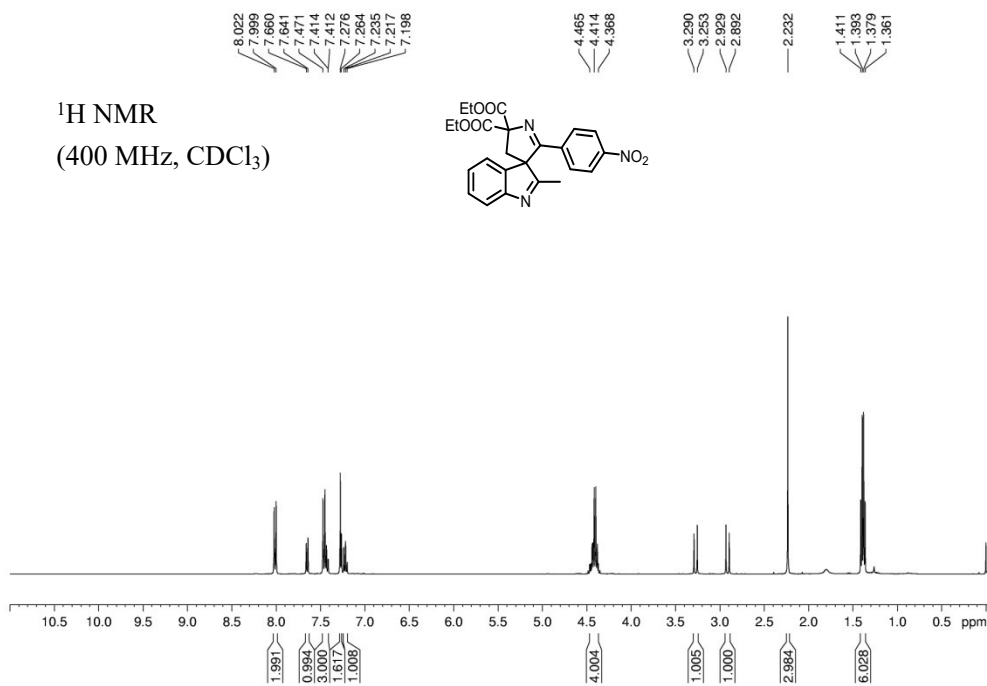

<sup>13</sup>C NMR  
(100 MHz, CDCl<sub>3</sub>)

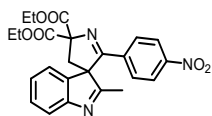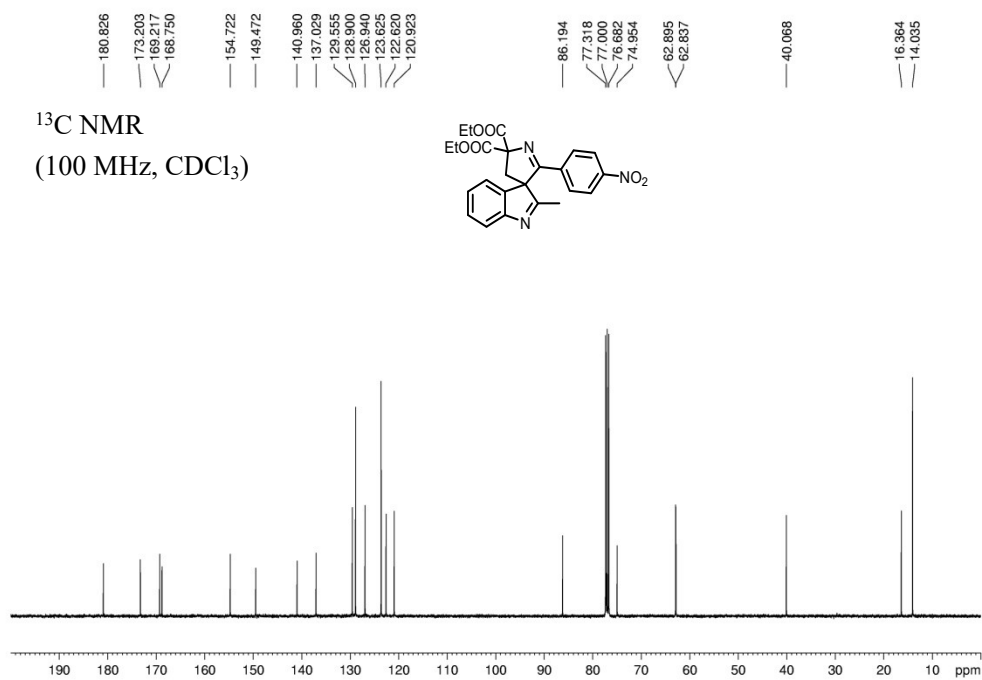

(3v)

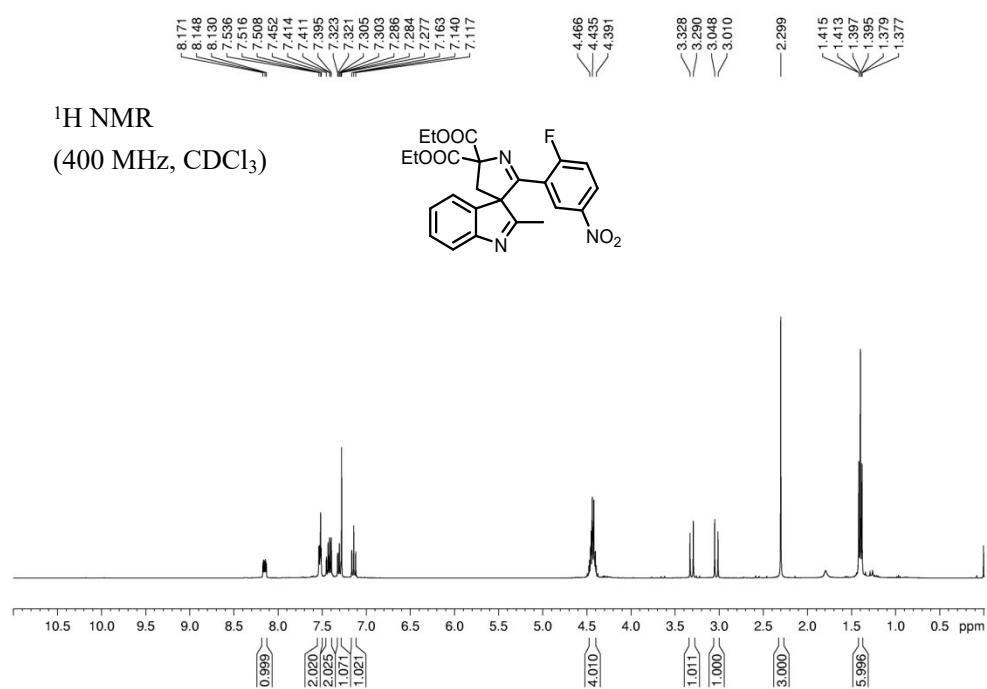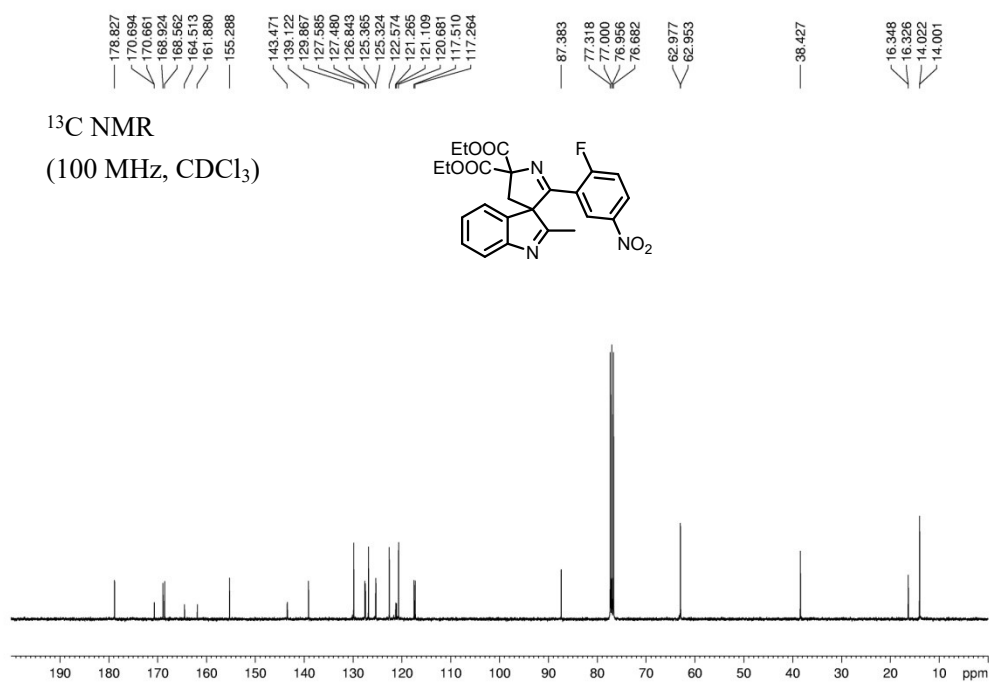

(3w)

$^1\text{H}$  NMR  
(400 MHz,  $\text{CDCl}_3$ )

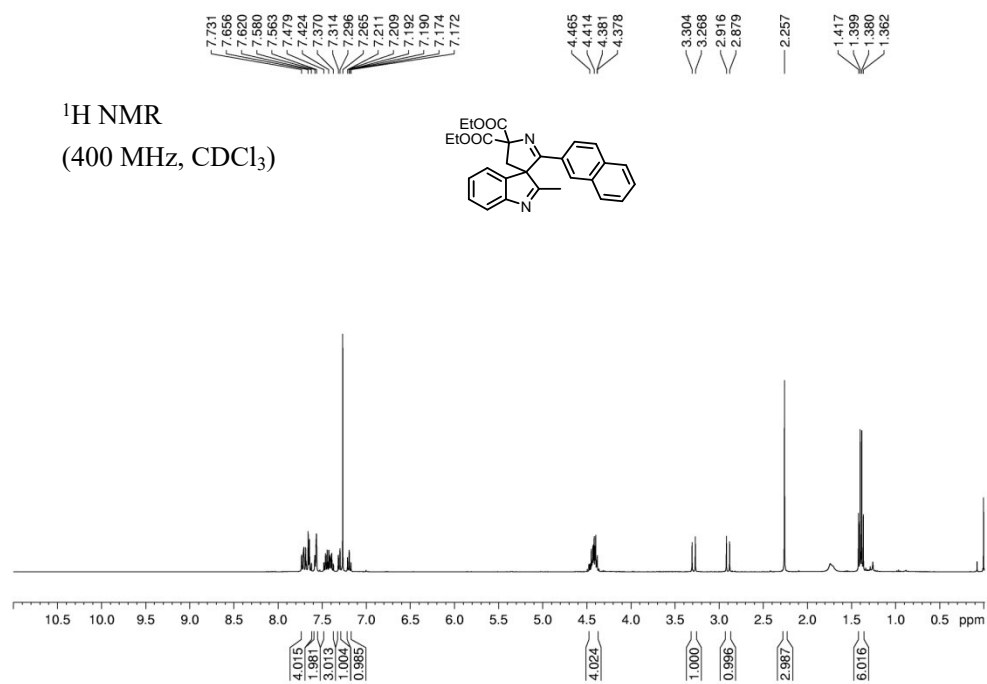

$^{13}\text{C}$  NMR  
(100 MHz,  $\text{CDCl}_3$ )

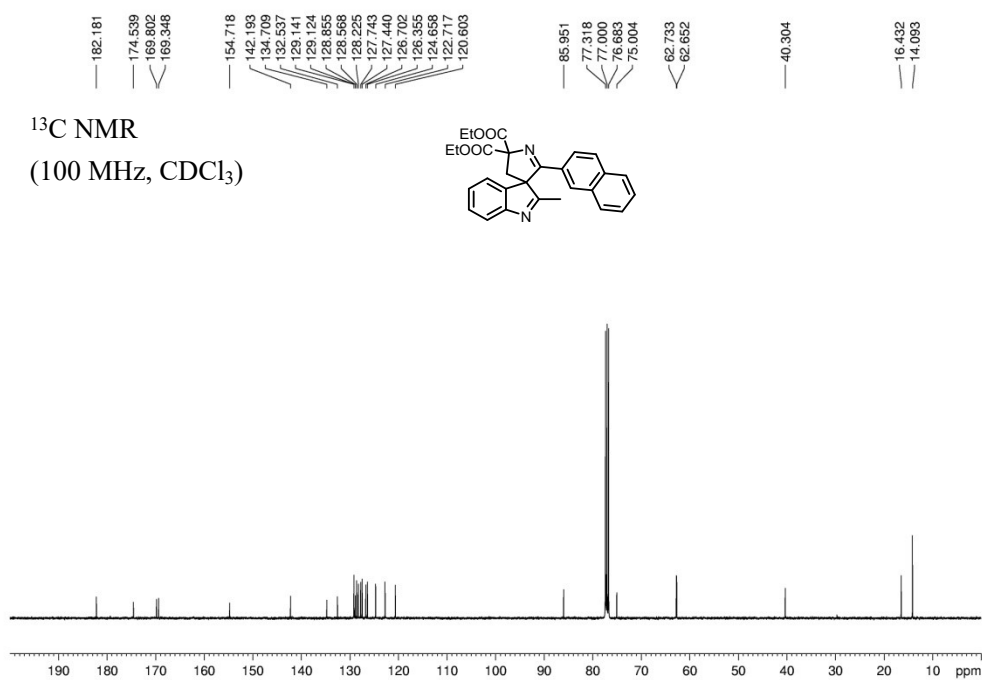

(3x)

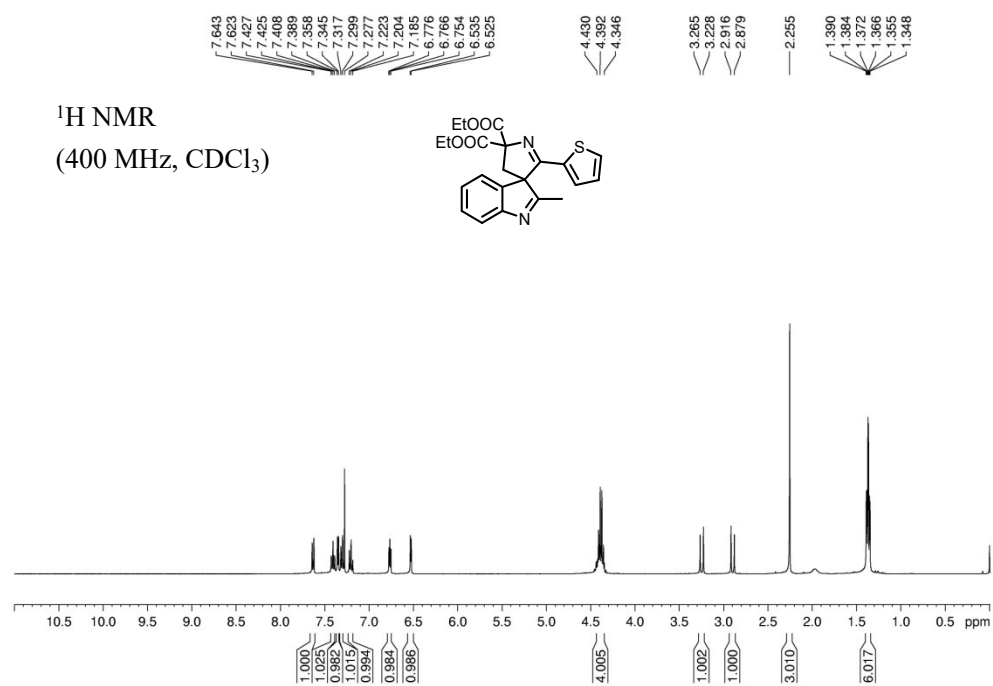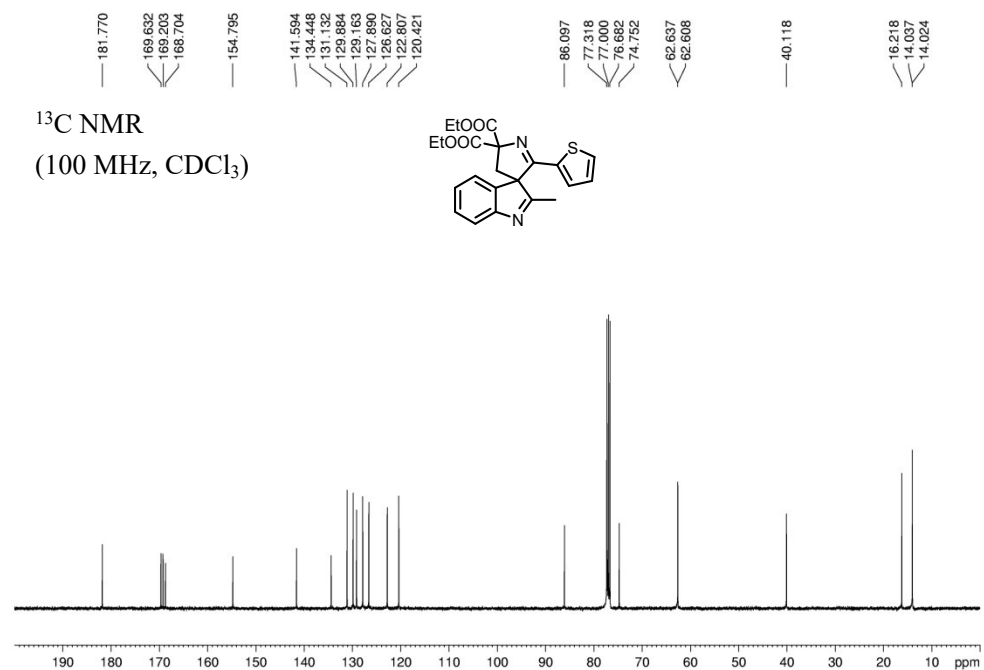



(3y)

$^1\text{H}$  NMR  
(400 MHz,  $\text{CDCl}_3$ )

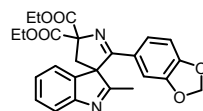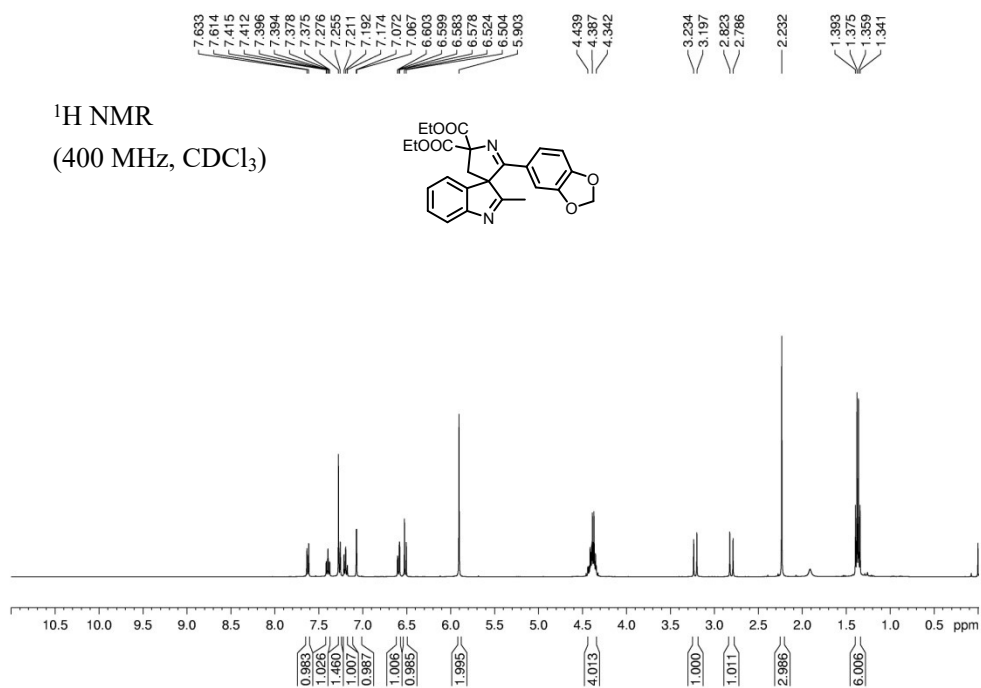

$^{13}\text{C}$  NMR  
(100 MHz,  $\text{CDCl}_3$ )

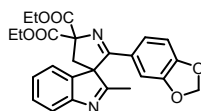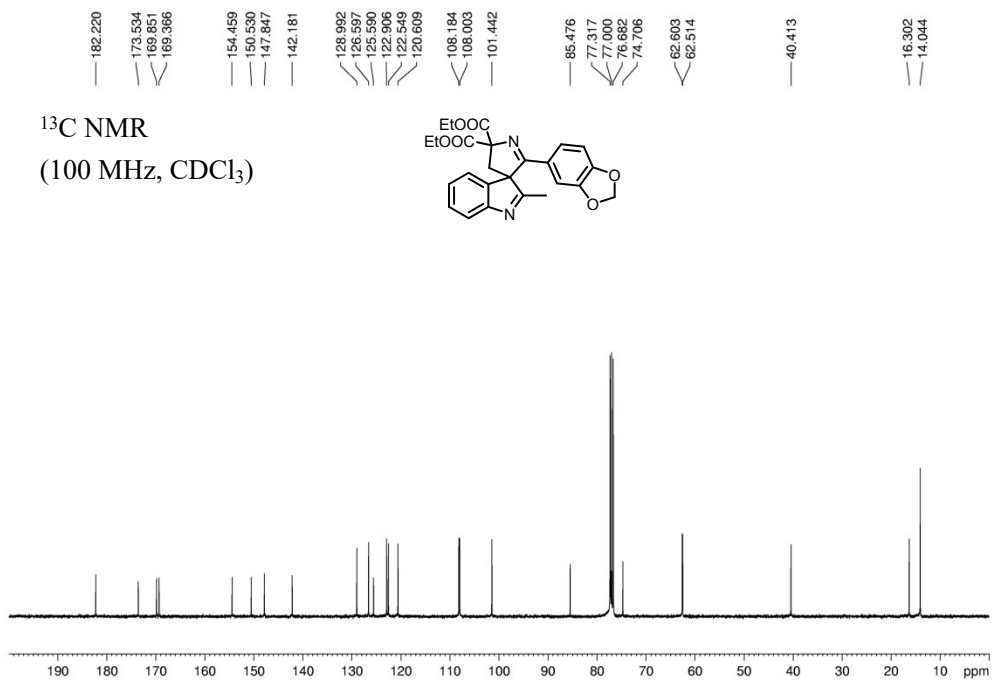

(3z)

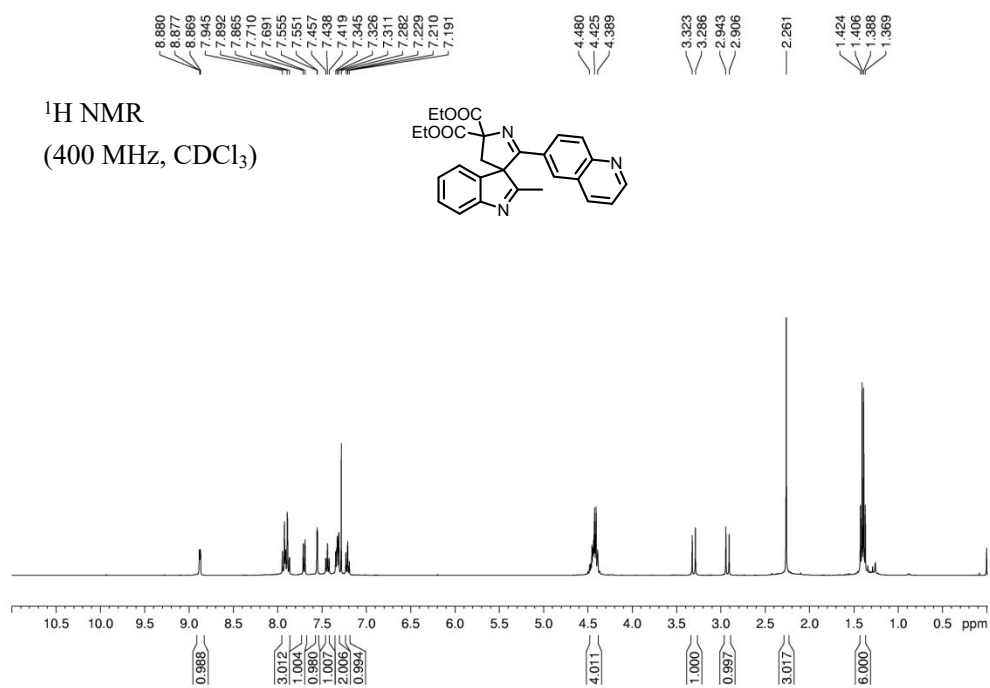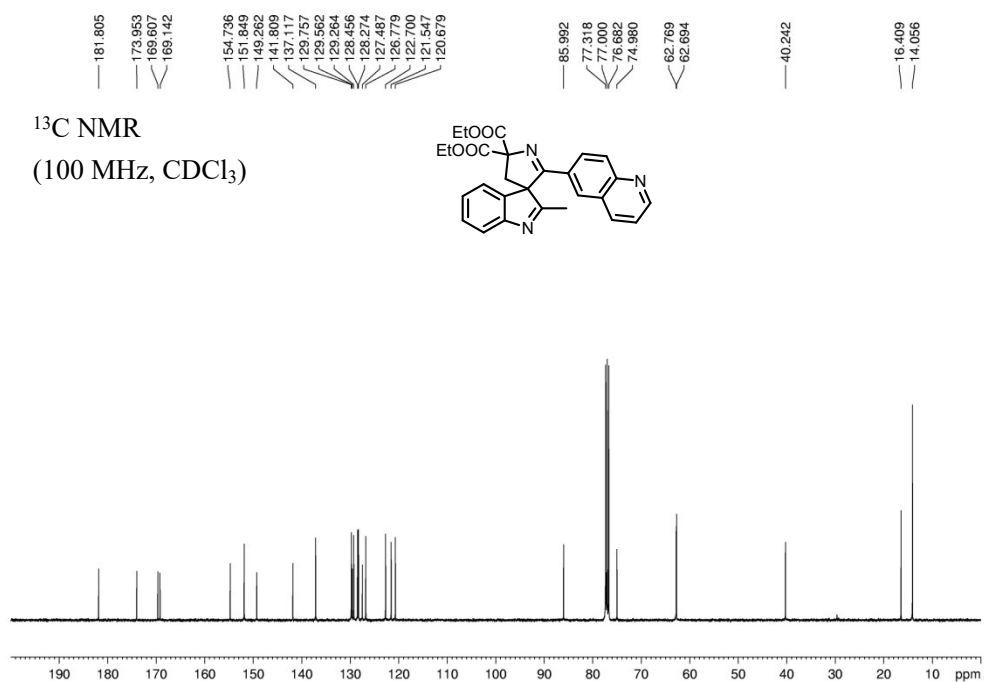

**(3aa)**

<sup>1</sup>H NMR  
(400 MHz, CDCl<sub>3</sub>)

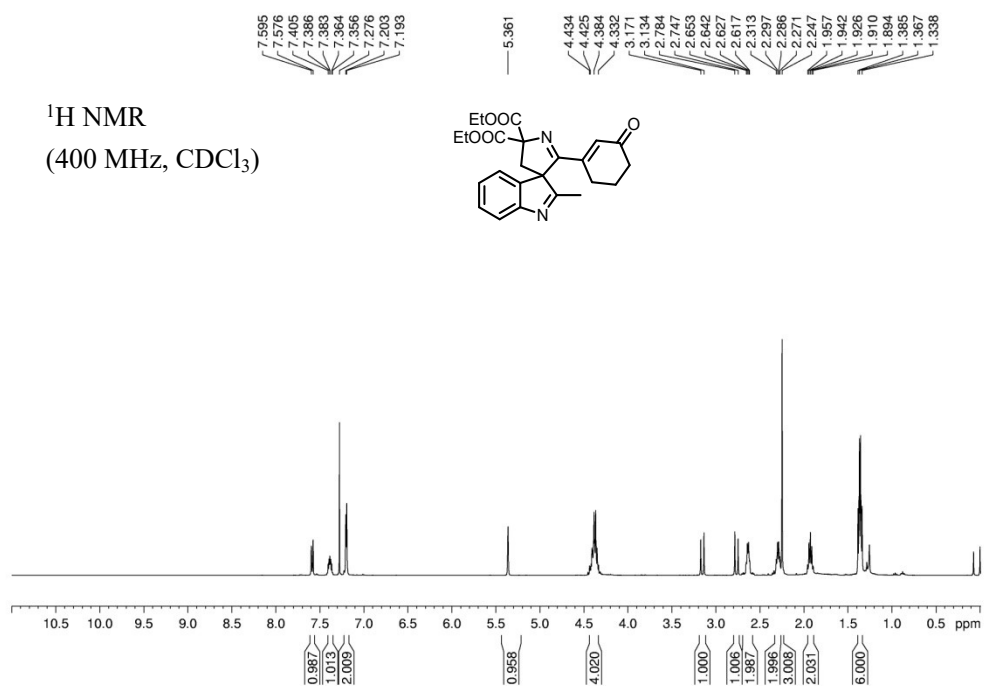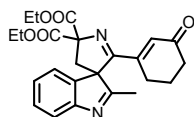

<sup>13</sup>C NMR  
(100 MHz, CDCl<sub>3</sub>)

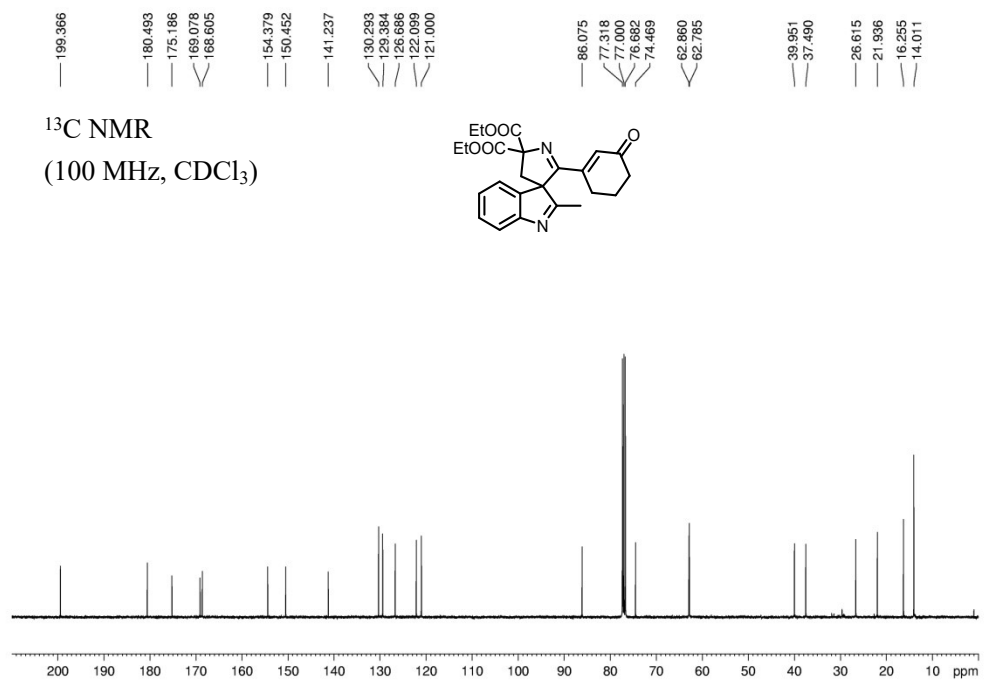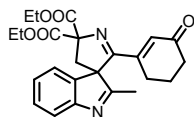

**(3ab)**

<sup>1</sup>H NMR  
(400 MHz, CDCl<sub>3</sub>)

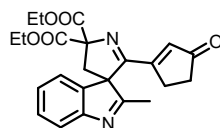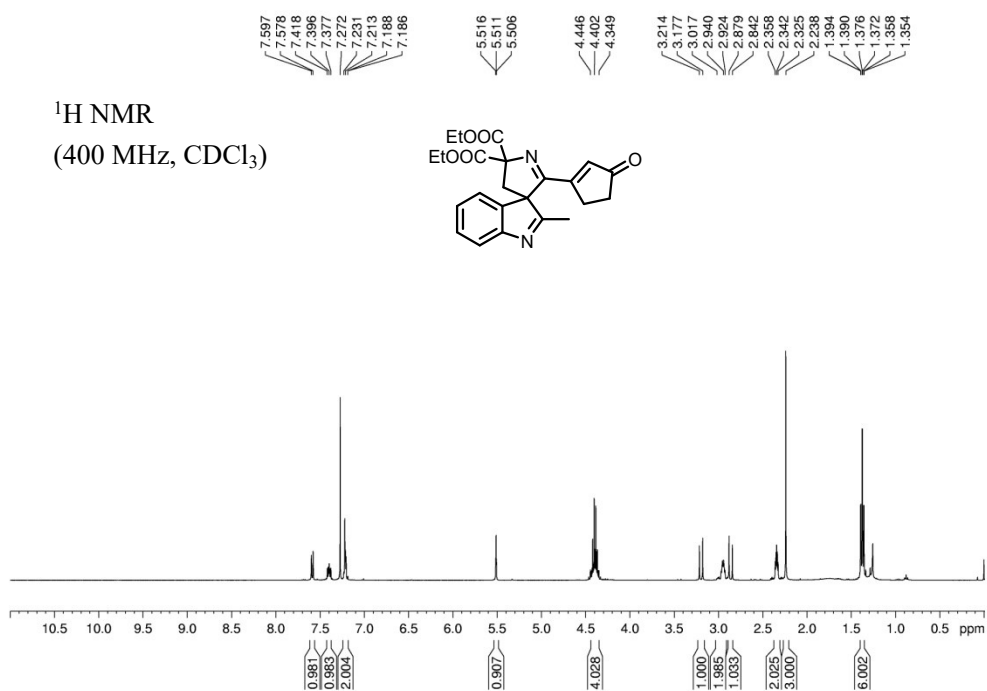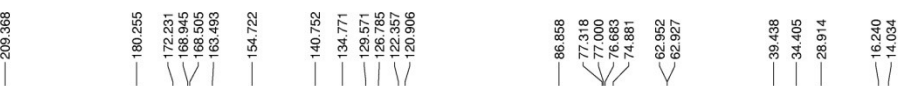

<sup>13</sup>C NMR  
(100 MHz, CDCl<sub>3</sub>)

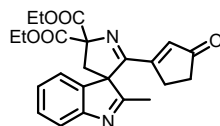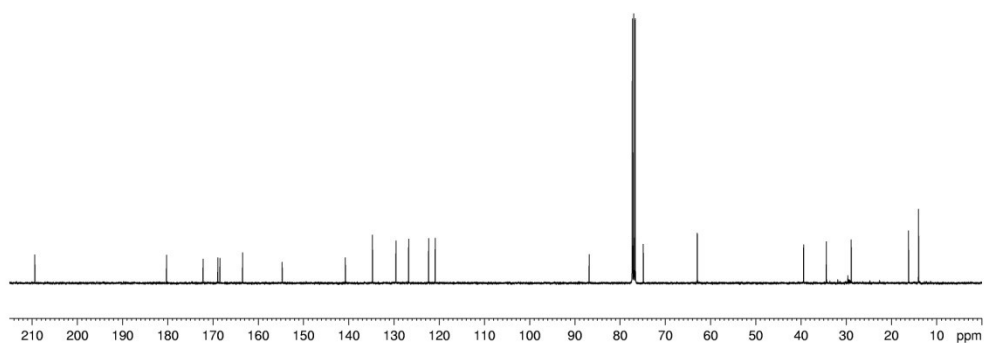

(3ac)

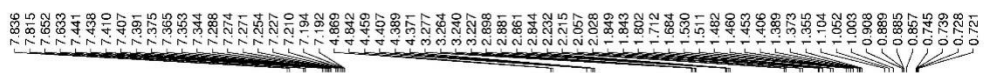

<sup>1</sup>H NMR  
(400 MHz, CDCl<sub>3</sub>)

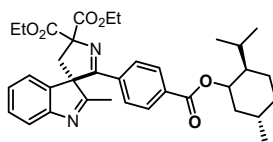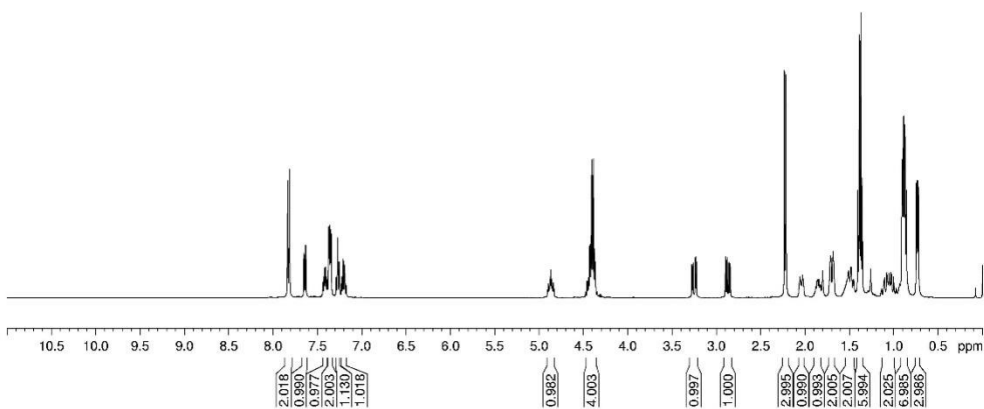

<sup>13</sup>C NMR  
(100 MHz, CDCl<sub>3</sub>)

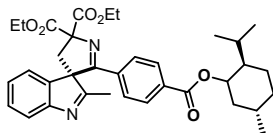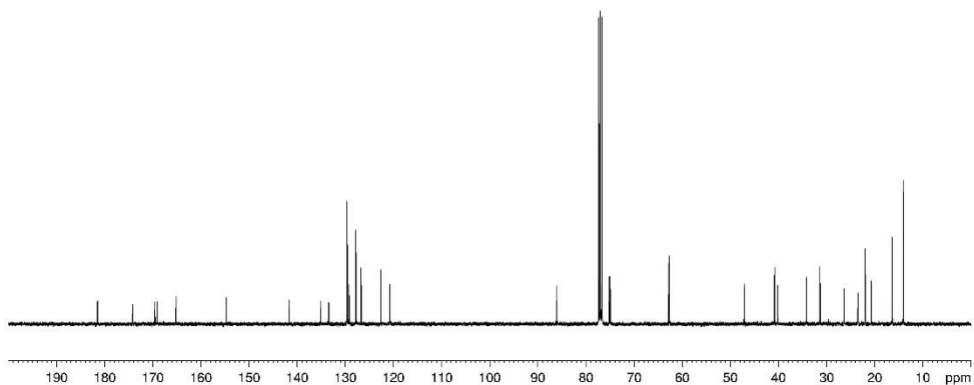

### (3ad)

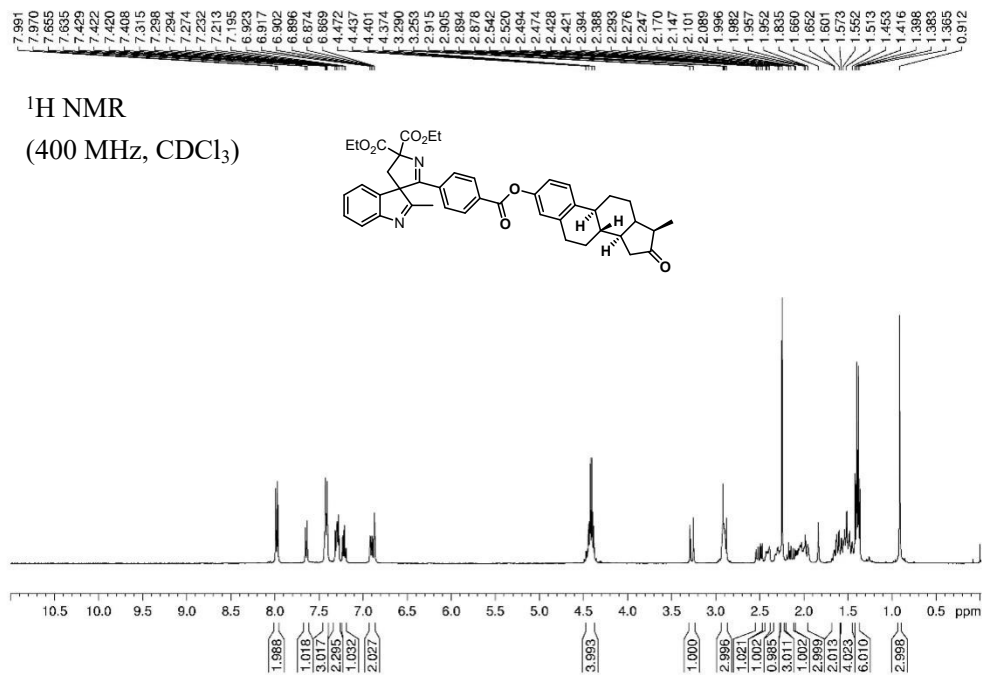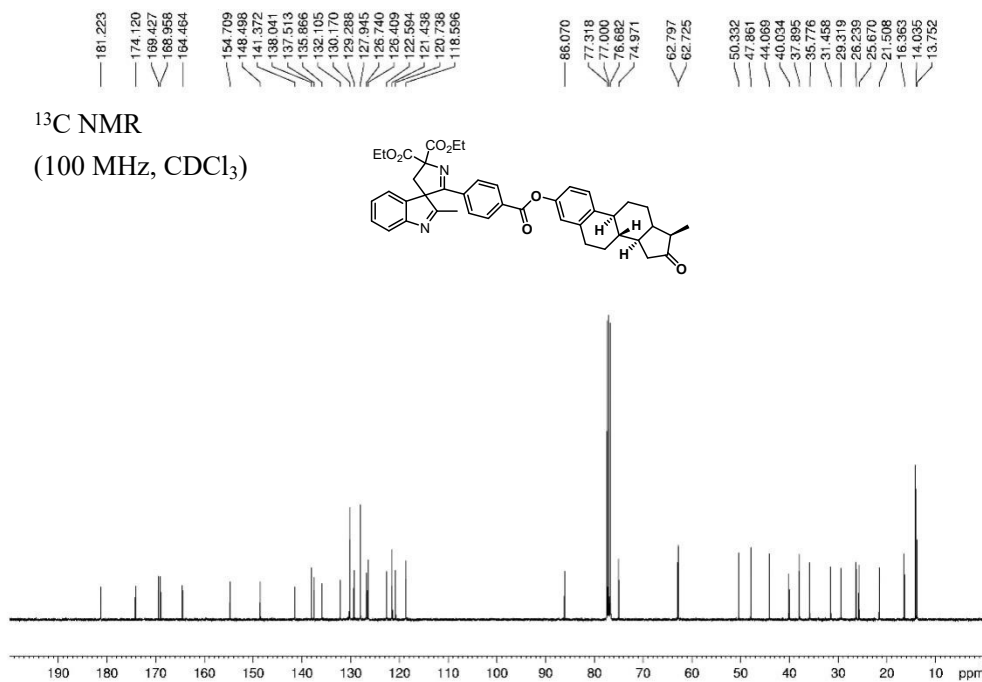

**(3ae)**

$^1\text{H NMR}$   
(400 MHz,  $\text{CDCl}_3$ )

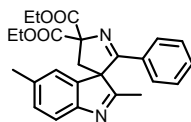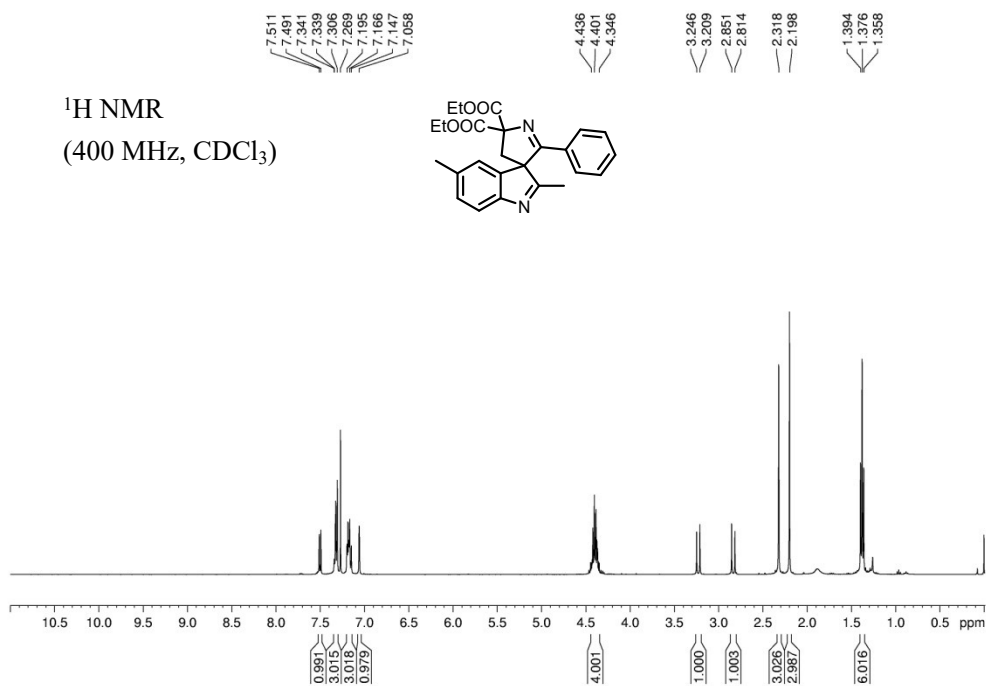

$^{13}\text{C NMR}$   
(100 MHz,  $\text{CDCl}_3$ )

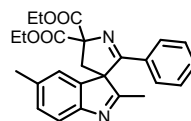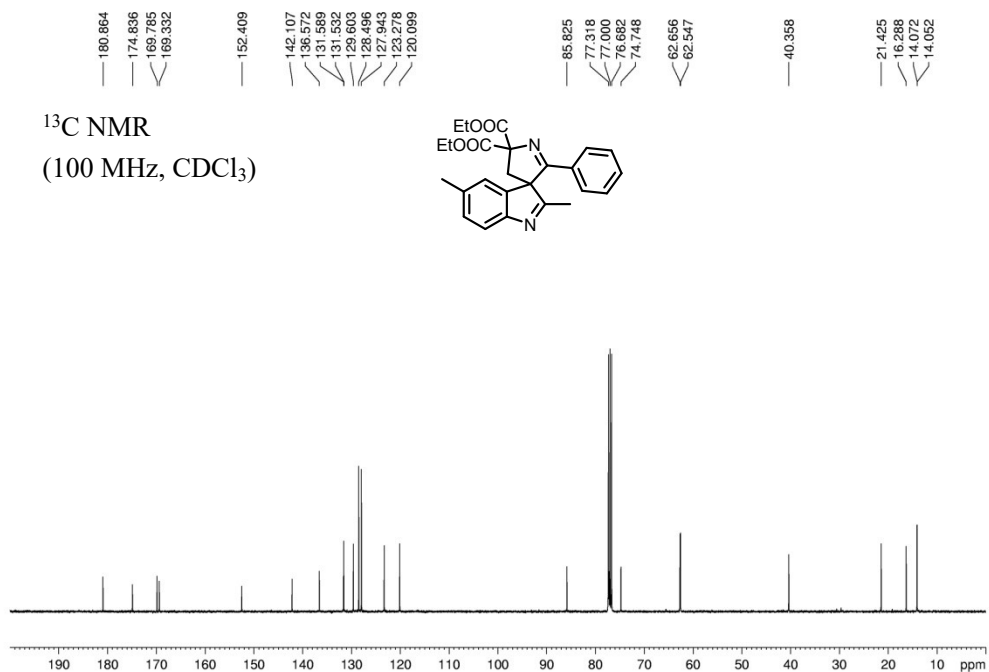

**(3af)**

<sup>1</sup>H NMR  
(400 MHz, CDCl<sub>3</sub>)

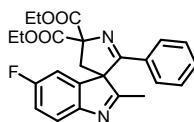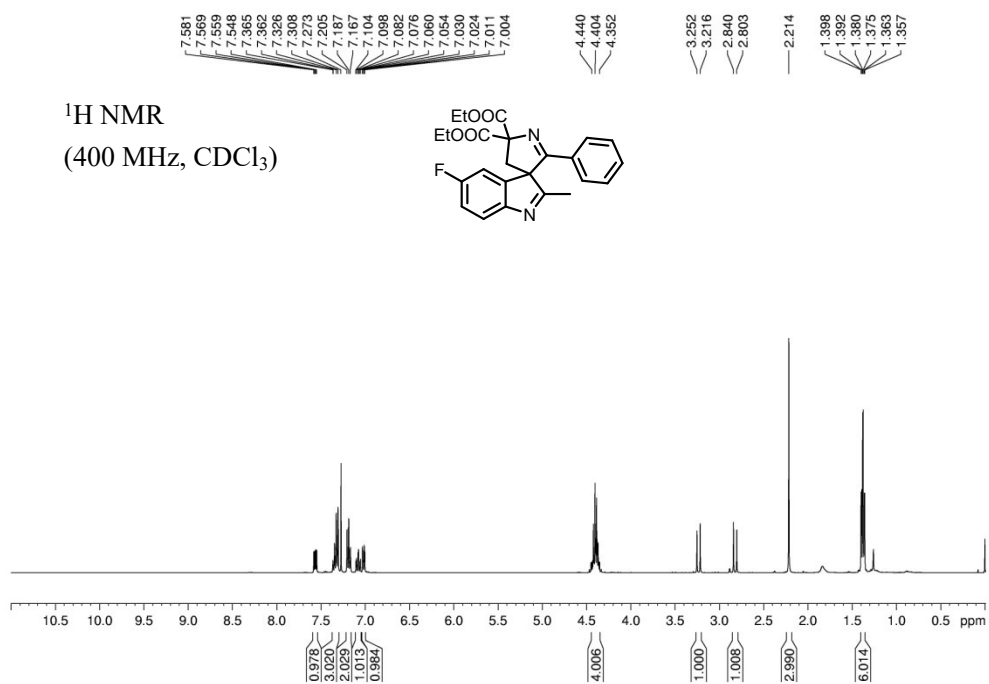

<sup>13</sup>C NMR  
(100 MHz, CDCl<sub>3</sub>)

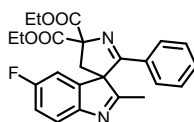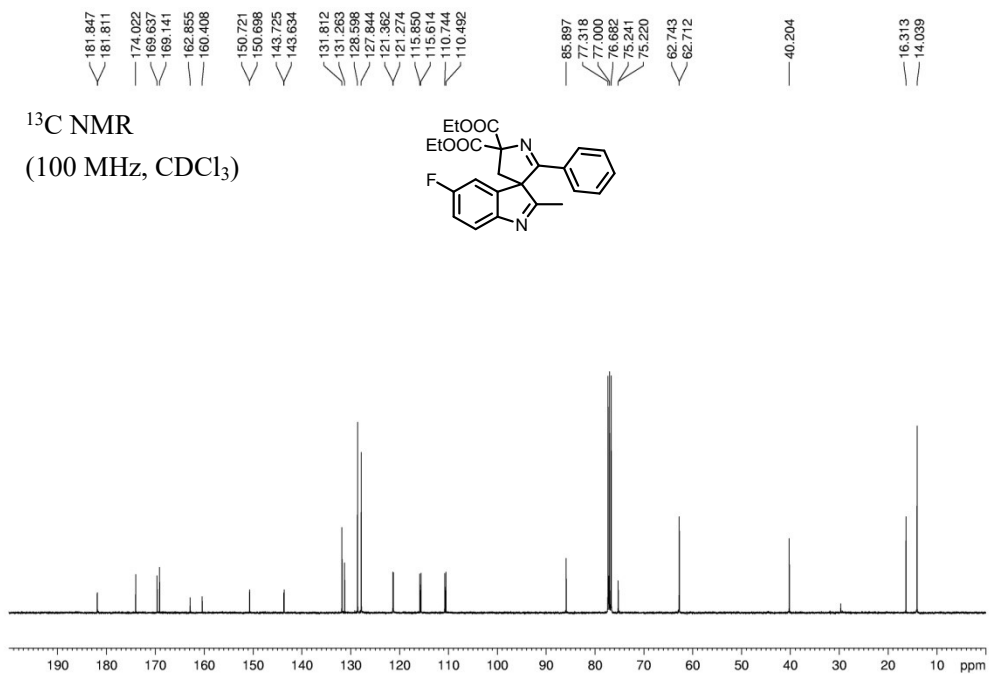



**(3ag)**

$^1\text{H}$  NMR  
(400 MHz,  $\text{CDCl}_3$ )

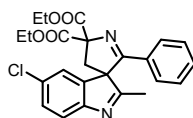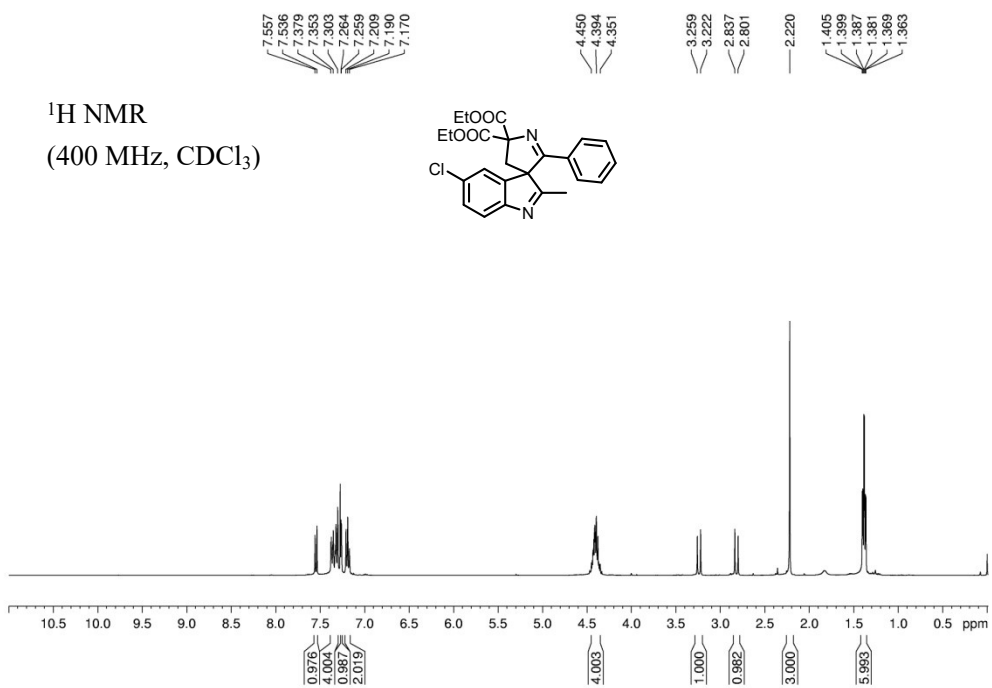

$^{13}\text{C}$  NMR  
(100 MHz,  $\text{CDCl}_3$ )

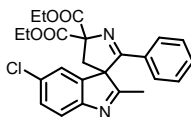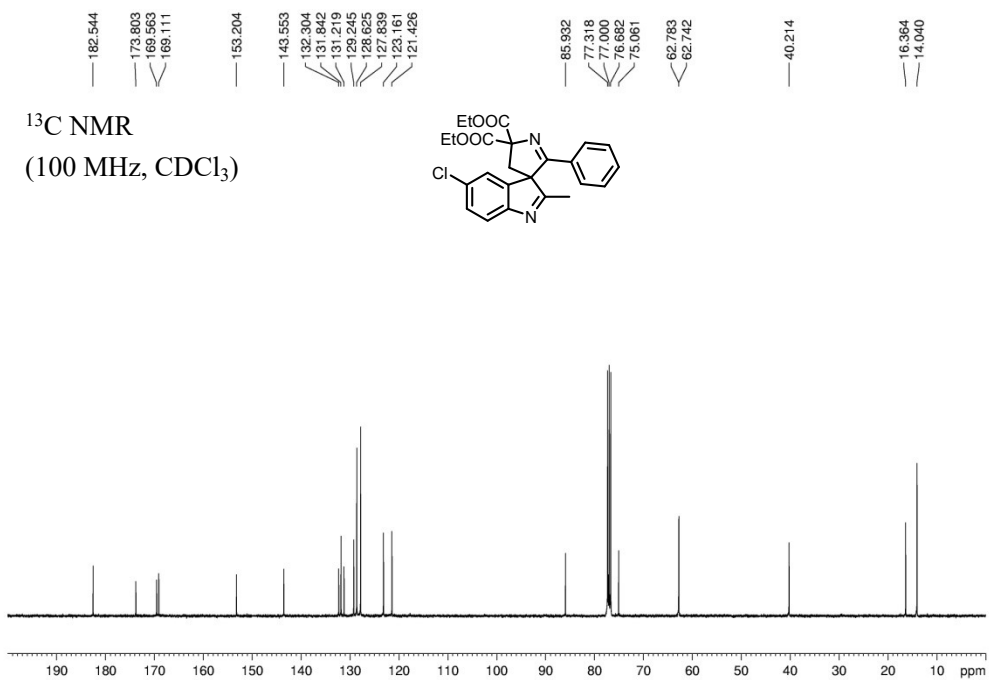

**(3ah)**

<sup>1</sup>H NMR  
(400 MHz, CDCl<sub>3</sub>)

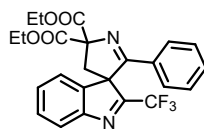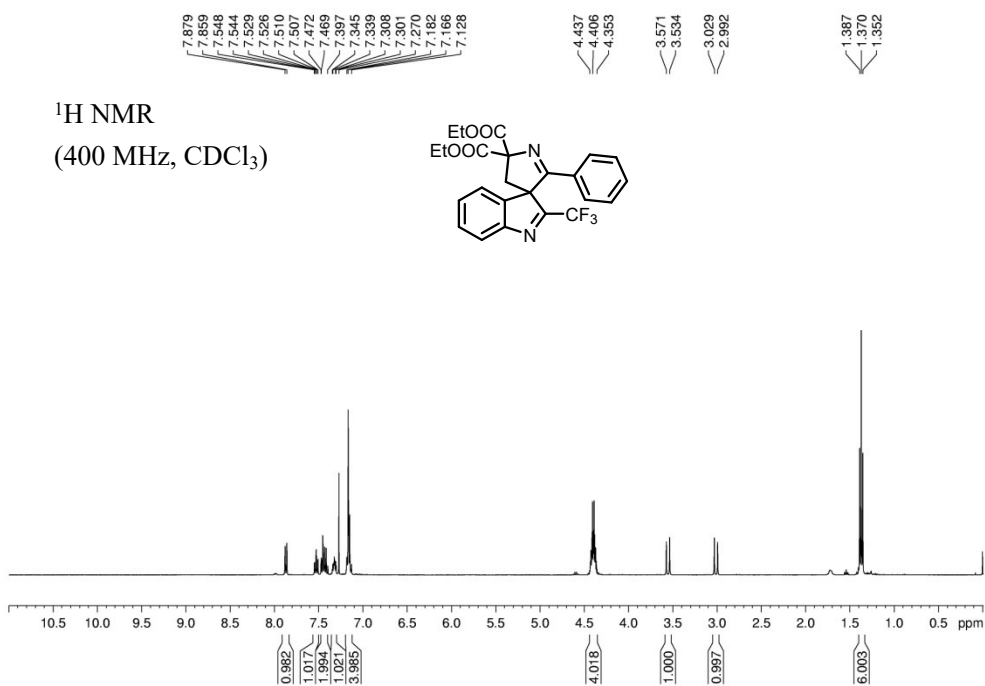

<sup>13</sup>C NMR  
(100 MHz, CDCl<sub>3</sub>)

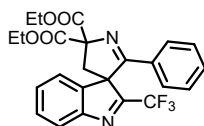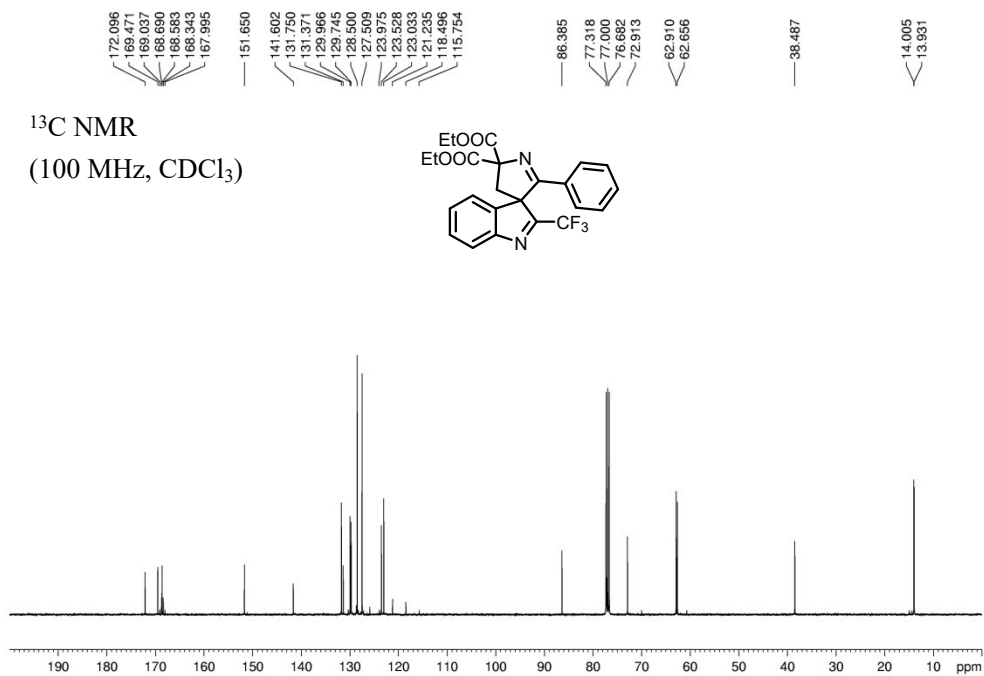

**(3ai)**

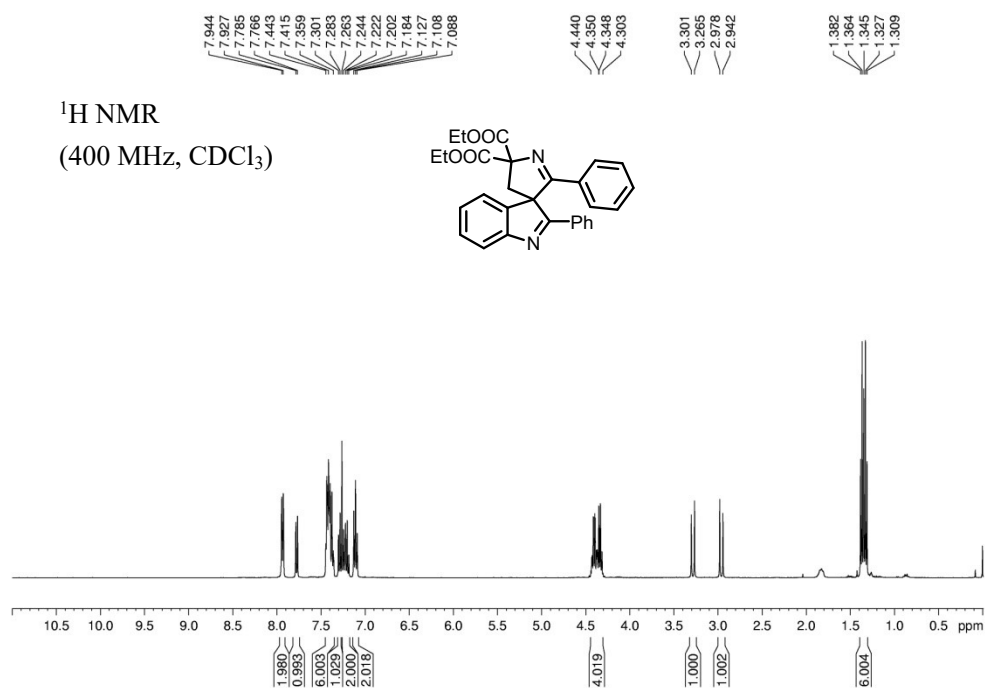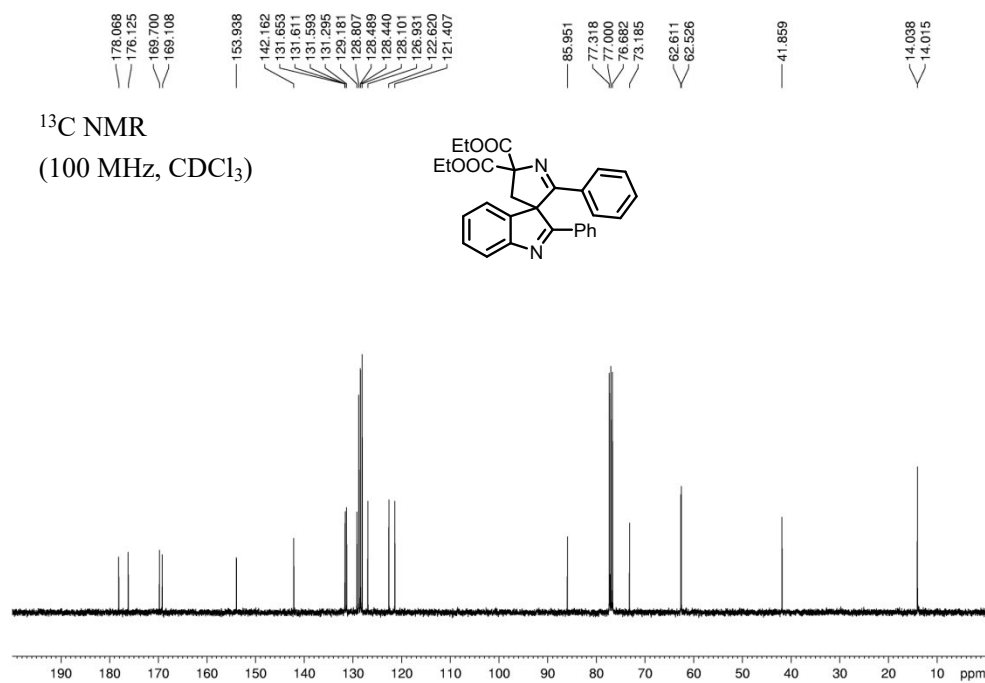

**(3aj)**

7.678  
7.663  
7.412  
7.407  
7.395  
7.384  
7.379  
7.308  
7.293  
7.279  
7.239  
7.226  
7.211  
7.195  
7.183  
7.167  
7.152  
7.136

5.283  
5.267  
5.251

4.345  
4.331  
4.317  
4.303

2.839  
2.823  
2.812  
2.796  
2.456  
2.440  
2.429  
2.413  
2.270  
1.371  
1.357  
1.343

<sup>1</sup>H NMR  
(500 MHz, CDCl<sub>3</sub>)

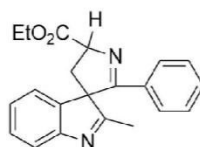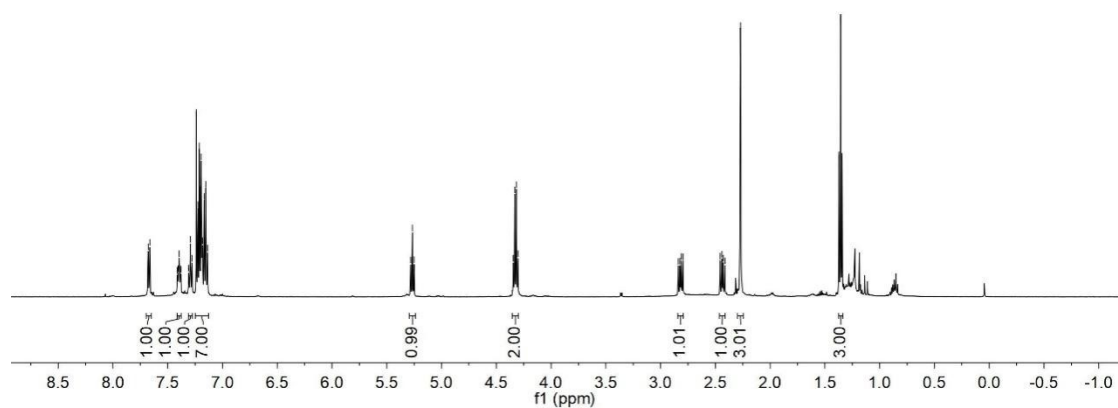

183.166  
172.751  
171.754  
153.221  
141.419  
131.741  
131.416  
129.126  
128.635  
127.400  
126.649  
121.745  
120.676  
74.379  
73.201  
61.782  
38.186  
16.511  
14.193

<sup>13</sup>C NMR  
(125 MHz, CDCl<sub>3</sub>)

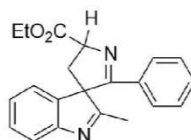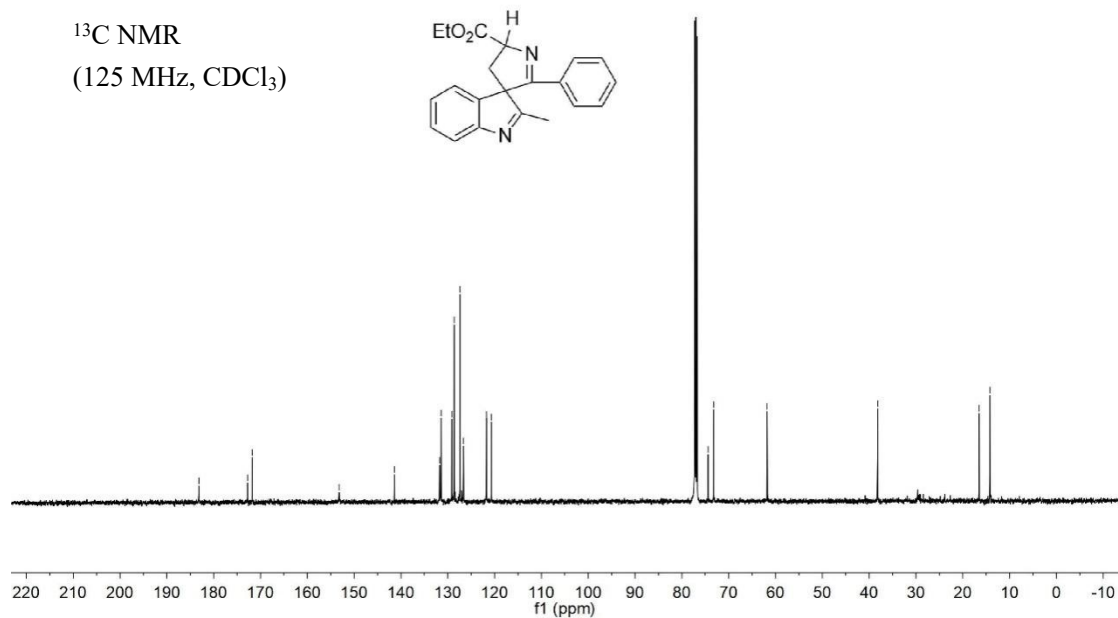

**(3aj)**

7.676  
7.660  
7.422  
7.407  
7.391  
7.382  
7.368  
7.314  
7.299  
7.285  
7.260  
7.231  
7.215  
7.206  
7.183  
7.148  
7.132  
5.248  
5.235  
5.231  
5.218  
4.365  
4.351  
4.337  
4.323  
2.779  
2.761  
2.751  
2.733  
2.675  
2.662  
2.646  
2.633  
2.281  
1.390  
1.375  
1.361

<sup>1</sup>H NMR  
(500 MHz, CDCl<sub>3</sub>)

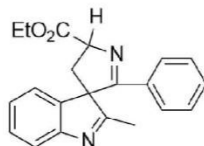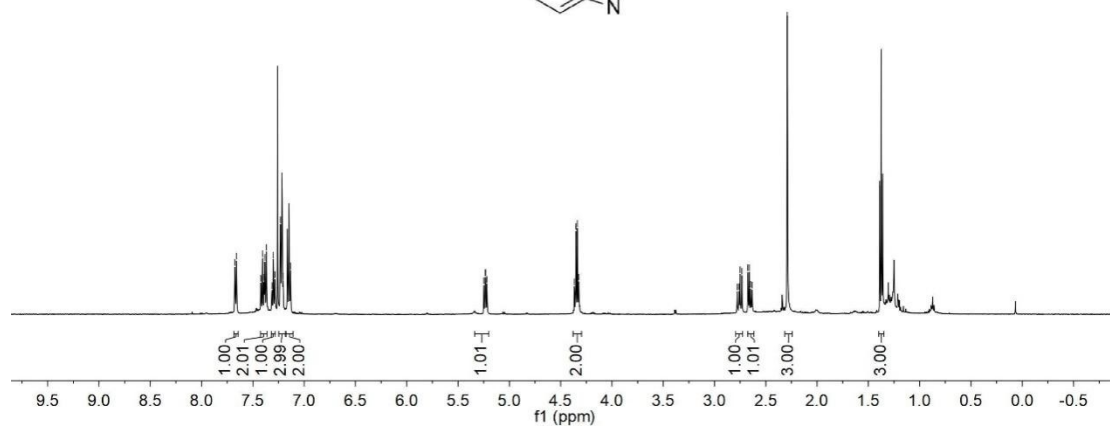

<sup>13</sup>C NMR  
(125 MHz, CDCl<sub>3</sub>)

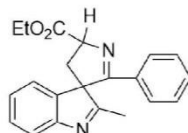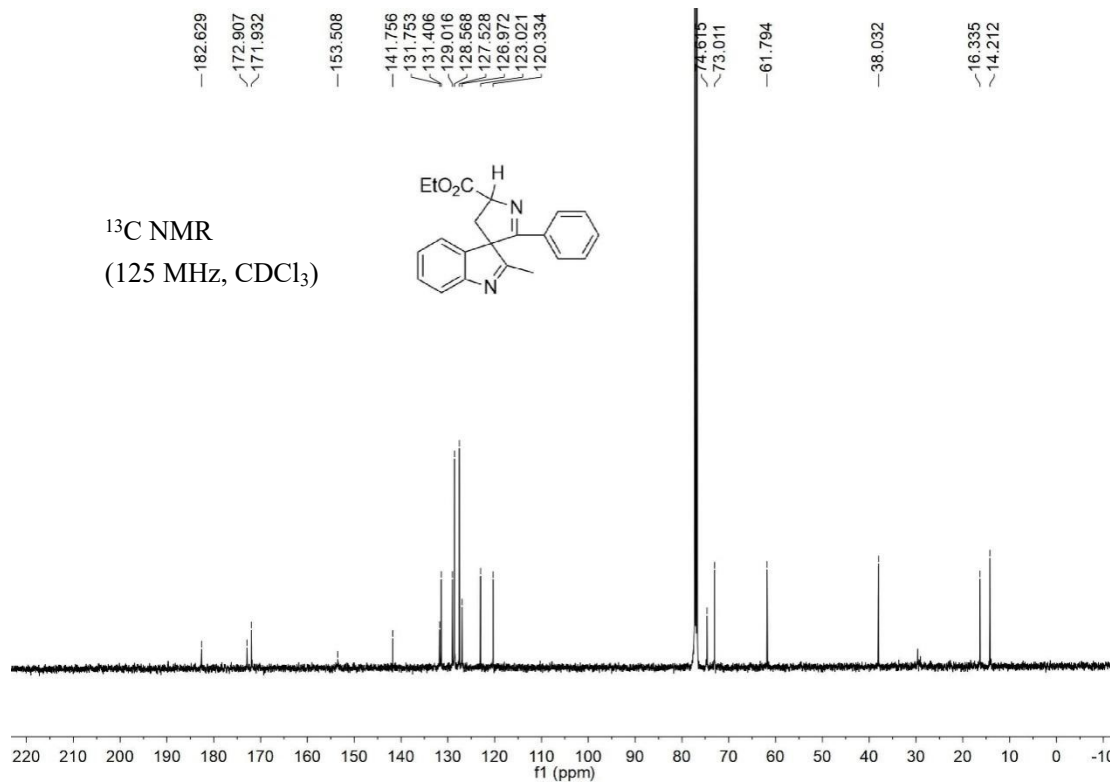

(3ak)

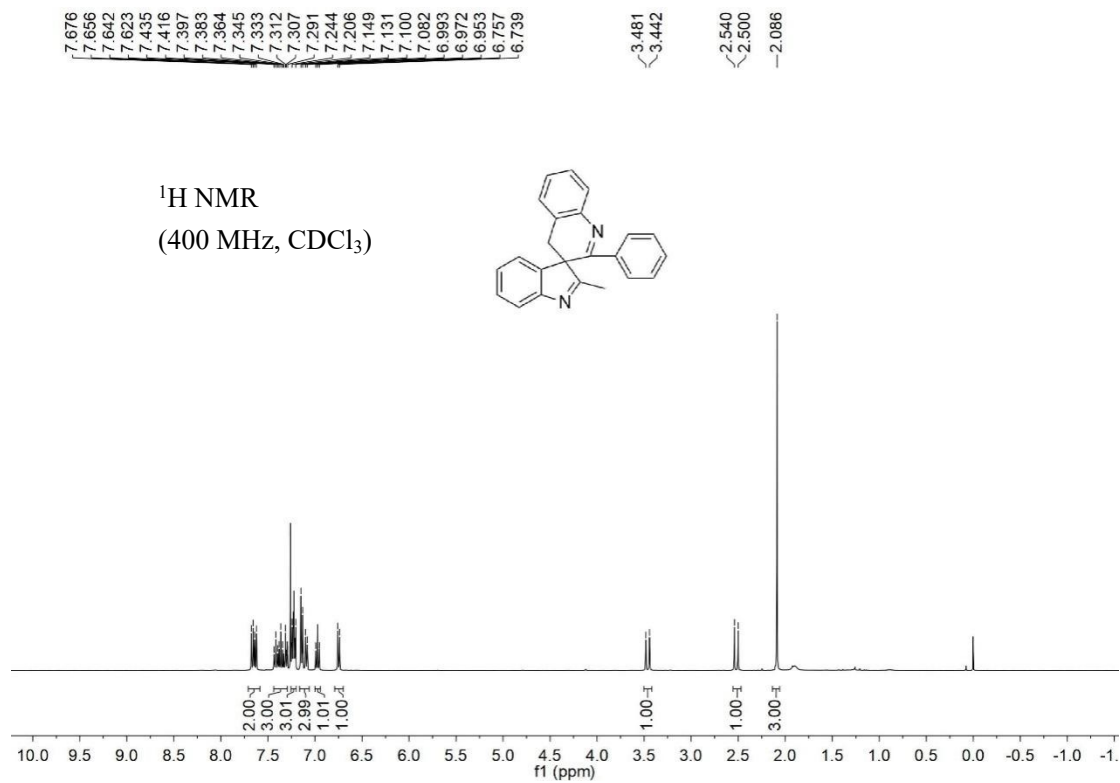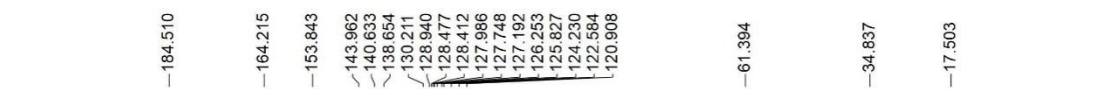

(5a)

$^1\text{H}$  NMR  
(400 MHz,  $\text{CDCl}_3$ )

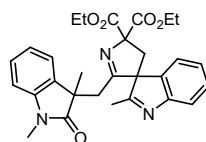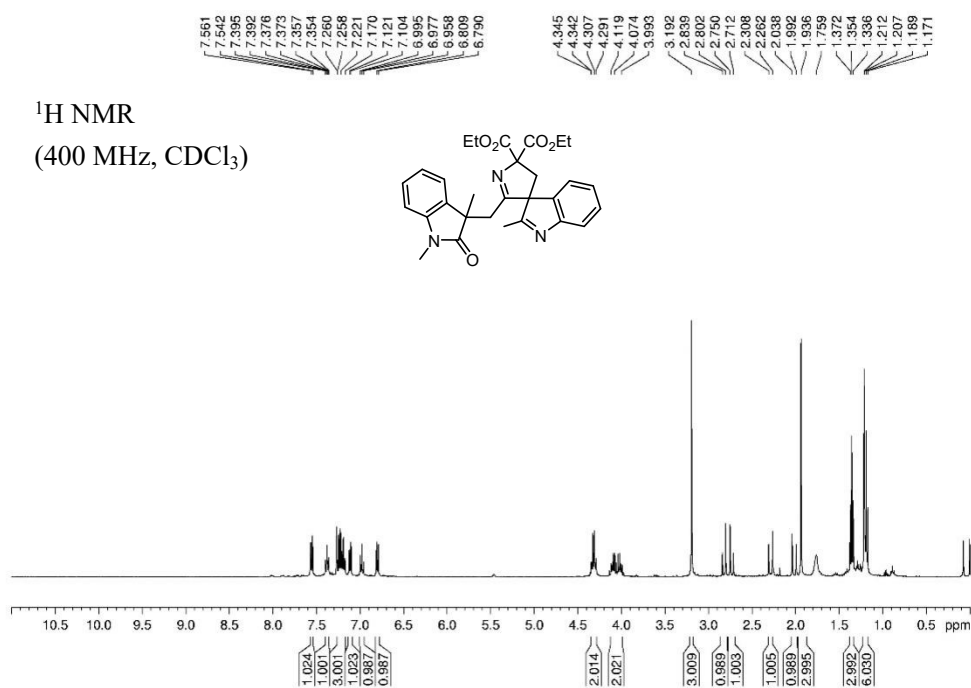

$^{13}\text{C}$  NMR  
(100 MHz,  $\text{CDCl}_3$ )

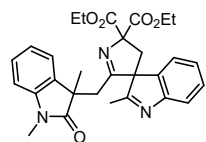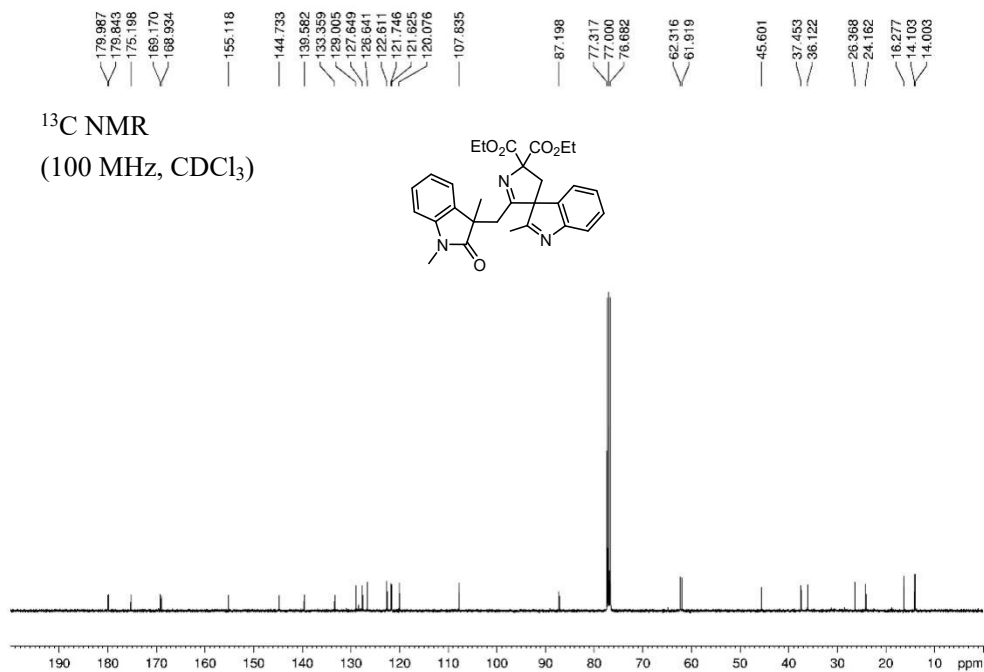

(5a')

7.555  
7.536  
7.388  
7.367  
7.348  
7.251  
7.232  
7.215  
7.197  
7.180  
7.164  
7.115  
7.097  
6.989  
6.970  
6.952  
6.803  
6.784  
4.340  
4.336  
4.330  
4.322  
4.318  
4.312  
4.304  
4.300  
4.291  
4.286  
4.283  
4.278  
4.112  
4.104  
4.095  
4.086  
4.077  
4.068  
4.049  
4.030  
4.022  
4.013  
4.004  
3.995  
3.986  
3.186  
2.833  
2.795  
2.744  
2.706  
2.301  
2.256  
2.031  
1.986  
1.930  
1.366  
1.348  
1.330  
1.201  
1.183  
1.165

$^1\text{H}$  NMR  
(400 MHz,  $\text{CDCl}_3$ )

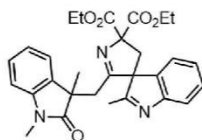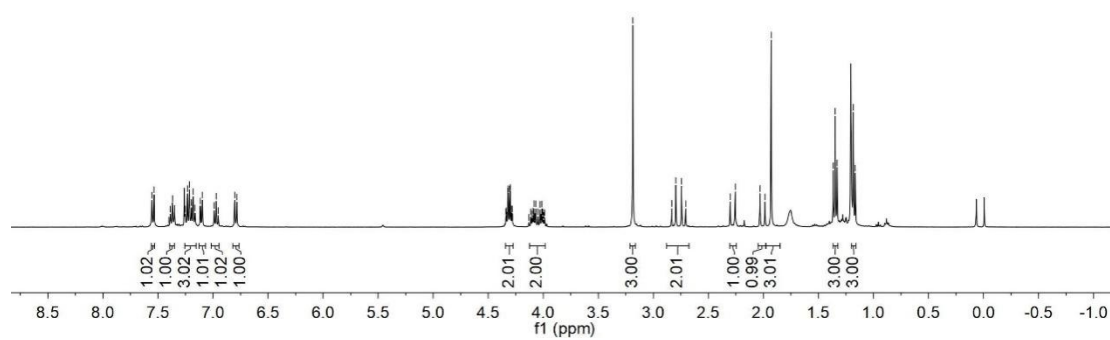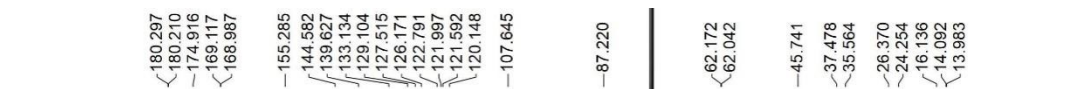

$^{13}\text{C}$  NMR  
(100 MHz,  $\text{CDCl}_3$ )

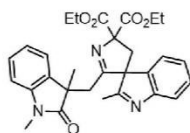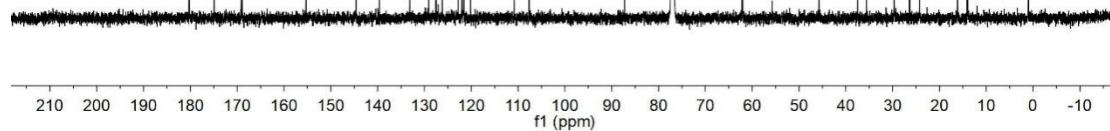



(5b)

$^1\text{H}$  NMR  
(500 MHz,  $\text{CDCl}_3$ )

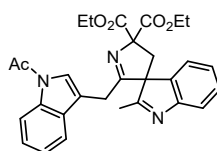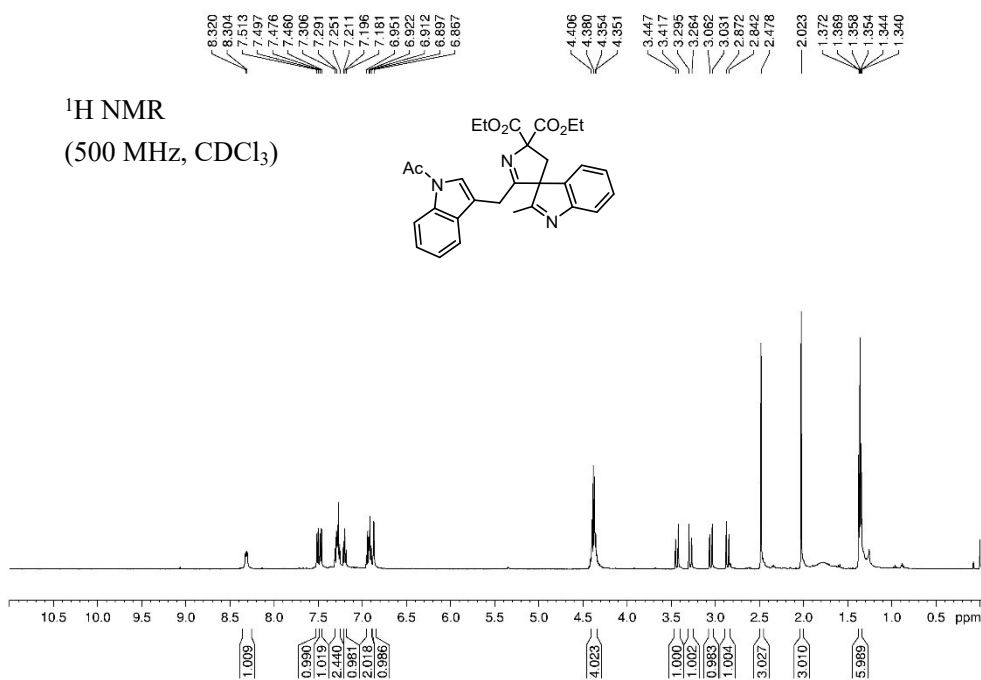

$^{13}\text{C}$  NMR  
(100 MHz,  $\text{CDCl}_3$ )

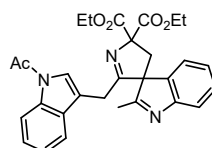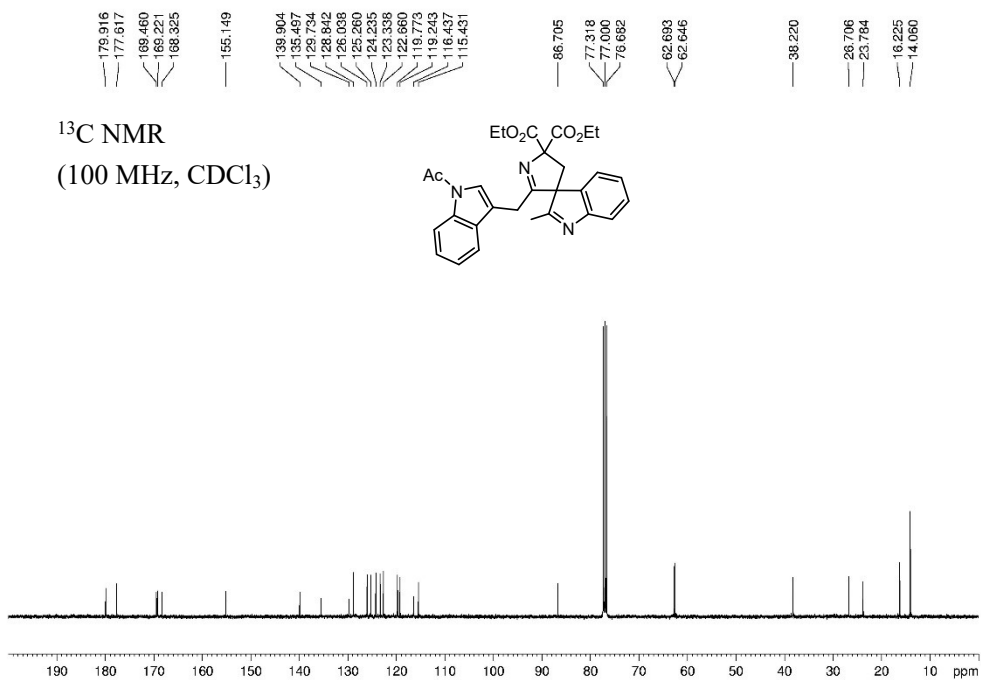

(5c)

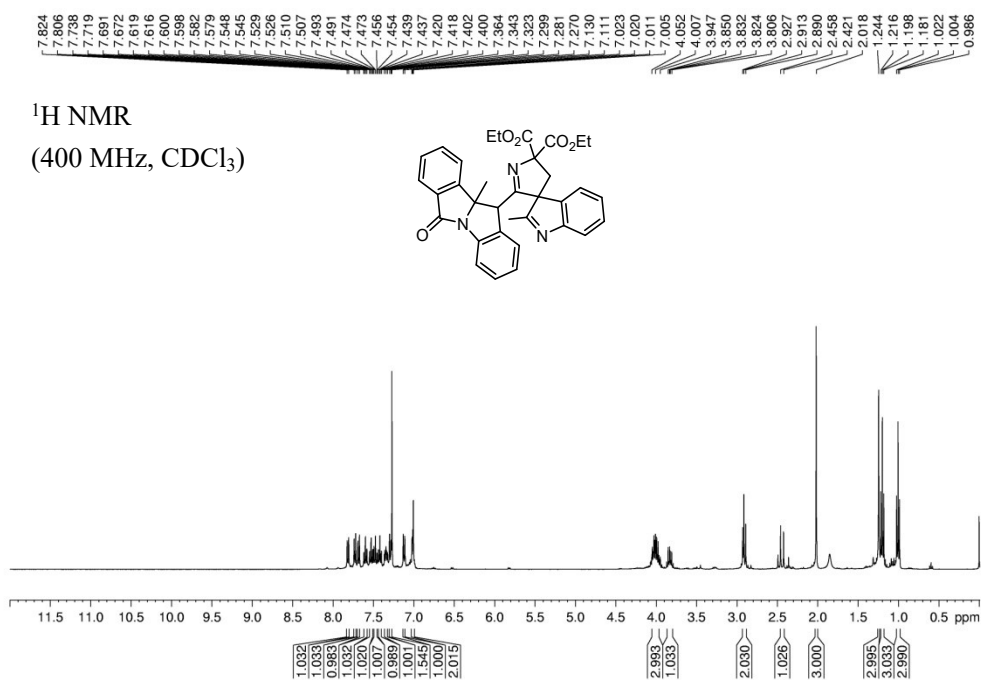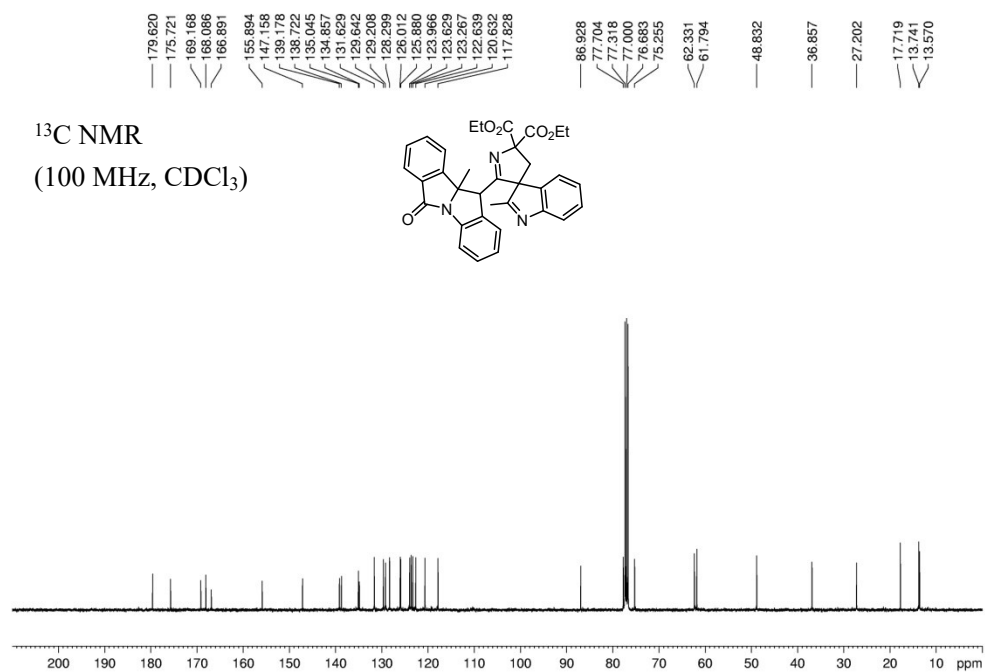

(5c')

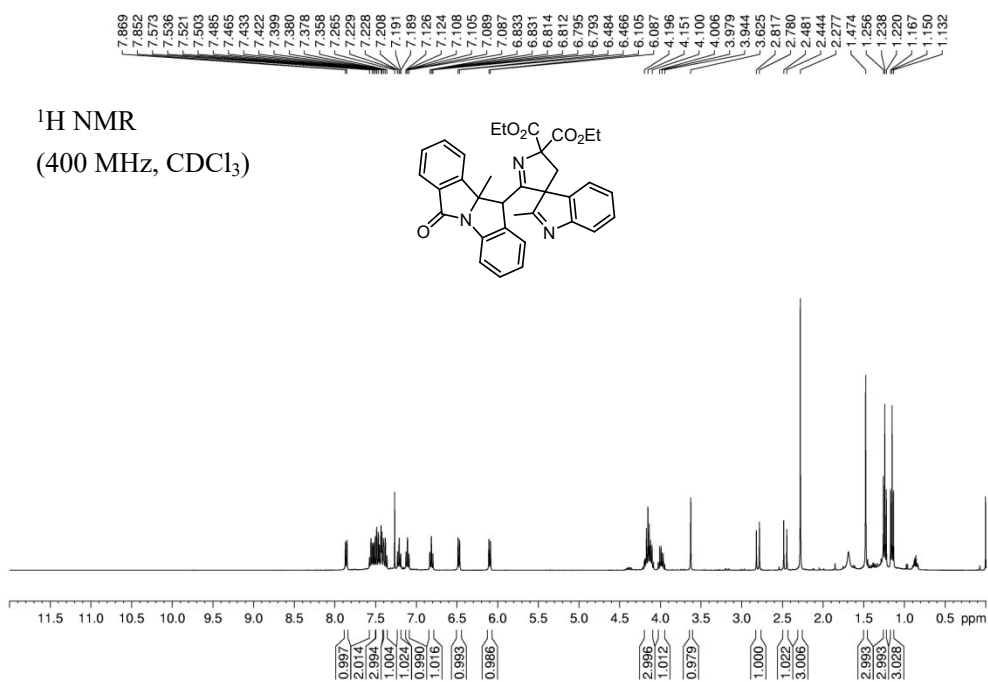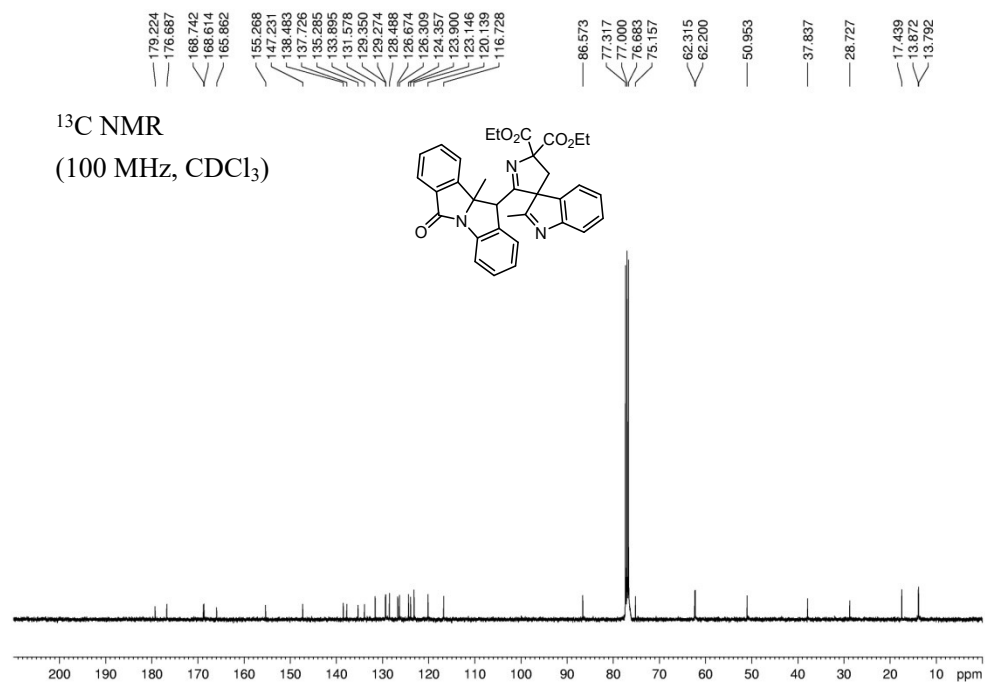

(5d)

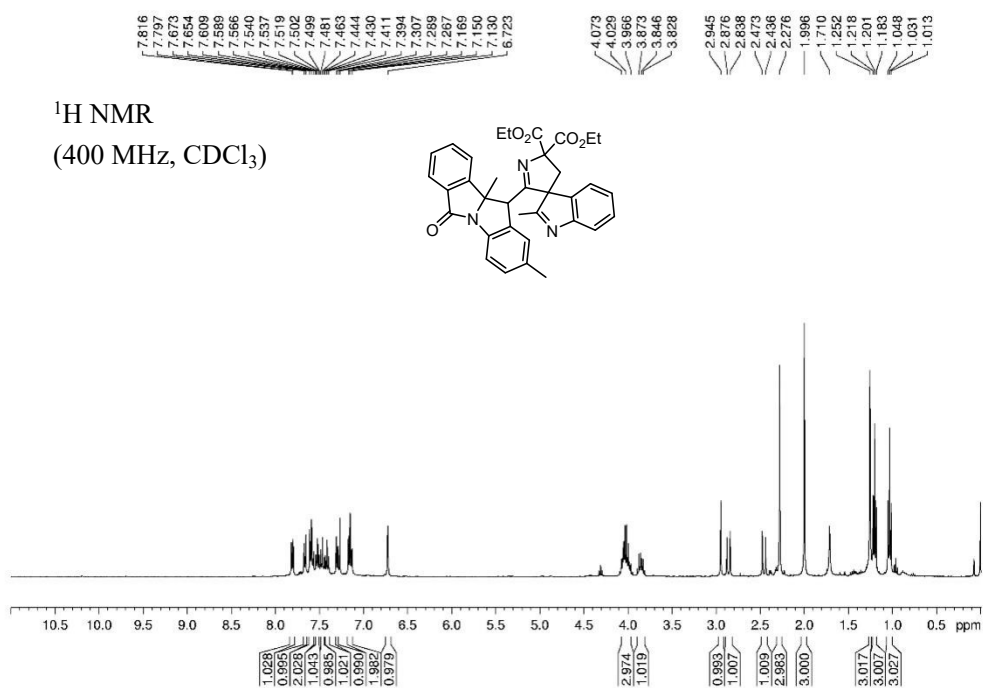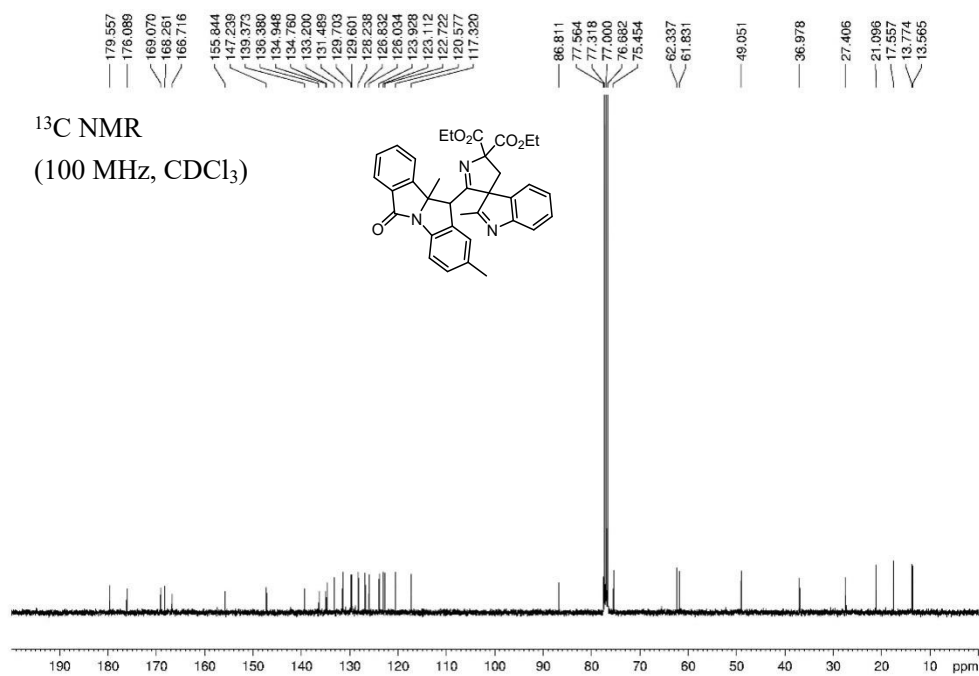

(5d')

$^1\text{H NMR}$   
(400 MHz,  $\text{CDCl}_3$ )

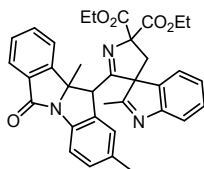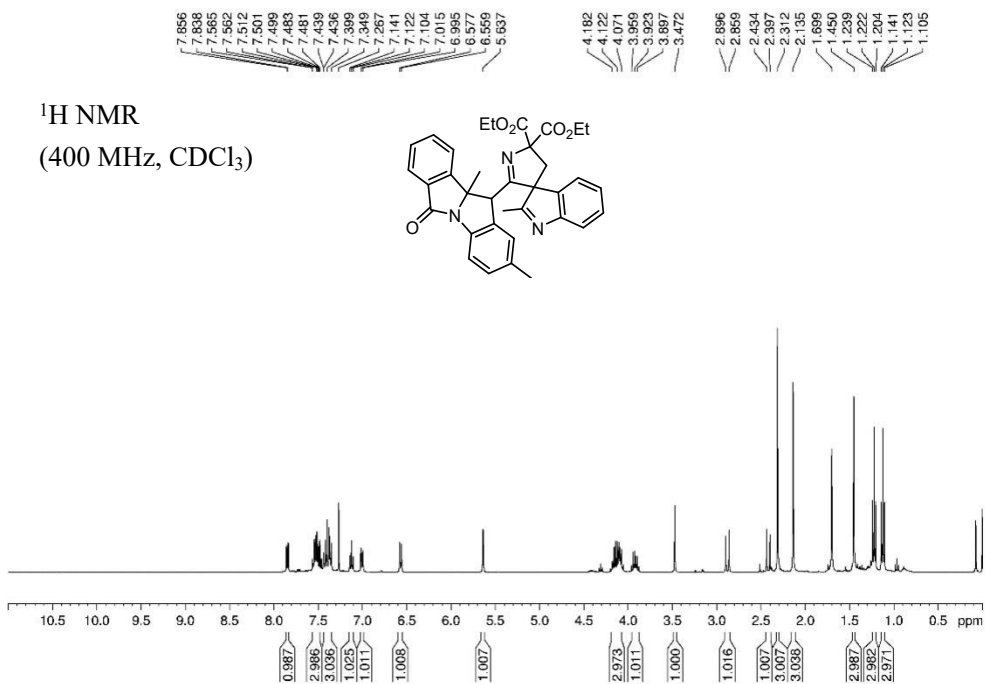

$^{13}\text{C NMR}$   
(100 MHz,  $\text{CDCl}_3$ )

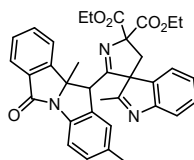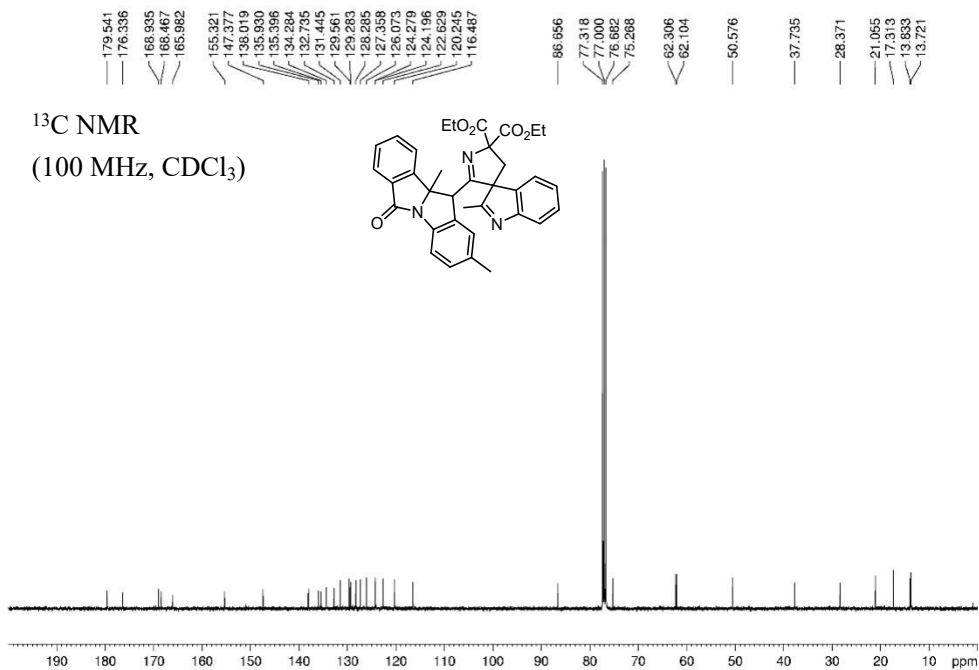

(6a)

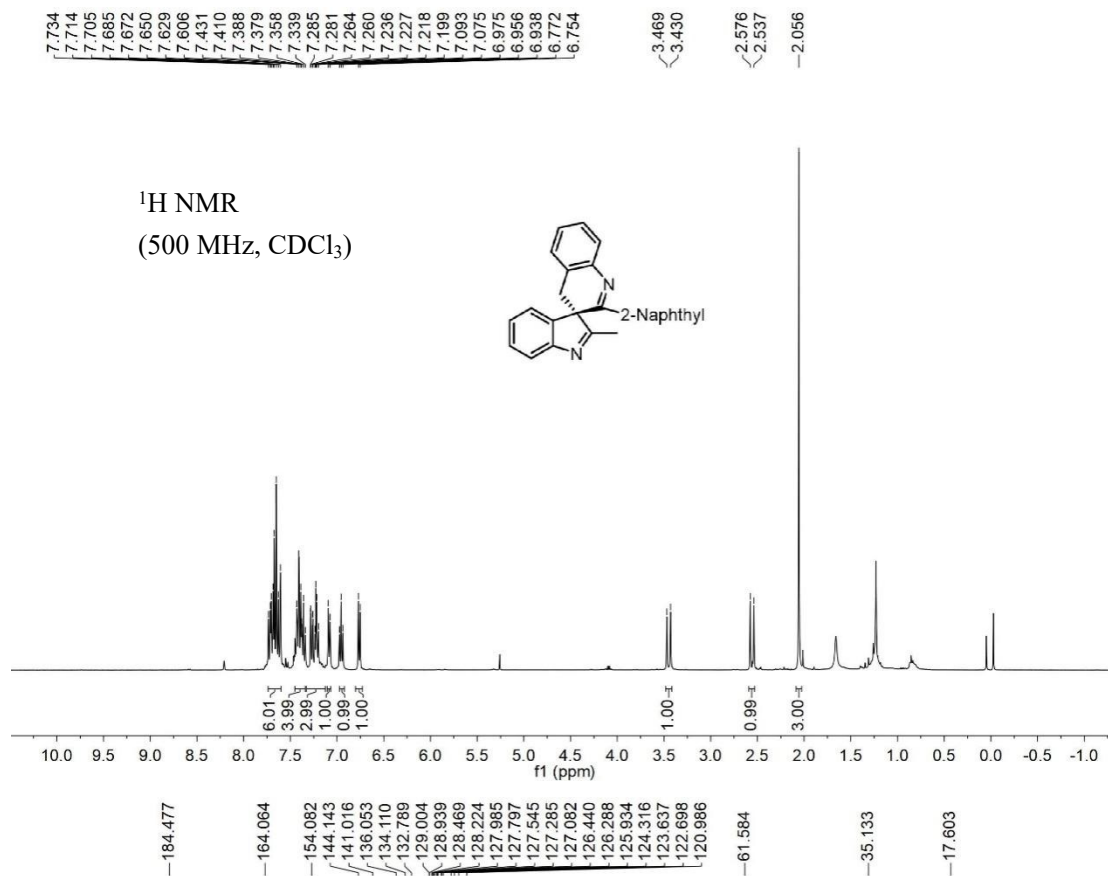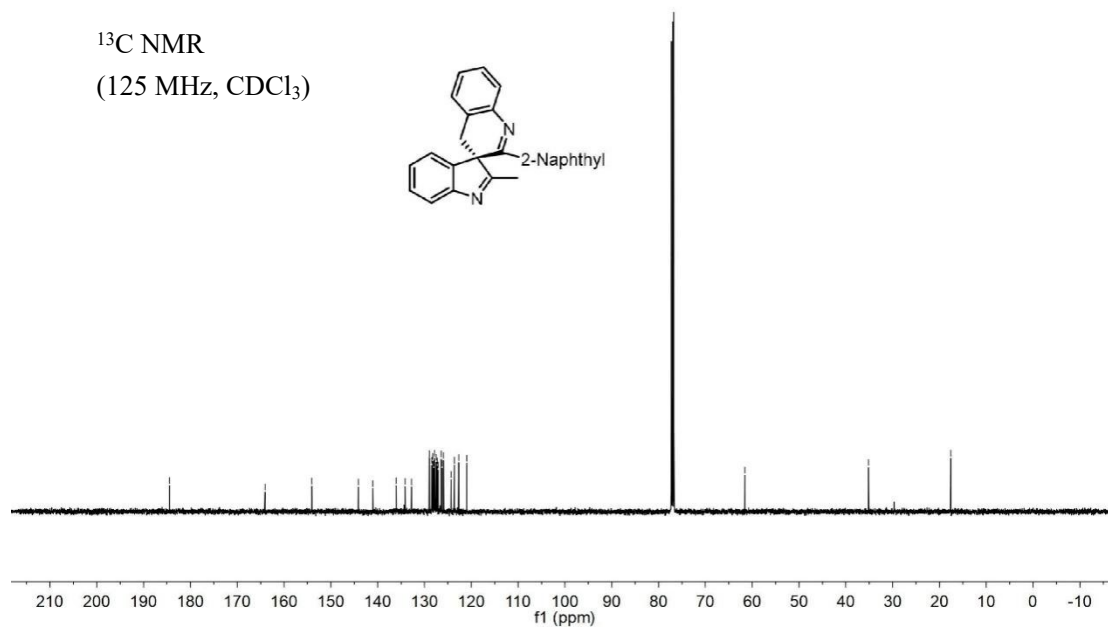

(6b)

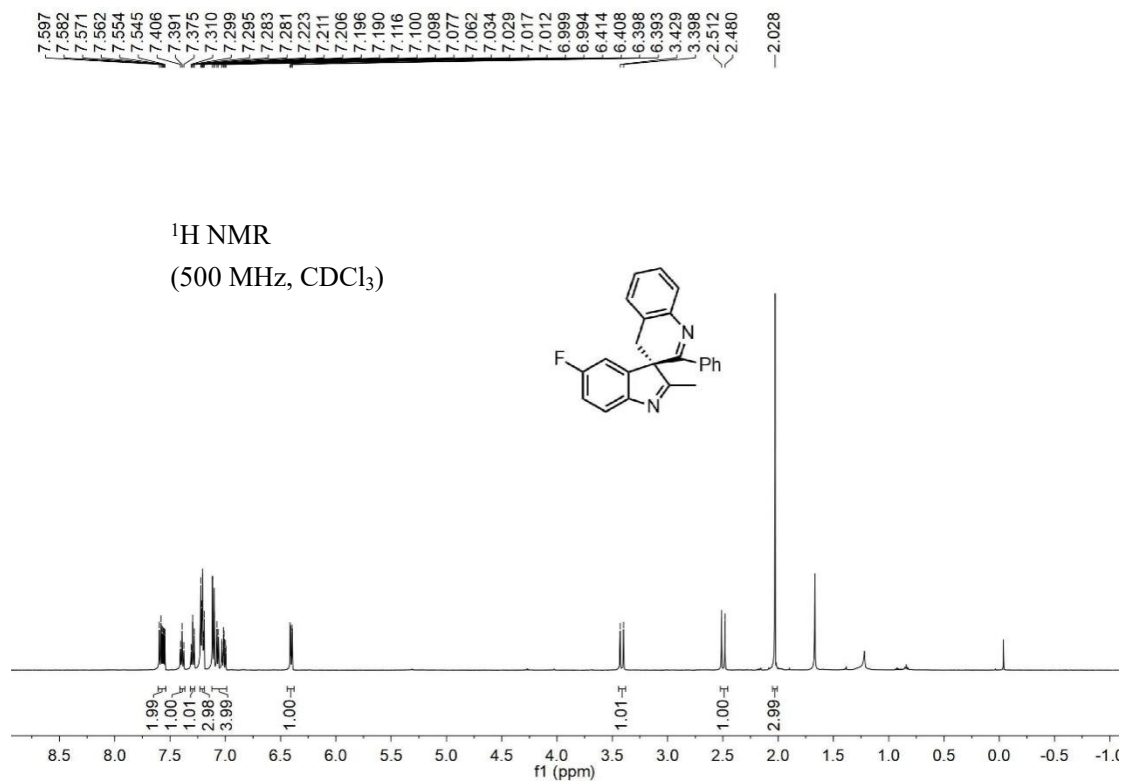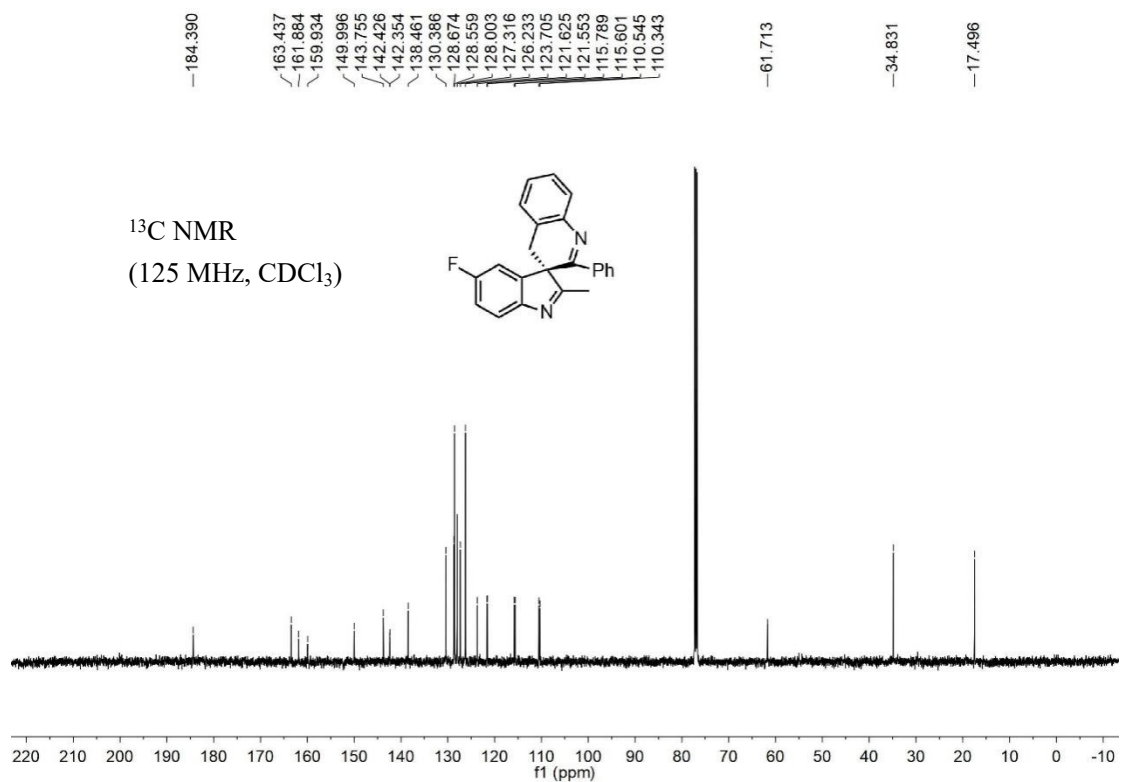

$^{19}\text{F}$  NMR  
(376 MHz,  $\text{CDCl}_3$ )

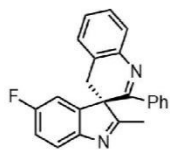

-123.752

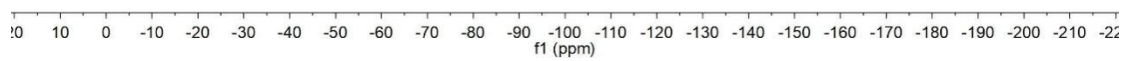



(6c)

$^1\text{H}$  NMR  
(500 MHz,  $\text{CDCl}_3$ )

184.708  
165.177  
159.983  
154.118  
145.075  
140.907  
138.885  
130.427  
129.090  
128.744  
128.679  
126.447  
125.977  
122.835  
121.067  
116.320  
114.088  
112.210  
62.003  
55.668  
34.389  
17.733

$^{13}\text{C}$  NMR  
(125 MHz,  $\text{CDCl}_3$ )

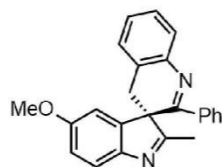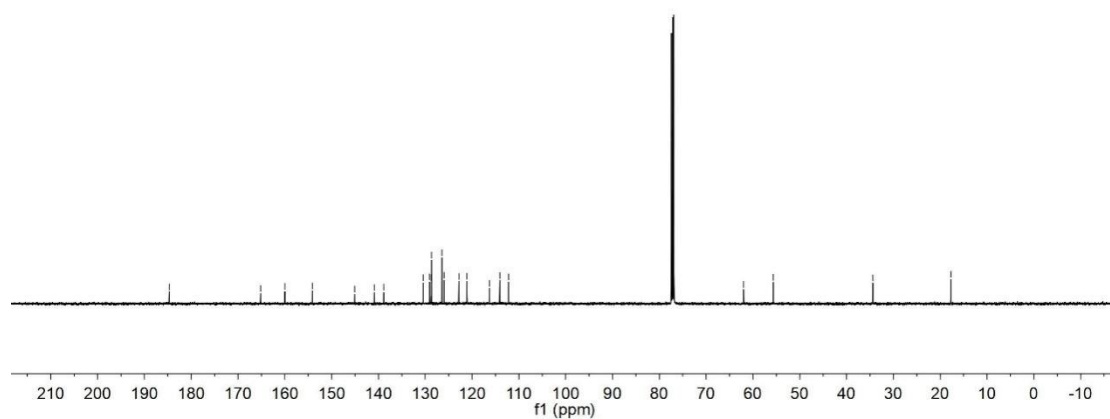

(6d)

8.060  
7.434  
7.426  
7.421  
7.411  
7.375  
7.353  
7.216  
7.211  
7.202  
7.193  
7.188  
7.164  
7.108  
7.089  
7.075  
7.070  
7.061  
7.052  
-4.248  
2.830  
2.811  
2.792  
2.773  
1.307  
1.288  
1.269

<sup>1</sup>H NMR  
(500 MHz, CDCl<sub>3</sub>)

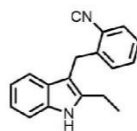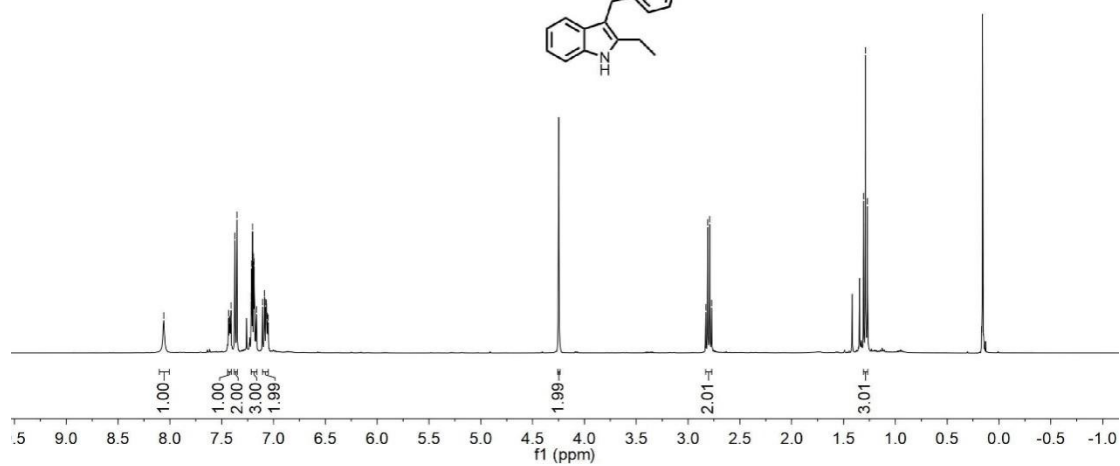

<sup>13</sup>C NMR  
(125 MHz, CDCl<sub>3</sub>)

## 7. X-ray Crystallographic Data

### X-ray Crystallographic Data of (*rac*)-3ai (CCDC: 2103272)

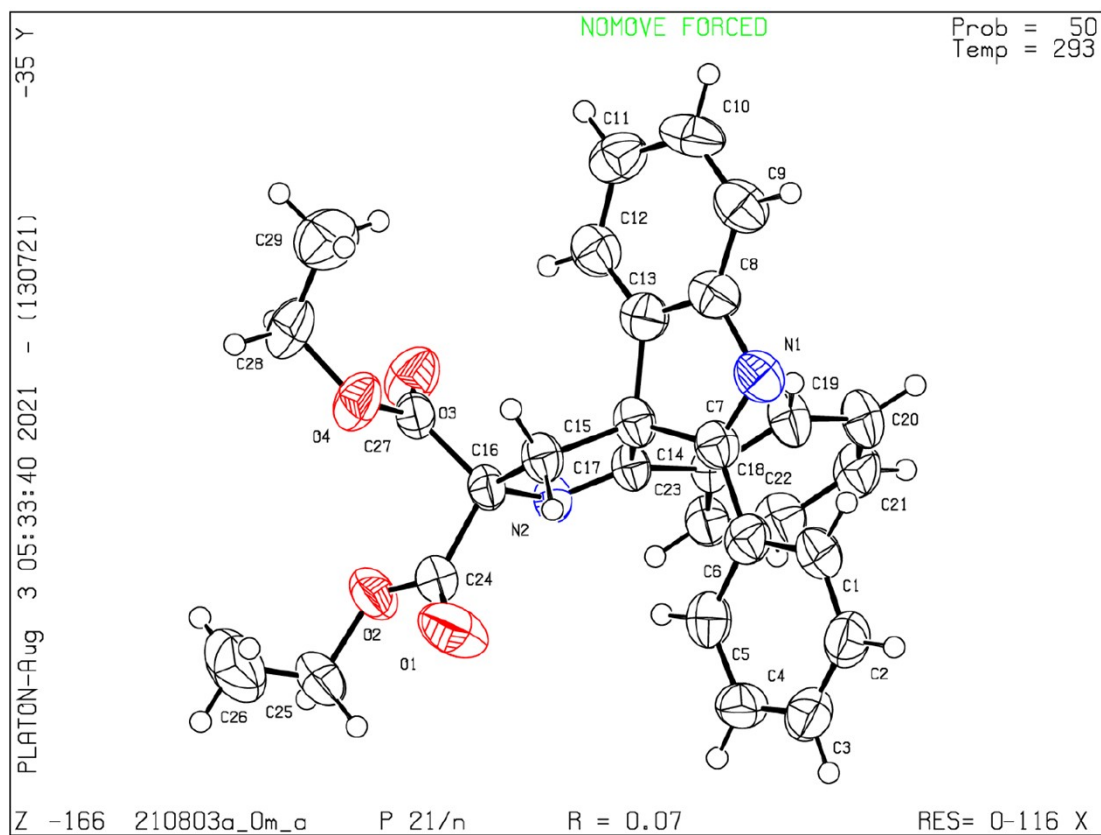

# X-ray Crystallographic Data of (*R*)-3q (CCDC: 2103303)

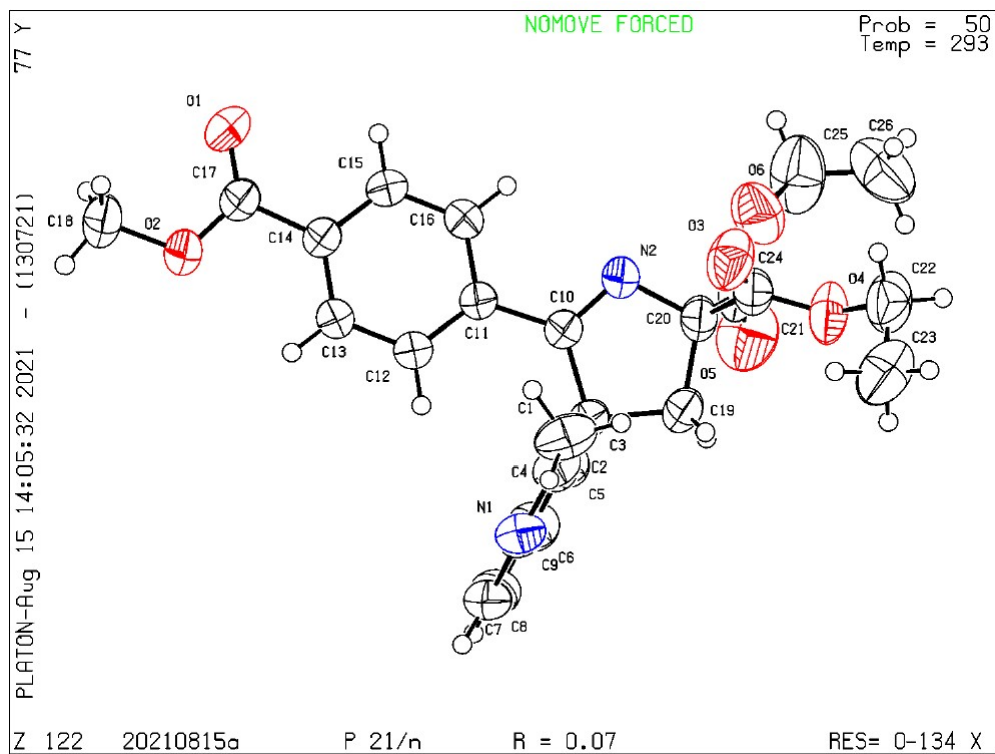

Supplement: d1cc03240b1.pdf [file d1cc03240b1.pdf]
